# Supplementary material for: How patients’ experiences of respiratory tract infections affect healthcare-seeking and antibiotic use: insights from a cross-sectional survey in rural Anhui, China
Source: PubMed Central journal article supplement — BMJ Open. 2018 Feb 3;8(2):e019492. doi: 10.1136/bmjopen-2017-019492 (PMC5829932; doi:10.1136/bmjopen-2017-019492), 2018-02-03
Supplement: bmjopen-2017-019492.draft_revisions.pdf [file bmjopen-2017-019492.draft_revisions.pdf]

# BMJ Open

BMJ Open is committed to open peer review. As part of this commitment we make the peer review history of every article we publish publicly available.

When an article is published we post the peer reviewers' comments and the authors' responses online. We also post the versions of the paper that were used during peer review. These are the versions that the peer review comments apply to.

The versions of the paper that follow are the versions that were submitted during the peer review process. They are not the versions of record or the final published versions. They should not be cited or distributed as the published version of this manuscript.

BMJ Open is an open access journal and the full, final, typeset and author-corrected version of record of the manuscript is available on our site with no access controls, subscription charges or pay-per-view fees (<http://bmjopen.bmj.com>).

If you have any questions on BMJ Open's open peer review process please email [editorial.bmjopen@bmj.com](mailto:editorial.bmjopen@bmj.com)

# BMJ Open

## Symptoms of respiratory tract infections and healthcare-seeking and antibiotics use: a cross sectional survey in rural Anhui, China

|                                 |                                                                                                                                                                                                                                                                                                                                                                                                                                                                                                                                                                                                                                                             |
|---------------------------------|-------------------------------------------------------------------------------------------------------------------------------------------------------------------------------------------------------------------------------------------------------------------------------------------------------------------------------------------------------------------------------------------------------------------------------------------------------------------------------------------------------------------------------------------------------------------------------------------------------------------------------------------------------------|
| Journal:                        | <i>BMJ Open</i>                                                                                                                                                                                                                                                                                                                                                                                                                                                                                                                                                                                                                                             |
| Manuscript ID                   | bmjopen-2017-019492                                                                                                                                                                                                                                                                                                                                                                                                                                                                                                                                                                                                                                         |
| Article Type:                   | Research                                                                                                                                                                                                                                                                                                                                                                                                                                                                                                                                                                                                                                                    |
| Date Submitted by the Author:   | 07-Sep-2017                                                                                                                                                                                                                                                                                                                                                                                                                                                                                                                                                                                                                                                 |
| Complete List of Authors:       | Diao, MengJie; Anhui Medical University School of Health Service Management<br>Shen, Xingrong; Anhui Medical University, School of Health Service Management<br>Cheng, Jing; Anhui Medical University, School of Health Service Management<br>Chai, Jing; Anhui Medical University, School of Health Service Management<br>Feng, Rui; Anhui Medical University, Library Department of Literature Retrieval and Analysis<br>Panpan, Zhang; Anhui Medical University, School of Health Service Management<br>Rongyao, Zhou; Anhui Medical University, Anhui Medical University<br>Wang, DeBin; Anhui Medical University, School of Health Services Management |
| <b>Primary Subject Heading</b>: | Health services research                                                                                                                                                                                                                                                                                                                                                                                                                                                                                                                                                                                                                                    |
| Secondary Subject Heading:      | General practice / Family practice, Public health, Respiratory medicine                                                                                                                                                                                                                                                                                                                                                                                                                                                                                                                                                                                     |
| Keywords:                       | Respiratory tract infection, Healthcare-seeking behavior, Antibiotics, Rural residents, China                                                                                                                                                                                                                                                                                                                                                                                                                                                                                                                                                               |
|                                 |                                                                                                                                                                                                                                                                                                                                                                                                                                                                                                                                                                                                                                                             |

SCHOLARONE™  
Manuscripts

1  
2  
3 **Symptoms of respiratory tract infections and healthcare-seeking**  
4 **and antibiotics use: a cross sectional survey in rural Anhui, China**  
5

6 Mengjie Diao\*, Xingrong Shen, Jing Cheng, Jing Chai, Rui Feng, Panpan zhang,  
7 Rongyao Zhou, Debin Wang#  
8

9 **Corresponding author: Debin Wang.**  
10

11 Post address: 81 Meishan Road, Hefei, Anhui, China, 230032.  
12

13 Email: [dbwang@vip.sina.com](mailto:dbwang@vip.sina.com);  
14

15 Tel/Fax: (0086) 0551-6511-6395.  
16

17 **Mengjie Diao:** School of Health Service Management, Anhui Medical University,  
18 Hefei, Anhui, China.  
19

20 **Xingrong Shen:** School of Health Service Management, Anhui Medical University,  
21 Hefei, Anhui, China.  
22

23 **Jing Cheng:** School of Health Service Management, Anhui Medical University,  
24 Hefei, Anhui, China.  
25

26 **Jing Chai:** School of Health Service Management, Anhui Medical University, Hefei,  
27 Anhui, China.  
28

29 **Rui Feng:** Library Department of Literature Retrieval and Analysis, Anhui Medical  
30 University, Hefei, Anhui, China.  
31

32 **Panpan zhang:** School of Health Service Management, Anhui Medical University,  
33 Hefei, Anhui, China.  
34

35 **Rongyao Zhou:** School of Health Service Management, Anhui Medical University,  
36 Hefei, Anhui, China.  
37

38 **Word count:** 3242  
39  
40  
41  
42  
43  
44  
45  
46  
47  
48  
49  
50  
51  
52  
53  
54  
55  
56  
57  
58  
59  
60

## Abstract

**Objective:** To investigate the occurrence and trajectory of RTI symptoms and their effects on use of self and professional care among patients in the community.

**Design:** A cross sectional retrospective household survey.

**Setting:** 12 administrative villages from rural Anhui, China.

**Participants:** 2160 rural adult residents aged  $\geq 18$  years and registered rural residence or were actually living in the sampled villages when this study was conducted.

**Method:** It solicited information about social demographics, symptoms of last time RTI and healthcare-seeking following the RTI and performed descriptive and multi-regression analysis including: a) percentages of patients with a specific symptom by day on which the symptom occurred(DSO), reached its peak (DSP) and recovered(DSR); b) multivariate logistic regression models of healthcare-seeking and antibiotics use; and c) relationships between number of concurrent symptoms and healthcare-seeking and antibiotics use.

**Results:** The frequencies of DSO of specific symptoms all featured a steep peak followed by a long tail. The number of concurrent symptoms showed clear increasing trend with seeking help from clinics and being prescribed with antibiotics. Multivariate regression revealed statistically significant associations between: a) visiting clinics and education(OR=0.790), sore throat(OR=1.355), cough(OR=1.492), shortness of breath(OR=1.707) and fever(OR=2.142); b) buying medicine from shops without prescription and education(OR=1.230) and cough(OR=1.452); c) getting antibiotics at clinics and sore throat(OR=2.05) and earache and/or tinnitus(OR=4.884) and d) obtaining antibiotics at medicine shops and productive cough(OR=1.971).

**Conclusions:** RTI symptoms manifest featured trajectories and play an important role in shaping both the patient- and doctor-dominated responses toward the infections.

### Strengths and limitations of this study

Contrasting contemporary focus on demand and supply side factors, this study centered on effects of symptoms on RTI-related care.

The study described detailed trajectory of common symptoms and analyzed collective effects of concurrent symptoms.

The study relied on subjective perceptions or self-reports and therefore may be biased by potential under or over reporting.

The study used a broad definition of RTIs and the occurrence and trajectory of symptoms may be distorted by part of the infections that were exceptionally high or low due to seasonal and other factors when the study was conducted.

## Background

Respiratory tract infections (RTIs) are the most common diseases in humans. Studies have demonstrated that adults usually experience 1–3 times of upper respiratory tract infections per year,[1,2] whereas children have considerably greater chances of getting the infections (up to 11, depending on age) and experience more prolonged symptoms.[3] RTIs claim over 3 million lives annually and are the leading cause of death for children younger than 5 years.[4,5] Although many RTIs are mild and self-limiting, they are associated with significant burden in terms of medical visits as well as work and school absenteeism. It is estimated that the median duration of an episode of non-influenza-related viral respiratory tract infection (the most common but least serious kind of RTIs) is 7.4 days, with 25% of cases lasting for 2 weeks.[6] According to the 1996 report from the National Center for Health Statistics of US, viral RTIs alone caused approximately 20 million lost workdays in adults and 21 million lost school days in children annually.[7] While a study in 13 European countries in 2007 indicated that one case of acute cough and lower RTIs caused 3.08 lost workdays and €56.29 direct cost plus €287.09 indirect cost.[8] In addition to heavy burden on health systems and patients, RTIs are closely linked to antibiotics use and resistance. It is estimated that RTIs account for up to 60% of all antibiotic prescribing in primary care,[9,10] Irrational use or abuse of antibiotics is recognized as one of the most serious public health issues worldwide. Antibiotic abuse not only increases cost of care, exposes people to unnecessary side effects, but also accelerates antibiotic resistance.[11]

According to the 10th edition of the International Classification of Diseases, RTIs comprise as many as 34 kinds of infections. However their symptoms are relatively limited consisting of mainly sore throat, fever, cough, productive cough, rhinorrhea with or without pus, shortness of breath, headache and/or general discomfort, purulent sputum, earache and/or tinnitus.[12,13] When faced with symptoms, patients' responses vary greatly. Some patients manage their symptoms by simply having a rest, drinking warm water etc. without using any medicines;[14] others buy medicines from medicine shops or pharmacies or seek professional help from doctors;[15-17] still others opt to traditional remedies.[18, 19] A 2014 study of consumer attitudes on cough and cold in US indicated that 36.1% of those surveyed reported beginning OTC treatments at the first sign of cough/cold, 42.6% waited until cold symptoms 'get bad enough' (i.e. to cause distress) and another 20.2% waited until they have more than one symptom before beginning treatment. Putting together, 55% of them sought professional care eventually [20]. These varied responses may be attributed to a whole range of reasons including: 'diseases features', e.g., severity of symptoms and their patterns of progress (aggravating versus, diminishing symptoms);[2] and 'demand side' issues such as age, gender, education,[21] knowledge and attitudes about RTIs and RTI-related services,[22,23] cultural expectations and social norms; [24,25] and 'supply side' factors such as perverse financial incentives, systemic pressures on healthcare providers and

1  
2  
3 professional standards.[24,26,27] Previous studies on determinants of health service  
4 utilization following RTIs have been focused mainly on the demand and supply side  
5 factors with little attention been paid to the occurrence and trajectory of RTI  
6 symptoms among patients in the community and their effects on decisions about self  
7 or professional care.

8  
9 RTIs are also very common in China with an incidence rate ranging from 84.13% to  
10 120.831% in 2006.[28] These translate into 2 to 4 times of RTIs per person per year  
11 and 16 billion person-times of RTIs annually in the whole country. Data about  
12 service use for RTIs among China residences are scarce. But limited researches  
13 reported huge discrepancies between different populations and very high use of  
14 antibiotics at various medical settings. An earlier study at rural primary care settings  
15 of 10 provinces in Western China showed that nearly 50% of all the patients were  
16 prescribed antibiotics.[29] Another recent study found that antibiotics were  
17 prescribed for 78% of colds and 93.5% for acute bronchitis.[30] Studies exploring  
18 reasons for the varied service use and prevalent antibiotic prescription in China are  
19 also lacking. According to our systemic literature review, there is little publication  
20 that focuses primarily on factors affecting service and antibiotics use following RTIs.  
21 Although a number of papers on reasons of general service utilization did include  
22 RTIs as a subcomponent, they again addressed only demand and supply side factors.

## 23 **Methods**

### 24 Study sites and population

25 The study adopted a stratified-clustered randomized sampling in recruiting site  
26 villages and participating residents. Selection of site villages proceeded in 4 steps.  
27 Step 1 divided all counties in Anhui province into north, middle and south regions.  
28 Step 2 randomly selected 4 counties from each of the three regions and 1 township  
29 from each of the counties selected and then 1 administrative village from each of the  
30 site township selected above. Step 3 randomly selected 1 household from the village  
31 selected as the starting household and then recruited 180 households being  
32 geographically most close to the starting household. Step 4 randomly selected one  
33 household member from each of the households according to preset eligibility  
34 criteria, i.e., men and women who: a) had registered rural residence and were  
35 actually living in the sampled villages when this study was conducted; b) aged 18  
36 years and plus; c) were willing to participate and able to answer the survey  
37 questions.

### 38 Questionnaire

39 The study used a structured questionnaire consisting of questions about four  
40 categories of variables: a) social demographics (e.g., gender, age and education); b)  
41 last time symptomatic RTI, including symptoms experienced (e.g., sore throat, fever,  
42 dry cough, productive cough, rhinorrhea without pus, rhinorrhea with pus, shortness  
43 of breath, headache and/or general discomfort, earache and/or tinnitus) and day on  
44 which a specific symptom occurred (DSO), reached its peak or became most serious  
45 (DSP) and recovered (DSR); c) responses toward the RTI, including taking leftover  
46

1  
2  
3 medicines, buying medicine(s) from medicine shops (hereafter referred to as buying  
4 medicine) and seeking help from clinics; d) antibiotics obtained from clinics and  
5 medicine shops.

#### 6 Data collection

7  
8 Filed data collection took place during 30 April to 12 May 2016 via face-to-face  
9 interviews using the structured questionnaire mentioned above. Twenty-six under  
10 graduate students from Anhui Medical University performed the interview.  
11 Measures taken to ensure data quality included: a) training and examination of the  
12 filed data collector; b) daily checks, by quality supervisor, of all the questionnaires  
13 completed during the day; c) retest of 5% randomly selected subjects; d) feedback of  
14 errors found via the daily checks and retests; e) elimination of disqualified field data  
15 collectors.

#### 16 Data analysis

17  
18 The data collected were doubled-entered using EPI DATA 3.1 and analyzed via  
19 SPSS 10.01 and Microsoft Excel 2010. Data analysis included: a) distribution of  
20 respondents by gender, age and education; b) percentages and accumulative  
21 percentages of patients by DSO, DSP and DSR for different RTI symptoms in total  
22 and by different demographics; c) multivariate logistic regression models of  
23 healthcare-seeking and antibiotics use using the social demographics and common  
24 symptoms as the independent variables; d) the relationships between number of  
25 symptoms experienced by single patient and his or her healthcare-seeking and  
26 antibiotics use. Cases with missing data were excluded from the data analyses.

#### 27 Ethical review

28  
29 The study involved recruitment and assessment of a sample of rural residents and  
30 thus adhered to rigorous human subject production principles and procedures. The  
31 study protocol had been reviewed and approved by the Biomedical Ethics  
32 Committee of Anhui Medical University (reference number: 201500800) study  
33 commence. Participation of rural residents was voluntary and written informed  
34 consent was sought from all participants.

### 35 Results

#### 36 Overview of participants, symptoms and healthcare-seeking

37  
38 As shown in Figure 1, a total of 2160 residents were accessed and 1968 completed  
39 the survey, resulting in a response rate of 91.1%. The mean age of these respondents  
40 was 50.39 years (SD=13.04 years). The majority (68.0%) of them was females and  
41 around one third (29.6%) had no formal school education (For details, see the appendix).  
42 Dry cough (58.9%, 1159), rhinorrhea without pus (51.7%, 1017), sore throat (49.8%, 980)  
43 and shortness of breath (18.3%, 360) were the most frequent symptoms. Following RTIs,  
44 55.7% of the patients sought professional help from clinics, 13.4% bought medicine  
45 from medicine shops, 23.1% used leftover medicine from previous illnesses and 20.8%  
46 did nothing. Putting together, 81.3% of them used antibiotics.



### Development of symptoms

Figure 2 displays common symptoms the respondents had experienced due to their last time RTIs. The lines representing DSO of specific symptoms all featured a skewed peak, i.e., they increased rapidly at the beginning, reached a sharp peak on day 1 or day 2, and then followed by a long tail reaching over 15 days. The height of the peaks varied greatly across symptoms ranging from 28.3% for rhinorrhea with pus to 56.8% for sore throat. The curves representing DSP of specific symptoms mimicked the shape of DSO in general, but showed a delayed (for 2 to 3 days) and lower (by 22.0% to 33.8%) peak. The DSR curves deviated a step further from DSO curves. They had 2 to 3 peaks centered on day 3, day 5, day 10 and especially day 7. The lines depicting accumulative rates of symptom occurrence (ARSO), symptom peak (ARSP) and symptom recovery (ARSR) by different days following onset of RTIs all showed an atypical “S-shape”. In terms of ARSO lines, the one representing dilute snivel displayed the fastest increase followed by the lines for sore throat, fever, headache/general discomfort, dry cough, productive cough, shortness of breath, rhinorrhea with pus, earache and/or tinnitus. Looking at the differences between the lines of ARSO, ARSP and ARSR for a same symptom, ARSP was much more close to ARSO than ARSR. The time lag between ARSO and ARSR was the biggest for cough followed by that of sore throat, shortness of breath, rhinorrhea with pus, headache and soreness, rhinorrhea without pus, rhinorrhea with pus, earache and/or tinnitus, fever.

Figure 3 shows the distribution of DSO, DSP and DSR of three selected symptoms (including dry cough, rhinorrhea without pus, sore throat) by different demographic characteristics (more information about symptom trajectories by different subgroups is given in Appendix 2 and 4). There was no statistical difference in these distributions between different social demographic subgroups for almost all of the symptoms studied except rhinorrhea without pus, headache and soreness, shortness of breath. The respondents with over 10 years of education tended to report earlier occurrence of headache and soreness, shortness of breath but later rhinorrhea without pus; while those aged over 60 years were more likely to experience earlier rhinorrhea without pus.

### Individual symptoms and service use

Table 1 provides selected statistics of logistic regression modeling between service use and individual symptoms and socio-demographics. Education was negatively associated with seeking help from clinics (OR= 0.790[0.697-0.896]), but positively related with buying medicine (OR=1.230[1.068-1.417]) and using leftover medicine (OR=1.283[1.073-1.535]); Females were more likely to use leftover medicine than males (OR=2.016[1.411-2.881]); while age had no effects on all the behaviors. When controlled for social demographics, buying medicine was positively related with cough (OR=1.452[1.124-1.875]); while taking leftover medicine, with headache and soreness (OR=1.581[1.169-2.138]); and seeking help from clinics, with sore throat (OR=1.355[1.109-1.654]), cough (OR=1.492[1.198-1.859]),



1  
2  
3 shortness of breath (OR=1.707[1.287-2.265]) and fever (OR=2.142[1.654-2.775]).  
4 As for getting antibiotics at clinics, it only witnessed positive relation with earache  
5 and/or tinnitus (OR=4.884[1.162-20.522]); while buying antibiotics from medicine  
6 shops was only positively linked with productive cough (OR=1.971[1.125-3.453]).  
7 Rhinorrhea with pus and Rhinorrhea without pus have no associations with all the  
8 behaviors.  
9

### 10 **Concurrent symptoms and service use**

11 Figure 4 displays the relationships between service-seeking and number of  
12 concurrent symptoms in total and by demographics. Putting together, seeking help  
13 from clinics and getting antibiotics at clinics witnessed a clear increase trend with  
14 number of symptoms. Only 37.5% of the respondents who had experienced one  
15 symptom had sought help from clinics; while 75.0% those who had experienced  
16 over seven symptoms had done so. Similarly, the use of antibiotics at clinics  
17 increased from 77.7% for patients with one symptom to 96.4% for those with over  
18 seven symptoms. However buying medicine from shops, taking leftover medicine  
19 and getting antibiotics from shops showed no statistically significant trend as the  
20 number of symptoms increased. Looking at social demographics, the increasing  
21 relationships between the number of symptoms and service-seeking were consistent  
22 across all gender, age and education subgroups. This inter-subgroup consistency was  
23 also observed in the null trend of getting antibiotics at clinics or at medicine shops  
24 by patients with increasing number of symptoms.  
25  
26  
27  
28  
29

### 30 **Discussion**

31 This study uncovered useful data for better understanding RTIs among patients in  
32 the community and their relations with healthcare seeking and antibiotics use. It  
33 described detailed trajectories of the occurrence, peak and disappearance of common  
34 RTI symptoms. Such data are essential for both clinicians and patients, as they set  
35 expectations and let them know when the illness is deviating from the expected [6,  
36 31]. Commonly used estimates of the expected time course of RTI symptoms are  
37 highly variable and not always evidence-based but reflects expert opinions.[32]  
38 Although a number of studies have documented onset and duration of cough,  
39 earache etc. in terms of median days or days of interquartile range,[20, 33-35]the  
40 current study is the first to portrait the course of common RTI symptoms using  
41 curves of frequencies by days following onset of RTIs. These featured curves (a  
42 sharp increase and peak followed by a long tail) provide intuitive and detailed  
43 information. This study also revealed that most of the RTI symptoms did not show  
44 statistically significant differences between socio-demographic subgroups except for  
45 education and age. The more educated tended to report earlier occurrence of  
46 headache and soreness, shortness of breath but later rhinorrhea without pus; while  
47 those aged over 60 years, more likely to experience rhinorrhea without pus. The  
48 difference between education groups may be explained by: a) the more educated  
49 may be more sensitive to their health; [22,23,36] b) the more educated may have  
50 greater chance, due to better health and environment conditions, of avoiding part of  
51  
52  
53  
54  
55  
56  
57  
58  
59  
60

1  
2  
3 the less virulent RTIs. Similar difference in susceptibility to RTIs may also apply to  
4 the under versus over 60 years. In addition, the over 60 years may have different  
5 immunological responses as compared with that of the under 60 years [37].

6  
7 The study showed selective associations between service use and socio-  
8 demographics. More specifically, education was negatively related to seeking help  
9 from clinics but positively linked to taking leftover medicine and buying medicine  
10 from shops; while females are more likely than males to take leftover medicine.  
11 However using antibiotics at clinics and medicine shops did not show any  
12 statistically significant difference between socio-demographic subgroups. These  
13 findings suggest that the decision on whether or not to seek help from clinics, to take  
14 leftover medicine or to buy medicine from a shop is made by the patients themselves  
15 and is thus amenable to the influence of the patients' socio-demographics; while the  
16 decision on whether or not to give antibiotics to patients is determined mainly by the  
17 doctors at clinics or staff at medicine shops and thus is not affected by the patients'  
18 socio-demographics. Therefore the claim that antibiotic overuse is driven by patient  
19 demand and/or expectations may be a misperception on the part of healthcare  
20 providers, or a rationalization of their own antibiotic prescribing practices. [25,38]

21  
22 The study documented strong and consistent relations between symptoms and  
23 service-seeking. As the number of concurrent symptoms increased from 1 to 7 or  
24 more, the proportion of patients who had sought help from clinics increased from  
25 37.5% to 75.0% and the proportion of service seekers who had been prescribed  
26 antibiotics increased from 77.7% to 96.4%. These findings suggest that symptoms  
27 affect both patient- and doctor-dominated behaviors and thus merit particular  
28 attention in future interventions. Interestingly, the difference in the percentage of  
29 service-seeking for patients with 1 symptom (37.5%) versus that for those with 7+  
30 symptoms (75.0%) is substantially greater than that of antibiotics prescribing (77.7%  
31 versus 96.4%). This may be explained by: a) patients had real sufferings from the  
32 symptoms while professionals were only indirectly told about the symptoms and so  
33 patient dominated behaviors (e.g., health service-seeking) may be more sensitive to  
34 symptoms than professional-dominated ones (e.g., antibiotics prescribing); [39,40] b)  
35 as lay persons, patients may not be as capable as doctors in distinguishing important  
36 from non-important symptoms, and so numbers of symptoms have closer links with  
37 percept urgency among patients than professionals. As for the non-significant  
38 relations between number of symptoms and buying medicines from shops, it may  
39 reflect the combined effects of two drivers. On the one hand, more symptoms serve  
40 as a greater driver for the patients to seek professional help from clinics as well as  
41 medicine shops. On the other, seeking help from clinics and shops are competitive  
42 behaviors and as patients experience more symptoms they feel greater urgency to  
43 visit clinics than shops. Looking at the relations between specific symptoms and  
44 service-seeking, all those with statistical significance were positive. Seeking help  
45 from clinics was linked to, in order of magnitude of logistic regression coefficient,  
46 fever (B=0.76), shortness of breath (B=0.54), cough (B=0.40) and soreness (B=0.30).  
47  
48  
49  
50  
51  
52  
53  
54  
55  
56

1  
2  
3 These coefficients and their rank order reveal useful information about the perceived  
4 importance, suffering and urgency of each of the corresponding symptoms for  
5 patients. Compared with seeking help from clinics, the driving symptoms for buying  
6 medicine from shops may be relatively milder in nature and fewer in number. The  
7 former showed significant relations with 4 symptoms; while the latter, only 1  
8 symptom, dry cough. This indicates that patients with equal access to the two kinds  
9 of help tend to choose clinics than shops if they have more and severer symptoms  
10 and vice versa. In addition, being given antibiotics at clinics was linked with earache  
11 and/or tinnitus and at medicine shops, productive cough. These seem to be  
12 consistent with published evidences.[41]

13  
14  
15 The study also has limitations. First, it relied heavily on subjective perceptions or  
16 self-reports. Individuals are poor at accurately reporting certain health behaviors and  
17 feelings. They are particularly prone to under- or over-estimations because of the  
18 inherent tendency to respond in a way that makes them appear healthier or more  
19 confirm to social standards. However, these demand characteristics are typically  
20 apparent across the board, reducing the effects of this threat to internal validity.  
21 Second, the study used a broad definition of RTIs by enumerating all common  
22 symptoms and included various infections, e.g., common cold, influencing, sore  
23 throat. So the occurrence and trajectory of symptoms may be distorted by part of the  
24 infections that were exceptionally high or low due to seasonal and other factors  
25 when the study was conducted. Third, the study was undertaken in one province of a  
26 vast and diverse country and readers are cautioned about potential risks in  
27 generalizing the findings to other parts of China.

### 32 **Abbreviations**

33 **RTI(S)** respiratory tract infection(s)

34 **DSO** day on which symptom occurred

35 **DSP** day on which symptom reached its peak or became most serious

36 **DSR** day on which symptom recovered

37 **ARSO** Accumulative rate of symptom occurrence

38 **ARSP** Accumulative rate of symptom peak

39 **ARSR** Accumulative rate of symptom recovery

40  
41 **Contributors** Mengjie Diao drafted the manuscript. Jing Cheng and Jing Chai  
42 implemented field data collection. Xingrong Shen designed the instruments and  
43 performed the data analysis. Debin Wang provided expertise for overall design of  
44 the study and revised and finalized the manuscript.

45  
46 **Funding** This study was supported partly by China-UK Prosperity Found (Grant  
47 number PPY CHN 1590/15SS19) and partly by the National Nature Science  
48 Foundation of China (Grant number 81661138001 and 71704003).

49  
50 **Declaration of Conflicting Interests** The authors declare no potential conflicts of  
51 interest with respect to the research, authors and/or publication of this article.

52  
53 **Data sharing statement** All data are publicly available.

## References

1. Leder K, Sinclair M I, Mitakakis T Z, et al. A community-based study of respiratory episodes in Melbourne, Australia[J]. *Aust N Z J Public Health*.2003;27(4):399–404.DOI: 10.1111/j.1467-842X.2003.tb00416.x [PubMed: 14705301]
2. Hull J D, Barton I P, Torgersen J, et al. A Survey of the Experience and Impact of Acute Upper Respiratory Tract Infections on People in Six Countries in the 2011/2012 Common Cold and Flu Season[J]. *Open Journal of Respiratory Diseases*, 2013, 03(4):175-187.DOI: 10.4236/ojrd.2013.34026
3. Grüber C, Keil T, Kulig M, et al. History of respiratory infections in the first 12 yr among children from a birth cohort.[J]. *Pediatric Allergy & Immunology*, 2008, 19(6):505–512.DOI: 10.1111/j.1399-3038.2007.00688.x. [PubMed: 18167154]
4. Collaborators M C O D. Global, regional, and national age-sex specific all-cause and cause-specific mortality for 240 causes of death, 1990-2013: a systematic analysis for the Global Burden of Disease Study 2013.[J]. *Lancet*, 2015, 385(9963):117-171.DOI:10.1016/S0140-6736(14)61682-2. [PubMed: 25530442]
5. More than 1.2 million adolescents die every year, nearly all preventable. <http://www.who.int/mediacentre/news/releases/2017/yearly-adolescent-deaths/en/> (accessed 5 Jul 2017).
6. Thompson M, Vodicka T A, Blair P S, et al. Duration of symptoms of respiratory tract infections in children: systematic review[J]. *Bmj British Medical Journal*, 2013, 347(dec11 1):f7027.DOI: 1136/bmj.f7027 [PubMed: 24335668]
7. Adam PF, Hendershot GE, Marano MA. Current estimates from the National Health Interview Survey [J]. *Vital Health Stat*, 1999, 10(6):59-66. [Pubmed: 15782448]
8. Oppong R, Coast J, Hood K, et al. Resource use and costs of treating acute cough/lower respiratory tract infections in 13 European countries: results and challenges[J]. *European Journal of Health Economics*, 2011, 12(4):319-329. DOI: 10.1007/s10198-010-0239-1. [Pubmed: 20364288]
9. Petersen I, Hayward A C. Antibacterial prescribing in primary care[J]. *Journal of Antimicrobial Chemotherapy*, 2007, 60 Suppl 1(Supplement 1):i43. DOI:10.1093/jac/dkm156 [PubMed: 17656380]
10. Gulliford M C, Dregan A, Moore M V, et al. Continued high rates of antibiotic prescribing to adults with respiratory tract infection: survey of 568 UK general practices[J]. *Bmj Open*, 2014, 4(10):e006245.DOI: 10.1136/bmjopen-2014-006245. [PubMed: PMC4212213]
11. Costelloe C, Metcalfe C, Lovering A, et al. Effect of antibiotic prescribing in primary care on antimicrobial resistance in individual patients: systematic review and meta-analysis[J]. *Bmj*, 2010, 340(7756):1120-1120.DOI: 10.1136/bmj.c2096. [PubMed: 20483949]
12. Lu Y, Tong J, Pei F, et al. Viral aetiology in adults with acute upper respiratory tract infection in Jinan, Northern China.[J]. *Clinical & Developmental Immunology*, 2013, 2013(2):869521-869521. DOI: 10.1155/2013/869521. [PubMed: PMC3649347 ]
13. Kochen M M, Susanne F, Thomas F, et al. Influence of patient symptoms and physical findings on general practitioners' treatment of respiratory tract infections: a direct observation study[J]. *Bmc Family Practice*, 2005, 6(1):1-7.DOI: 10.1186/1471-2296-6-6

- [Pubmed: PMC550651 ]
14. Halvorsen P A, Godycki-Cwirko M, Wennevold K, et al. Would GPs advise patients with respiratory tract infections to refrain from exercise, stay indoors or stay in bed? Survey of GPs in Poland and Norway[J]. *European Journal of General Practice*, 2013, 20(3):209-213.DOI: 10.3109/13814788.2013.848339. [Pubmed: 24219344 ]
  15. Ahmad A, Patel I, Mohanta G P, et al. Evaluation of Self Medication Practices in Rural Area of Town Sahaswan at Northern India[J]. *Annals of medical and health sciences research*, 2014, 4(2):73-8. DOI: 10.4103/2141-9248.138012. [Pubmed: PMC4145522 ]
  16. Courtenay M, Rowbotham S, Lim R, et al. Antibiotics for acute respiratory tract infections: a mixed-methods study of patient experiences of non-medical prescriber management[J]. *Bmj Open*, 2017, 7(3):e013515. DOI: 10.1136/bmjopen-2016-013515. [Pubmed: PMC5353344]
  17. Essack S, Pignatari A C. A framework for the non-antibiotic management of upper respiratory tract infections: towards a global change in antibiotic resistance.[J]. *International Journal of Clinical Practice*, 2013, 67(Supplement s180):4-9.DOI:10.1111/ijcp.12335. [Pubmed: 24238424]
  18. Wang X, Liu Z. Prevention and treatment of viral respiratory infections by traditional Chinese herbs[J]. *Chinese medical journal*, 2014, 127(7):1344-1350.DOI: 10.3760/cma.j.issn.0366-6999.20132029 [Pubmed: 24709192]
  19. Wun Y T, Tai P L, Lam K F, et al. Comparison of the knowledge, attitudes and practice with antibiotic use between traditional Chinese medicine and western medicine usual attenders in Hong Kong[J]. *Complementary Therapies in Medicine*, 2014, 22(1):99-106.DOI: 10.1016/j.ctim.2013.11.004. [Pubmed: 24559824]
  20. Blaiss M, Dicipinigaitis P, Eccles R, et al. Consumer Attitudes on Cough and Cold: US (ACHOO) Survey Results.[J]. *Current Medical Research & Opinion*, 2015(8):1527-1538. DOI: 10.1185/03007995.2014.1002558. [Pubmed: 25535904]
  21. Birk H O, Gut R, Henriksen L O. Patients' experience of choosing an outpatient clinic in one county in Denmark: results of a patient survey[J]. *BMC Health Serv Res.*, 2011, 11(1):262. DOI: 10.1186/1472-6963-11-262. [Pubmed: PMC3205034]
  22. Kaae S, Malaj A, Hoxha I. Antibiotic knowledge, attitudes and behaviours of Albanian health care professionals and patients – a qualitative interview study[J]. *J Pharm Policy Pract.* , 2017, 10(1):13. DOI: 10.1186/s40545-017-0102-1. [Pubmed: PMC5379499]
  23. Hawking M K, Lecky D M, Lundgren P T, et al. Attitudes and behaviours of adolescents towards antibiotics and self-care for respiratory tract infections: a qualitative study[J]. *Bmj Open*, 2017, 7(5):e015308. DOI: 1136/bmjopen-2016-015308. [Pubmed: 28592579]
  24. Hopkins S. *Cultural and Socioeconomic Determinants of Antibiotic Use[M]// Antibiotic Policies: Fighting Resistance*. Springer US, 2008:29-40.
  25. Gach O, Troisfontaines P, Legrand V. Identification of cultural determinants of antibiotic use cited in primary care in Europe: a mixed research synthesis study of integrated design “Culture is all around us”[J]. *Bmc Public Health*, 2015, 15(1):1-9.DOI: 10.1186/s12889-015-2254-8. [Pubmed: PMC4574721]
  26. Reynolds L, Mckee M. Factors influencing antibiotic prescribing in China: An exploratory analysis[J]. *Health Policy*, 2009, 90(1):32. DOI: 10.1016/j.healthpol.2008.09.002. [Pubmed:



- 18849089]
27. Cho HJ, Hong SJ, Park S. Knowledge and beliefs of primary care physicians, pharmacists, and parents on antibiotic use for the pediatric common cold. *Soc Sci Med* 2004;58:623–9. DOI: [org/10.1016/S0277-9536\(03\)00231-4](https://doi.org/10.1016/S0277-9536(03)00231-4) [Pubmed: 14652058]
  28. Ning R G, Min K, Zhen H Z. Analysis of the incidence and treatment of common cold in Guangzhou residents in 2006[J]. *Southern China preventive medicine*, 2008, 34(4):46-48.DOI: 1671 -5039( 2008) 04 -0046 -03
  29. Dong L, Yan H, Wang D. Antibiotic prescribing patterns in village health clinics across 10 provinces of Western China[J]. *Antimicrob Chemother* 2008;62:410–5.DOI: 10.1093/jac/dkn153. [Pubmed: 18400805]
  30. Wang J, Wang P, Wang X et al. Use and prescription of antibiotics in primary health care settings in China. *JAMA Intern Med*2014;174:1914–20. DOI: 10.1001/jamainternmed.2014.5214. [Pubmed: 25285394]
  31. Ebell M H, Lundgren J, Youngpairoj S. How long does a cough last? Comparing patients' expectations with data from a systematic review of the literature.[J]. *Annals of Family Medicine*, 2013, 11(1):5-13. DOI: 0.1370/afm.1430. [Pubmed: PMC3596033]
  32. Fashner J, Ericson K, Werner S. Treatment of the common cold in children and adults[J]. *American Family Physician*, 2012, 86(2):153. [Pubmed: 22962927]
  33. Arroll B, Kenealy T. Common cold.[J]. *Clin Evid*, 2008, 2008(12):1390-1391.
  34. Morris P S. Upper respiratory tract infections (including otitis media)[J]. *Pediatric Clinics of North America*, 2009, 56(1):101-117.DOI:10.1016/j.pcl.2008.10.009. [Pubmed: 19135583]
  35. Tim K. Sore throat[J]. *American Family Physician*, 2015, 91(10):689-90.
  36. Solberg L I, Braun B L, Fowles J B, et al. Care-seeking behavior for upper respiratory infections[J]. *Journal of Family Practice*, 2000, 49(10):915. [Pubmed: 19135583]
  37. Vijay S, Dalela G. Prevalence of LRTI in Patients Presenting with Productive Cough and Their Antibiotic Resistance Pattern[J]. *Journal of Clinical & Diagnostic Research Jcdr*, 2016, 10(1):DC09. DOI: 10.7860/JCDR/2016/17855.7082. [Pubmed: 26894065]
  38. Cabral C, Lucas P J, Ingram J, et al. "It's safer to ..." parent consulting and clinician antibiotic prescribing decisions for children with respiratory tract infections: An analysis across four qualitative studies[J]. *Social Science & Medicine*, 2015, 136-137(7700):156. DOI: 10.1016/j.socscimed.2015.05.027. [Pubmed: 26004209]
  39. Tan Y S, Hong C Y, Chong P N, et al. Knowledge that upper respiratory tract infection resolves on its own is associated with more appropriate health-seeking behavior and antibiotic cognition.[J]. *Singapore Medical Journal*, 2006, 47(6):518. DOI: 10.1016/j.socscimed.2015.05.027. [Pubmed: 16752021]
  40. Grigoryan L, Burgerhof J G M, Haaijerruskamp F M, et al. Is self-medication with antibiotics in Europe driven by prescribed use?[J]. *Journal of Antimicrobial Chemotherapy*, 2007, 59(1):152-6. DOI: 10.1093/jac/dk1457 [Pubmed: 17124192]
  41. Chang A B, Oppenheimer J J, Weinberger M, et al. Children With Chronic Wet or Productive Cough—Treatment and Investigations: A Systematic Review[J]. *Chest*, 2016, 149(1):120-142. DOI: 10.1378/chest.15-2065. [Pubmed: 26757284]

1  
2  
3  
4  
5  
6  
7  
8  
9  
10  
11  
12  
13  
14  
15  
16  
17  
18  
19  
20  
21  
22  
23  
24  
25  
26  
27  
28  
29  
30  
31  
32  
33  
34  
35  
36  
37  
38  
39  
40  
41  
42  
43  
44  
45  
46  
47  
48  
49  
50  
51  
52  
53  
54  
55  
56  
57  
58  
59  
60

P14-Figure 1 Flow chart describing symptoms, healthcare-seeking and antibiotics use among study population

P15-Figure 2 Trajectory of common symptoms experienced in the last time RTIs

P16-Figure 3 Symptom occurrence, peak and recovery by gender and days following onset of infection

P17-Table 1 Multivariate logistic regression models between service-seeking and specific symptoms

P18-Figure 4 Service-seeking by number of symptoms in total and by genders

For peer review only



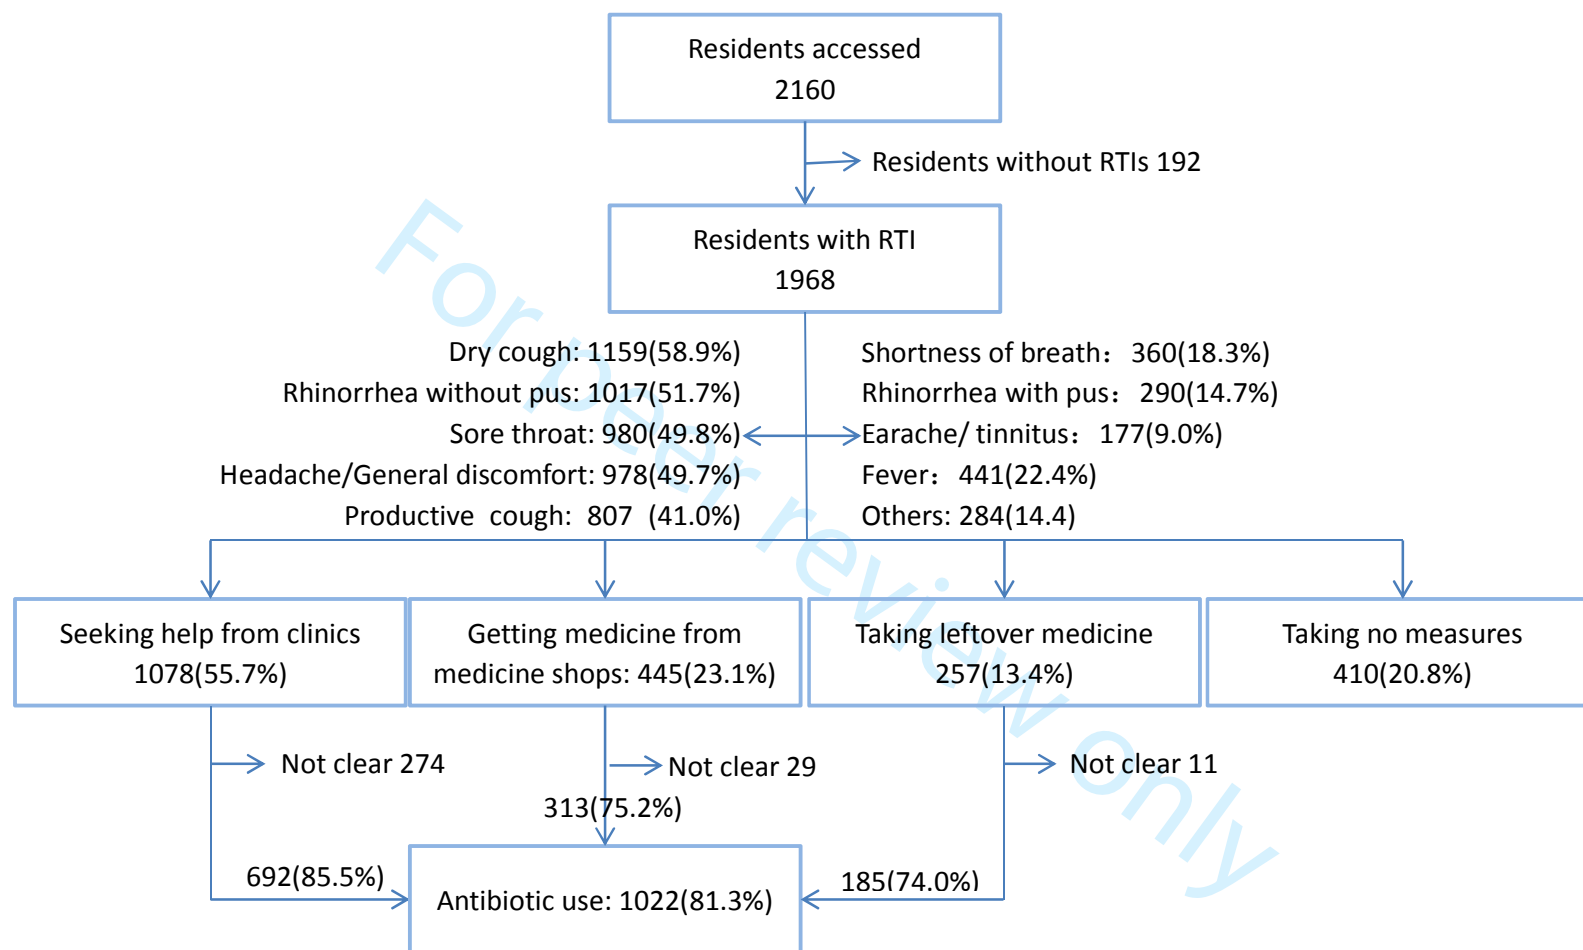

Figure 1 Flow chart describing symptoms, healthcare-seeking and antibiotics use among study population

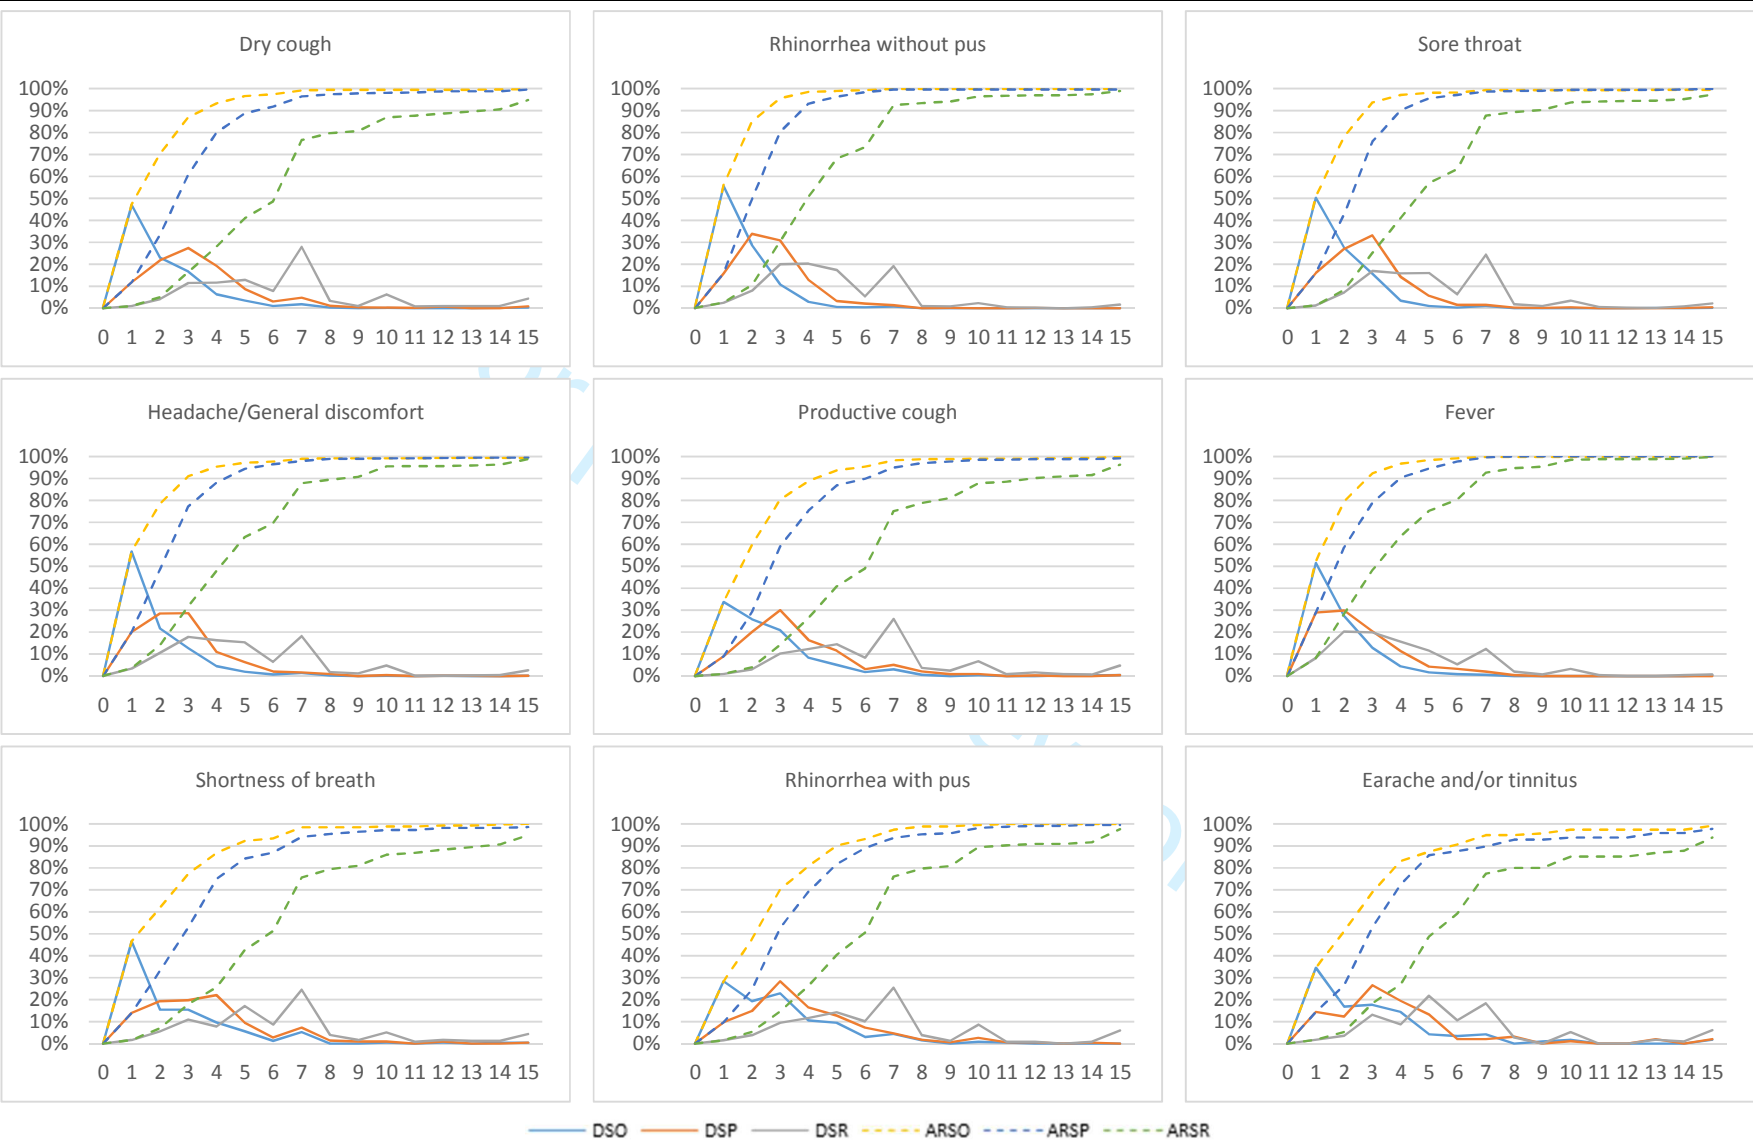

Figure2 Trajectory of common symptoms experienced in the last time RTIs (DSO: day on which symptom occurred; DSP: day on which symptom reached its peak or became most serious; DSR: day on which symptom recovered; ARSO: Accumulative rate of symptom occurrence; ARSP: Accumulative rate of symptom peak; ARSR: Accumulative rate of symptom recovery.

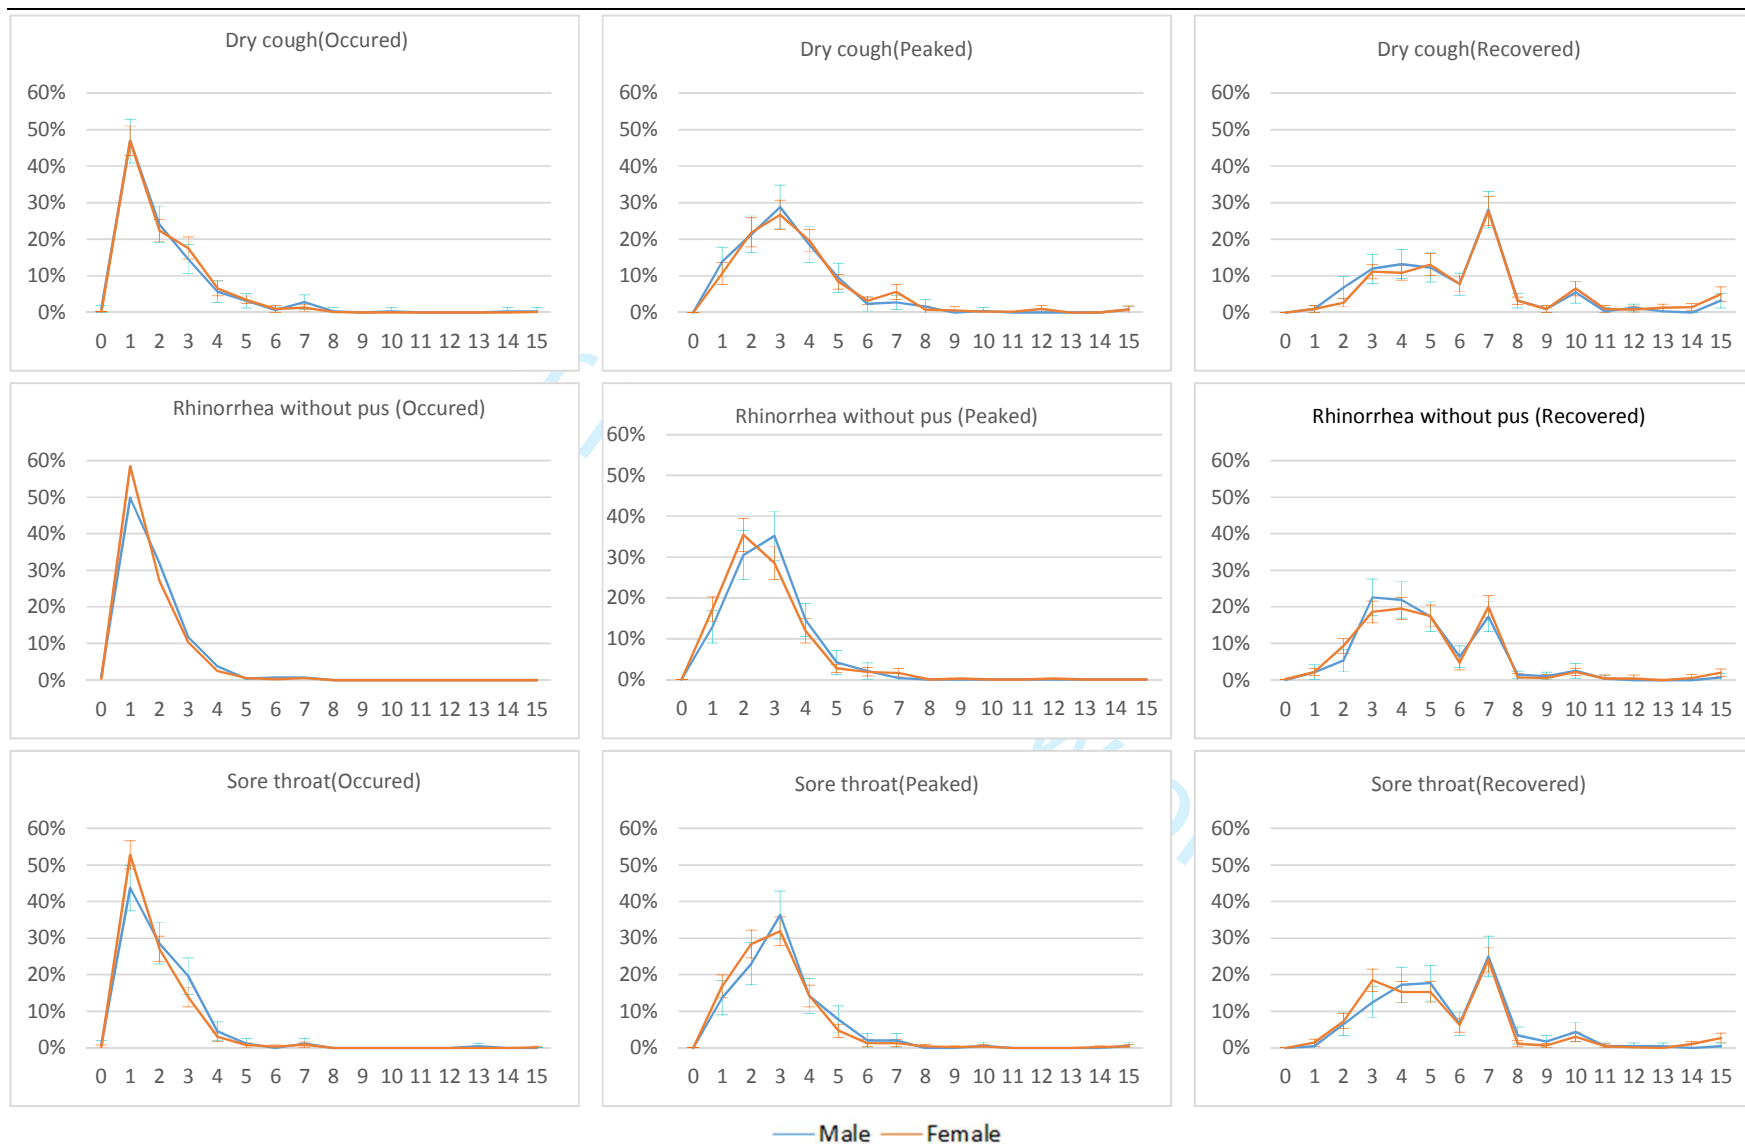

Figure 3 Symptom occurrence, peak and recovery by gender and days following onset of infection

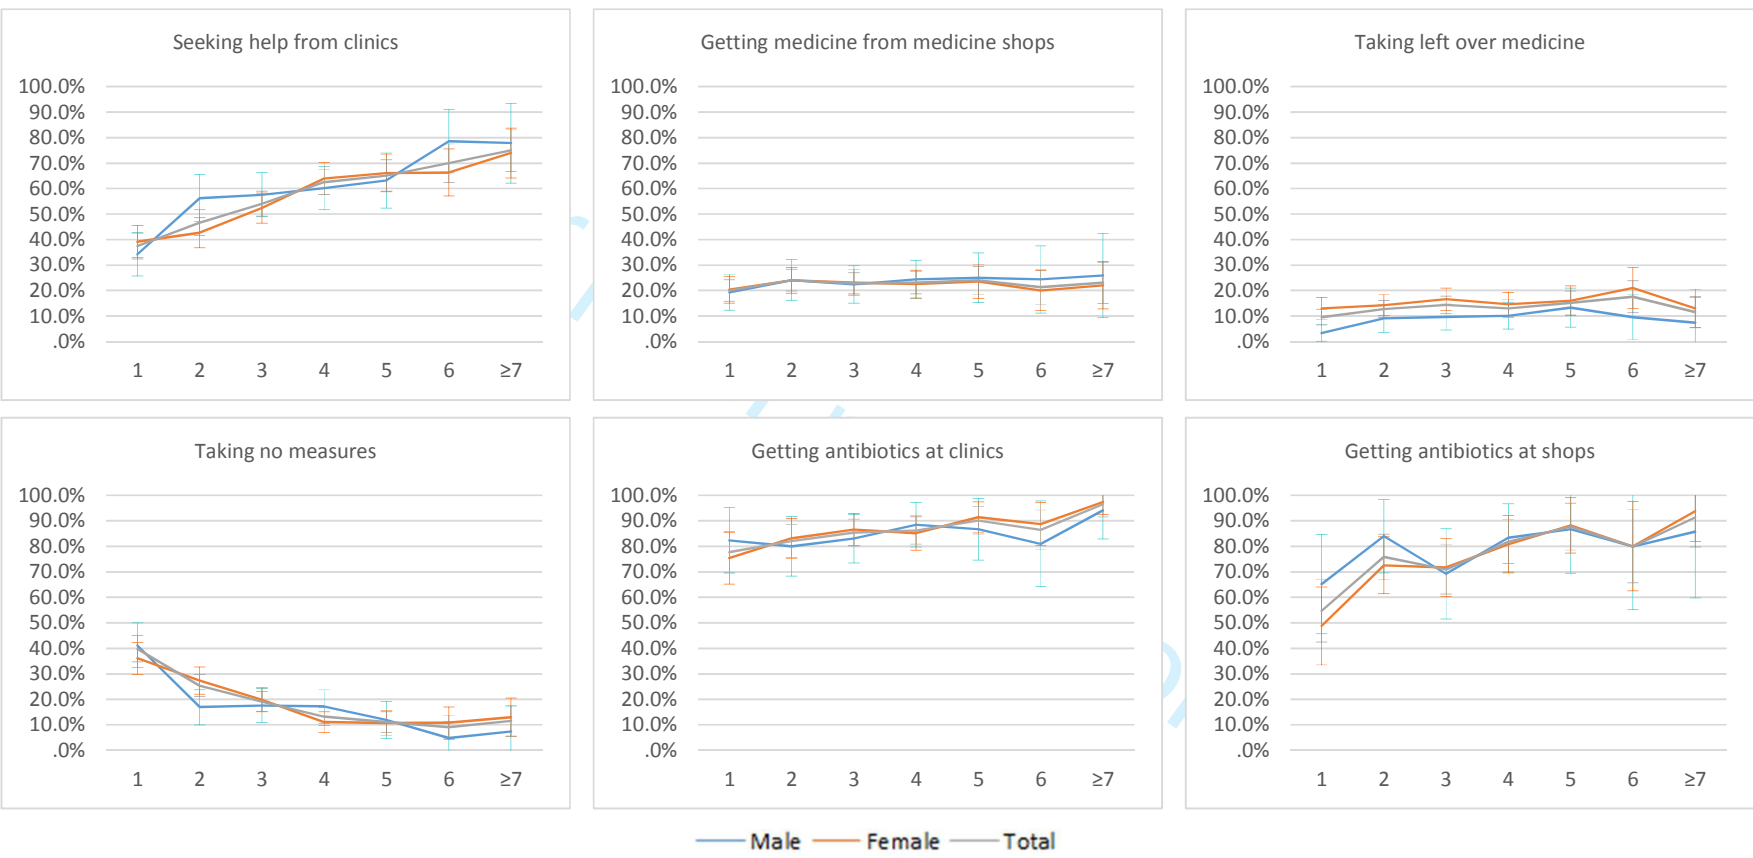

Figure 4 Service-seeking by number of symptoms in total and by genders

Table 1 Multivariate logistic regression models between service-seeking and specific symptoms

|                             | buying medicine from shops<br>(n1=1484,n2=445) |        |             | taking leftover medicine<br>(n1=1668, n2=257) |        |             | Seeking help from clinics<br>(n1=857,n2=1078) |        |             | Getting antibiotics at clinics<br>(n1=117, n2=692) |        |              | Getting antibiotics at shops<br>(n1=103, n2=313) |        |             |
|-----------------------------|------------------------------------------------|--------|-------------|-----------------------------------------------|--------|-------------|-----------------------------------------------|--------|-------------|----------------------------------------------------|--------|--------------|--------------------------------------------------|--------|-------------|
|                             | B                                              | Exp(B) | 95%CI       | B                                             | Exp(B) | 95%CI       | B                                             | Exp(B) | 95%CI       | B                                                  | Exp(B) | 95%CI        | B                                                | Exp(B) | 95%CI       |
| Gender                      | 0.081                                          | 1.085  | 0.840-1.400 | 0.701                                         | 2.016  | 1.411-2.881 | -0.200                                        | 0.819  | 0.653-1.027 | -0.049                                             | 0.952  | 0.592-1.532  | -0.147                                           | 0.863  | 0.497-1.498 |
| Age                         | -0.016                                         | 0.984  | 0.873-1.109 | -0.144                                        | 0.866  | 0.742-1.011 | 0.099                                         | 1.104  | 0.993-1.227 | -0.119                                             | 0.887  | 0.704-1.118  | 0.022                                            | 1.022  | 0.789-1.324 |
| Education                   | 0.207                                          | 1.230  | 1.068-1.417 | 0.249                                         | 1.283  | 1.073-1.535 | -0.235                                        | 0.790  | 0.697-0.896 | -0.164                                             | 0.849  | 0.646-1.114  | 0.124                                            | 1.133  | 0.842-1.523 |
| Sore throat                 | 0.016                                          | 1.016  | 0.810-1.275 | 0.264                                         | 1.303  | 0.971-1.748 | 0.303                                         | 1.355  | 1.109-1.654 | 0.718                                              | 2.050  | 1.337-3.143  | 0.472                                            | 1.604  | 0.990-2.599 |
| Rhinorrhea without pus      | -0.176                                         | 0.838  | 0.669-1.051 | 0.055                                         | 1.057  | 0.791-1.411 | 0.044                                         | 1.045  | 0.856-1.276 | 0.223                                              | 1.250  | 0.816-1.915  | -0.233                                           | 0.792  | 0.486-1.290 |
| Rhinorrhea with pus         | -0.040                                         | 0.960  | 0.714-1.292 | -0.249                                        | 0.780  | 0.531-1.145 | 0.044                                         | 1.045  | 0.804-1.359 | 0.013                                              | 1.013  | 0.566-1.813  | 0.585                                            | 1.796  | 0.869-3.711 |
| Dry cough                   | 0.373                                          | 1.452  | 1.124-1.875 | -0.213                                        | 0.809  | 0.587-1.114 | 0.400                                         | 1.492  | 1.198-1.859 | 0.276                                              | 1.318  | 0.812-2.140  | 0.284                                            | 1.328  | 0.777-2.269 |
| Productive cough            | 0.025                                          | 1.026  | 0.798-1.318 | 0.247                                         | 1.280  | 0.926-1.770 | 0.109                                         | 1.115  | 0.891-1.395 | -0.097                                             | 0.907  | 0.561-1.466  | 0.678                                            | 1.971  | 1.125-3.453 |
| Shortness of breath,        | -0.246                                         | 0.782  | 0.571-1.071 | -0.365                                        | 0.695  | 0.458-1.054 | 0.535                                         | 1.707  | 1.287-2.265 | -0.075                                             | 0.927  | 0.533-1.613  | 0.048                                            | 1.049  | 0.488-2.255 |
| Earache/tinnitus            | 0.351                                          | 1.421  | 0.979-2.063 | 0.266                                         | 1.305  | 0.825-2.063 | -0.278                                        | 0.757  | 0.535-1.072 | 1.586                                              | 4.884  | 1.162-20.522 | 0.398                                            | 1.489  | 0.608-3.648 |
| Headache general discomfort | 0.098                                          | 1.102  | 0.875-1.389 | 0.458                                         | 1.581  | 1.169-2.138 | 0.164                                         | 1.178  | 0.962-1.443 | 0.168                                              | 1.184  | 0.765-1.831  | 0.026                                            | 1.026  | 0.623-1.690 |
| Fever                       | -0.251                                         | 0.778  | 0.583-1.037 | 0.201                                         | 1.223  | 0.866-1.725 | 0.762                                         | 2.142  | 1.654-2.775 | 0.285                                              | 1.330  | 0.791-2.236  | 0.554                                            | 1.740  | 0.833-3.633 |
| Constant                    | -1.891                                         | 0.151  |             | -3.737                                        | 0.024  |             | 0.052                                         | 1.054  |             | 1.699                                              | 5.466  |              | 0.215                                            | 1.239  |             |

Note: n1 and n2 stands for the number of no and yes response respectively to each service use behavior; for each service use behavior, no (n1) was coded as 0 and yes(n2), as 1. Gender: 1=male,2=female; Age group: 1= ≤40y, 2=41-50y, 3=51-60y,4= ≥61y; Educatio:1=0 years,2=1-6 years ,3=7-9 years ,4=≥10 years. Symptoms: no= 0 and yes= 1.

Appendix 1 Characteristics of 1968 adults with respiratory tract infection

|           | Male      | Female    | Total     |
|-----------|-----------|-----------|-----------|
| Age       |           |           |           |
| 18-40y    | 128(20.3) | 317(23.7) | 445(22.6) |
| 41-50y    | 152(24.1) | 360(26.9) | 512(26.0) |
| 51-60y    | 134(21.3) | 323(24.1) | 457(23.3) |
| ≥61y      | 216(34.3) | 338(25.3) | 554(28.2) |
| Education |           |           |           |
| 0y        | 95(15.1)  | 487(36.4) | 582(29.6) |
| 1-6y      | 195(31.0) | 390(29.1) | 585(29.7) |
| 7-9y      | 269(42.7) | 360(26.9) | 629(32.0) |
| ≥10y      | 71(11.3)  | 101(7.5)  | 172(8.7)  |
| Total     | 630       | 1338      | 1968      |

BMJ peer review only

1  
2  
3  
4  
5  
6  
7  
8  
9  
10  
11  
12  
13  
14  
15  
16  
17  
18  
19  
20  
21  
22  
23  
24  
25  
26  
27  
28  
29  
30  
31  
32  
33  
34  
35  
36  
37  
38  
39  
40  
41  
42  
43  
44  
45  
46  
47

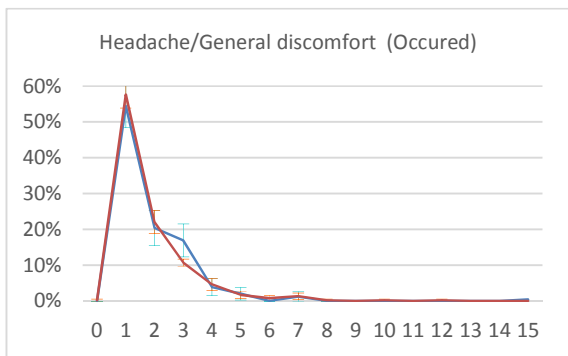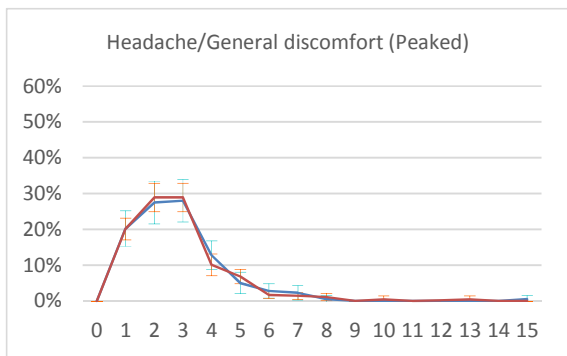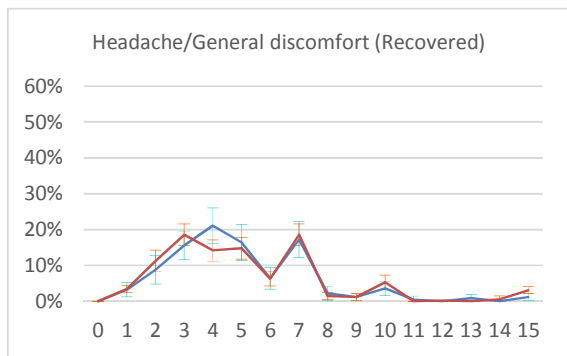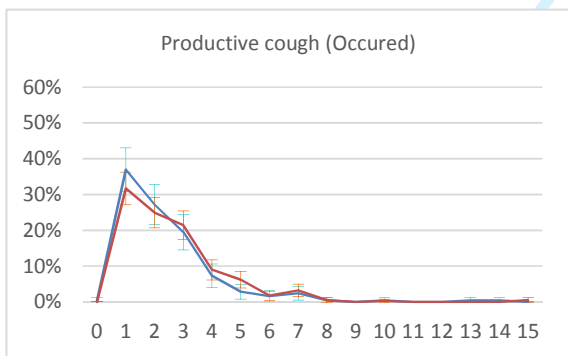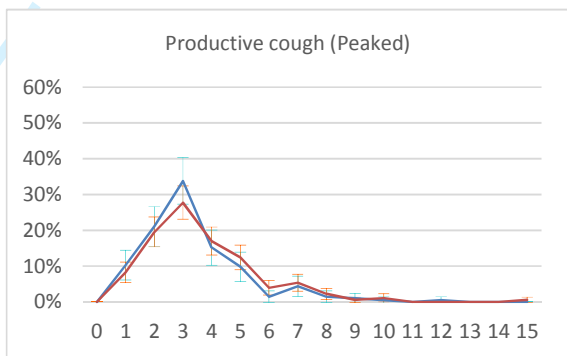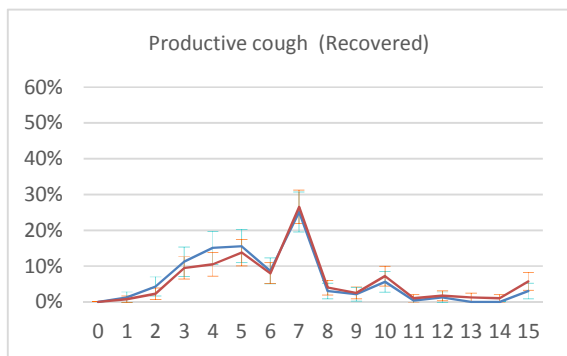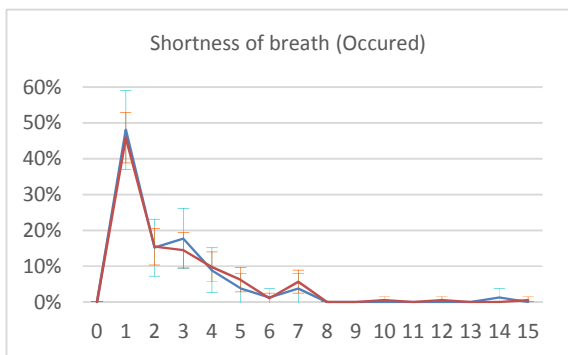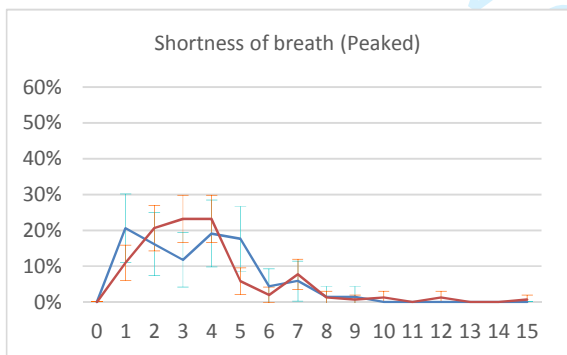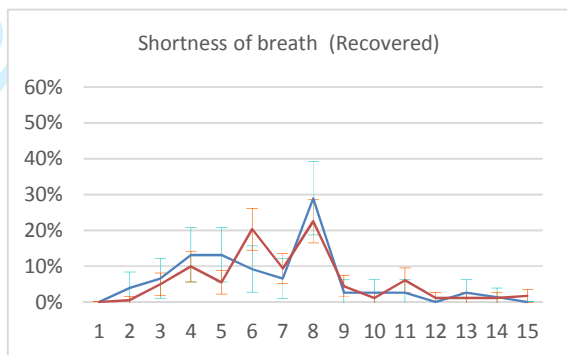



1  
2  
3  
4  
5  
6  
7  
8  
9  
10  
11  
12  
13  
14  
15  
16  
17  
18  
19  
20  
21  
22  
23  
24  
25  
26  
27  
28  
29  
30  
31  
32  
33  
34  
35  
36  
37  
38  
39  
40  
41  
42  
43  
44  
45  
46  
47

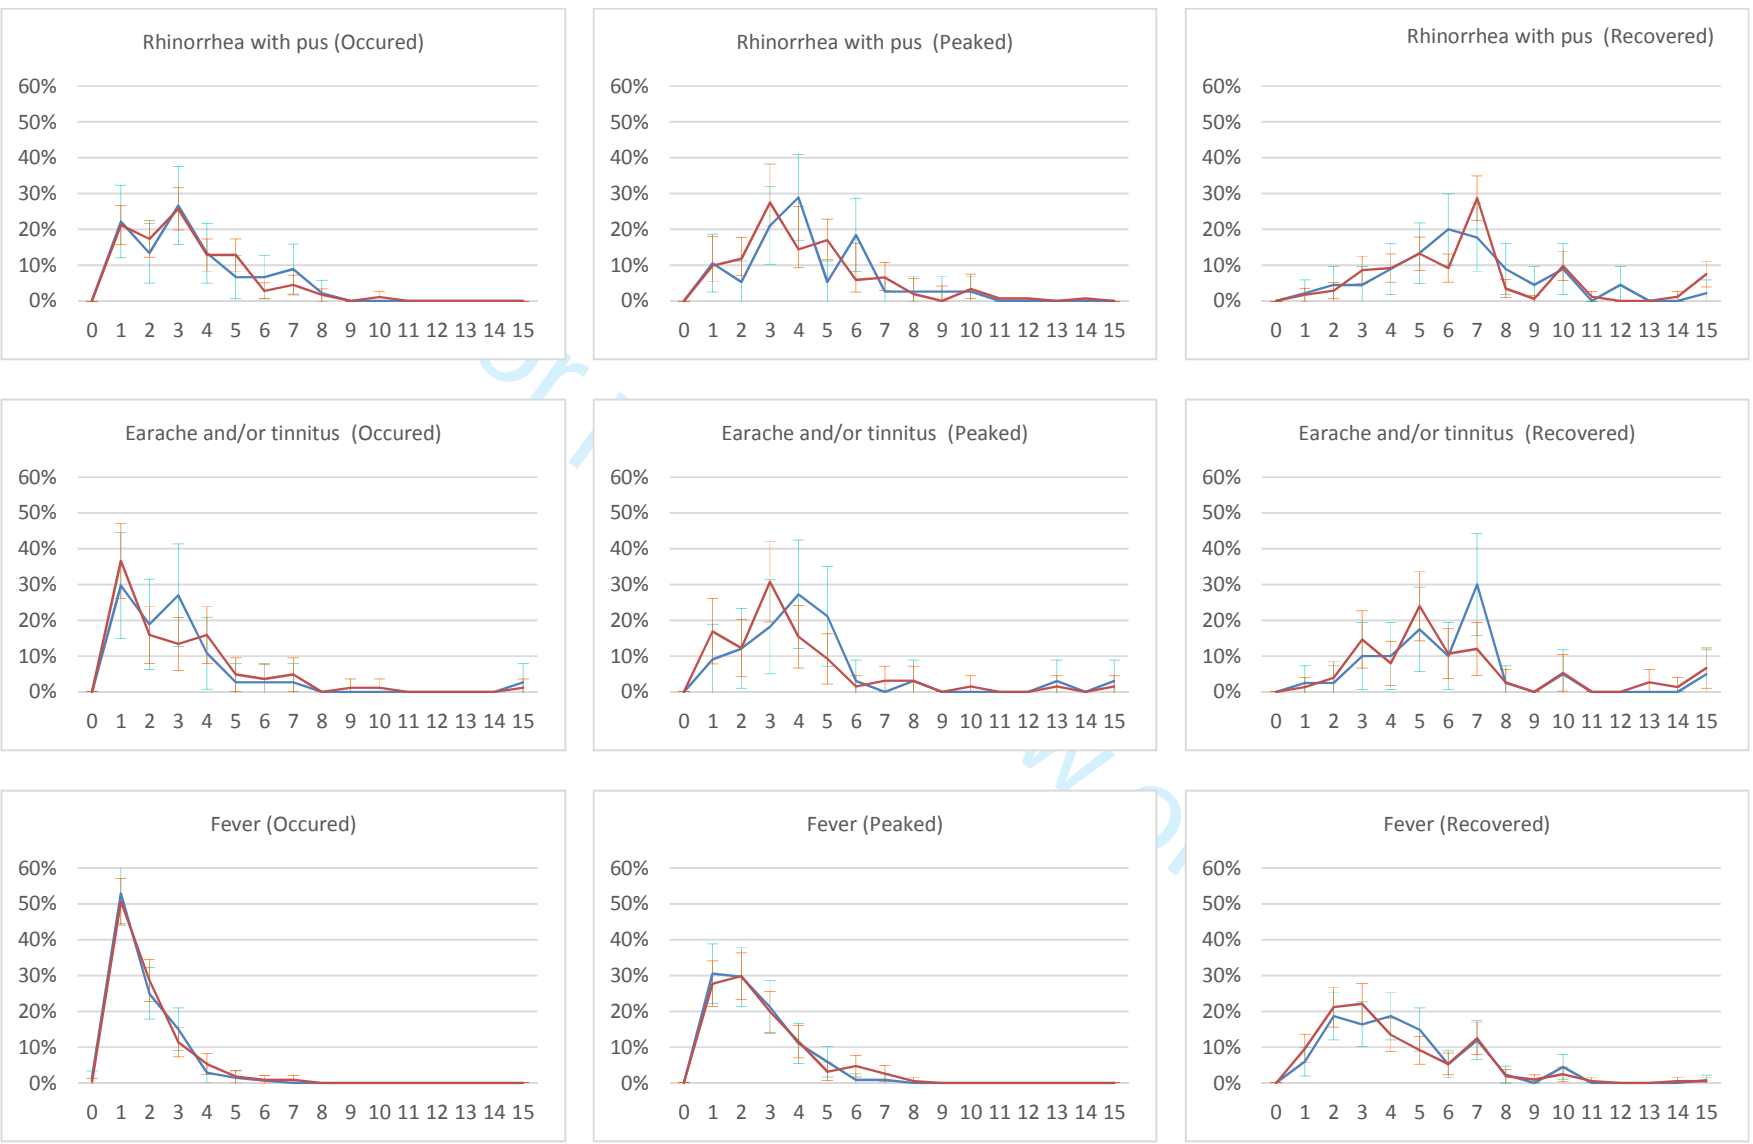

— Male — Female

Appendix 2 Symptom occurrence, peak and recovery by gender and days following onset of infection

1  
2  
3  
4  
5  
6  
7  
8  
9  
10  
11  
12  
13  
14  
15  
16  
17  
18  
19  
20  
21  
22  
23  
24  
25  
26  
27  
28  
29  
30  
31  
32  
33  
34  
35  
36  
37  
38  
39  
40  
41  
42  
43  
44  
45  
46  
47

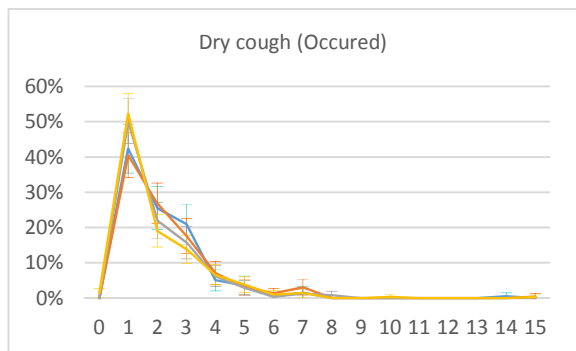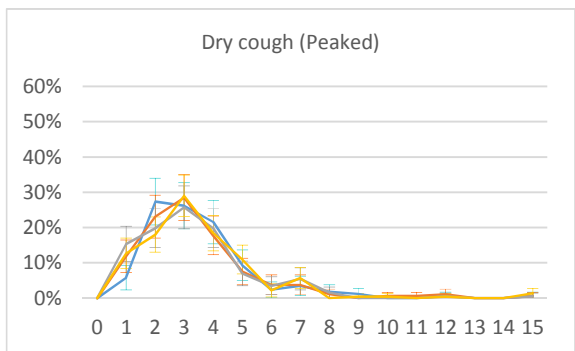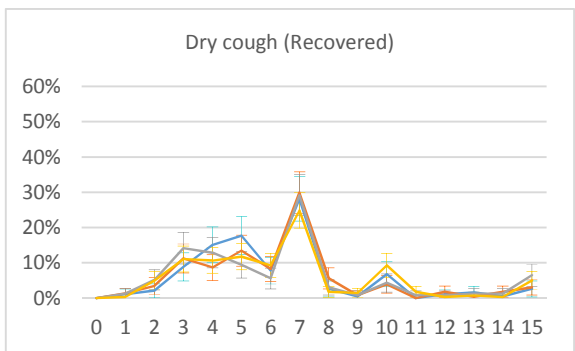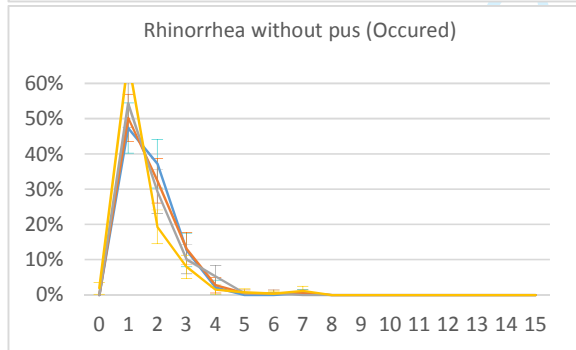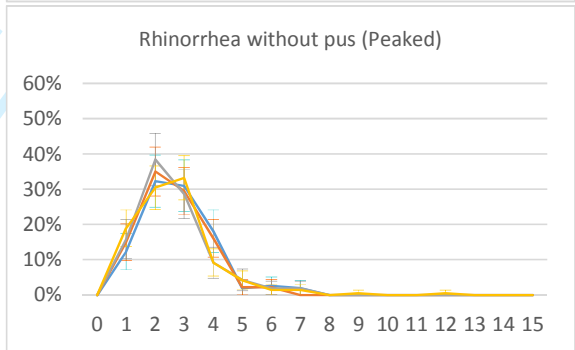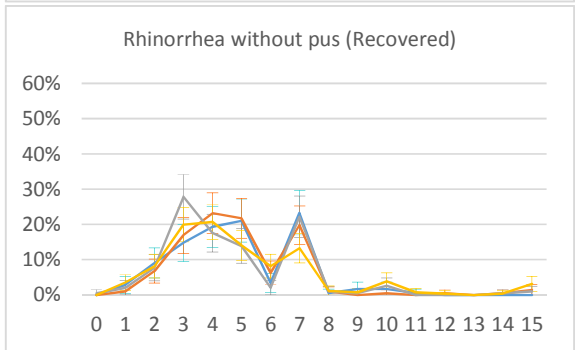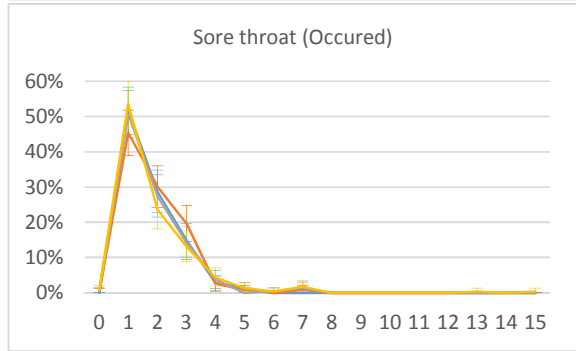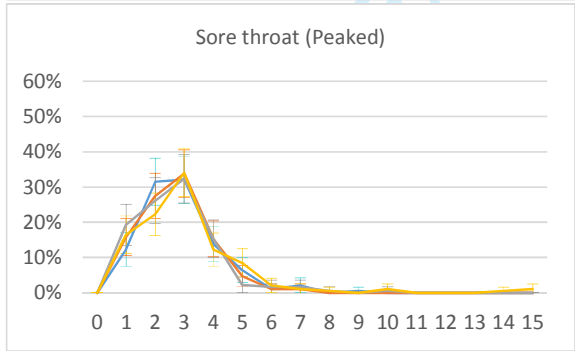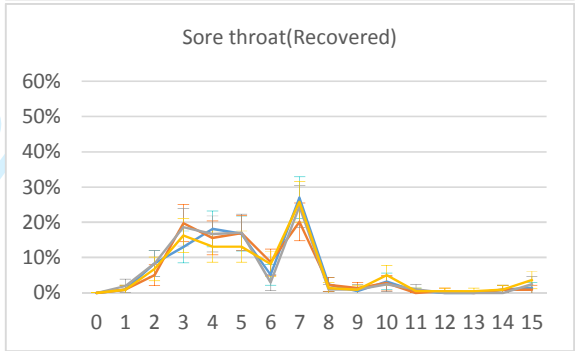

1  
2  
3  
4  
5  
6  
7  
8  
9  
10  
11  
12  
13  
14  
15  
16  
17  
18  
19  
20  
21  
22  
23  
24  
25  
26  
27  
28  
29  
30  
31  
32  
33  
34  
35  
36  
37  
38  
39  
40  
41  
42  
43  
44  
45  
46  
47

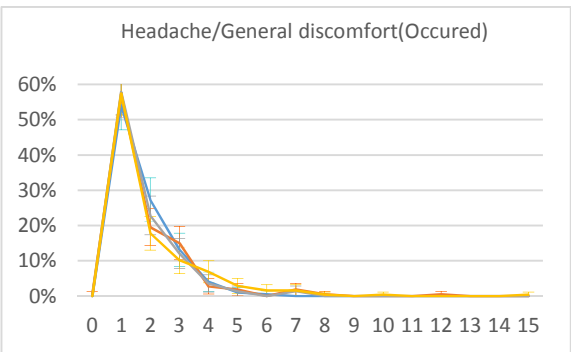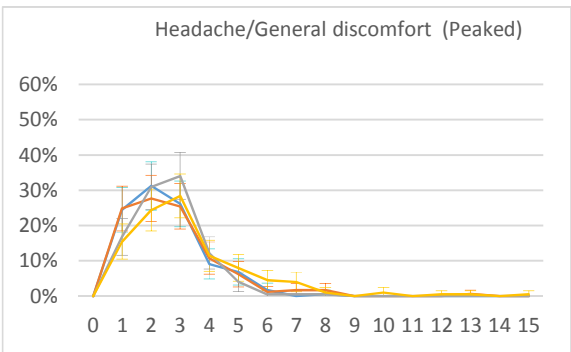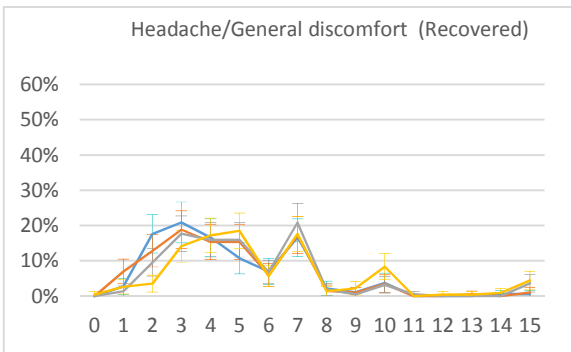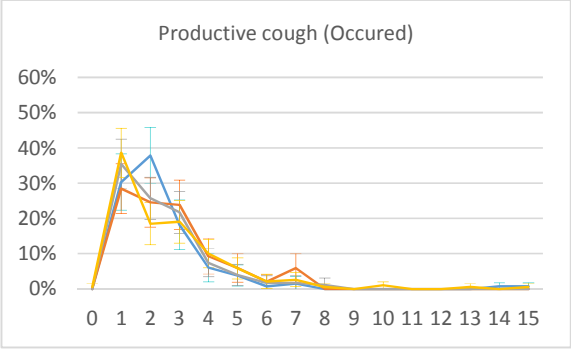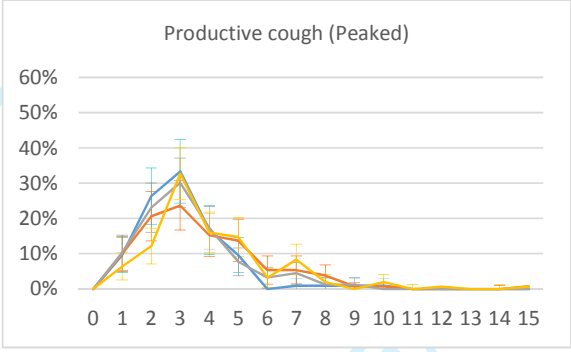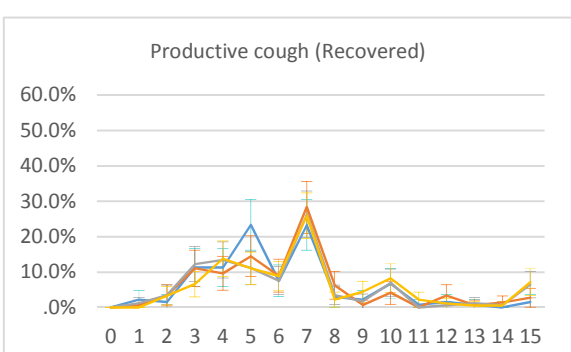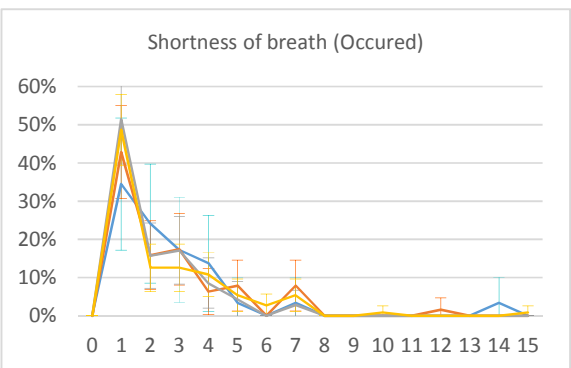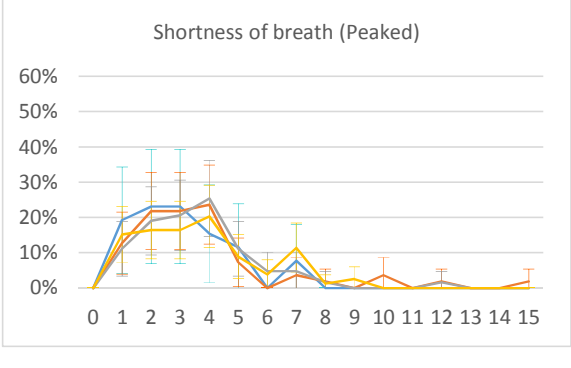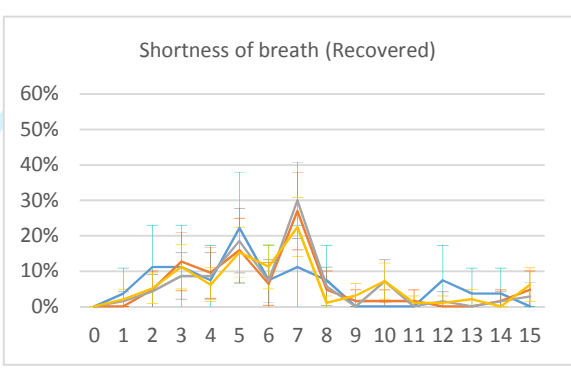

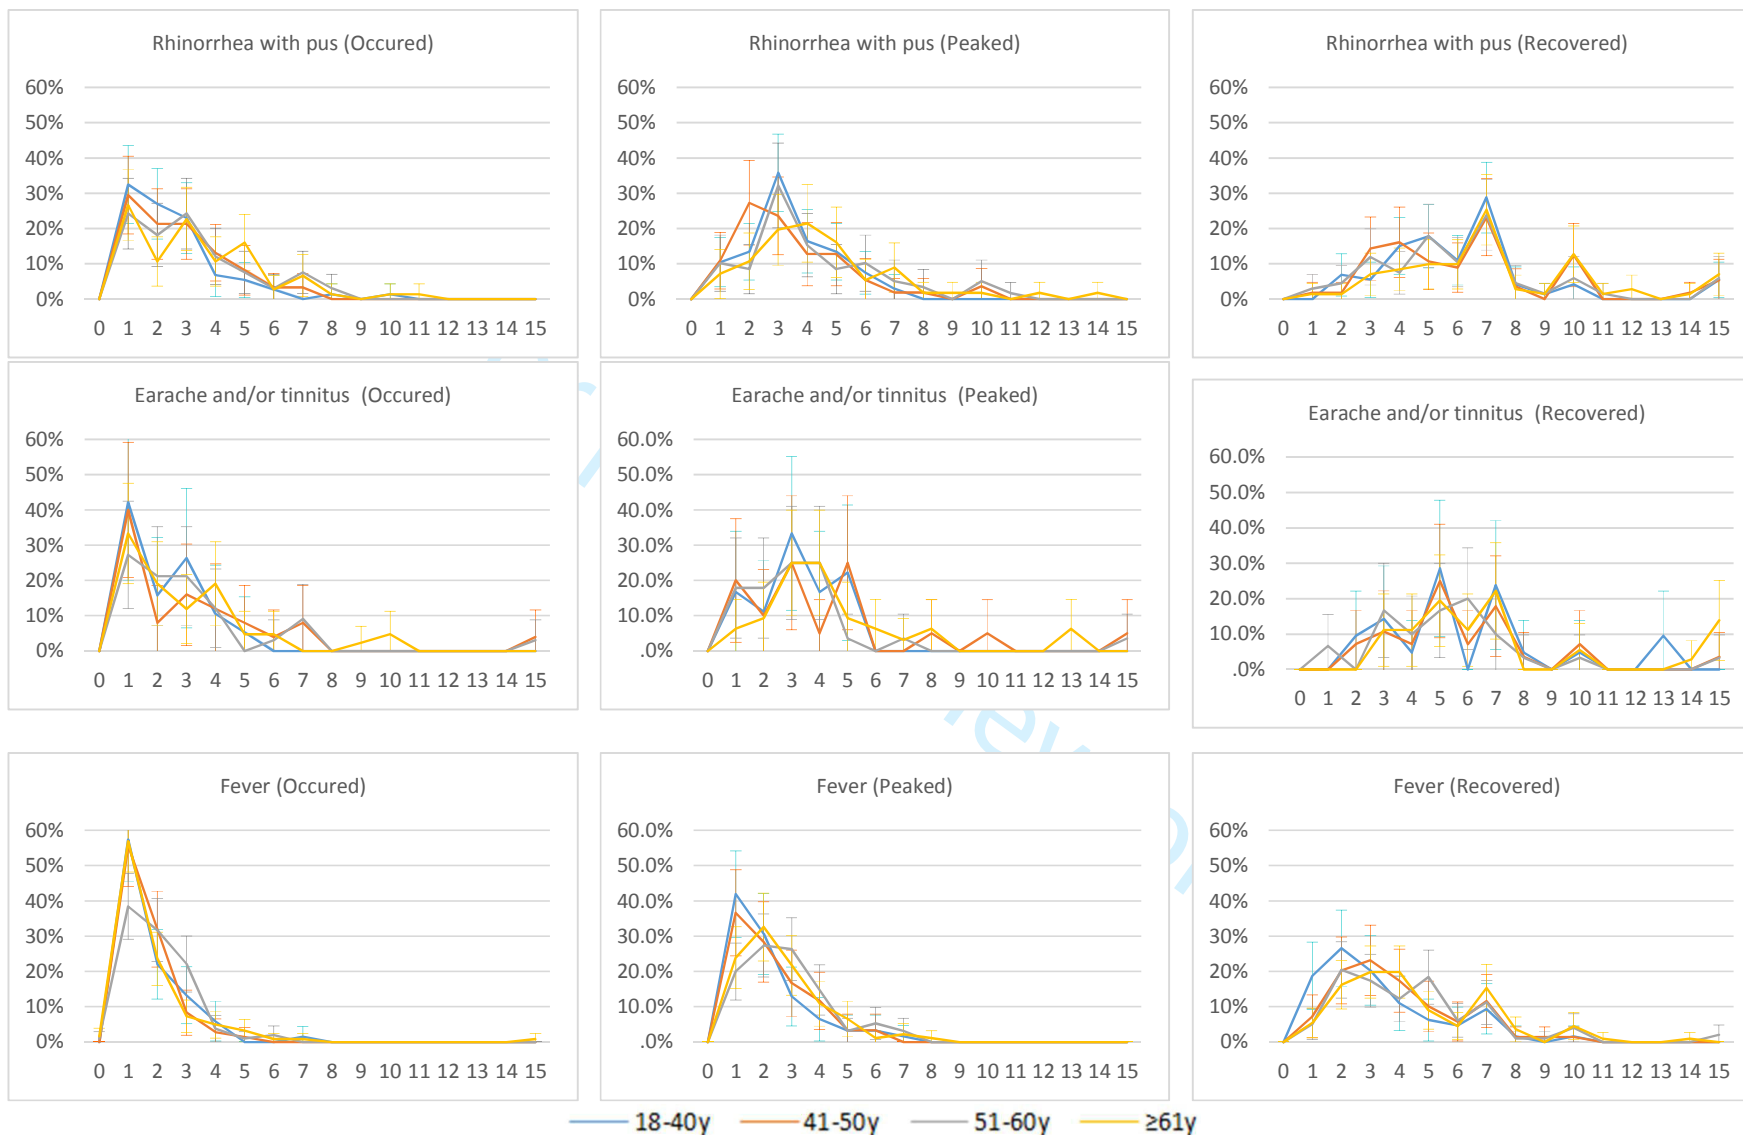

Appendix 3 Symptom occurrence, peak and recovery by age and days following onset of infection

1  
2  
3  
4  
5  
6  
7  
8  
9  
10  
11  
12  
13  
14  
15  
16  
17  
18  
19  
20  
21  
22  
23  
24  
25  
26  
27  
28  
29  
30  
31  
32  
33  
34  
35  
36  
37  
38  
39  
40  
41  
42  
43  
44  
45  
46  
47

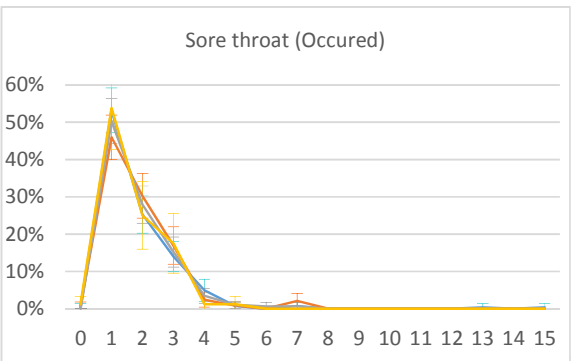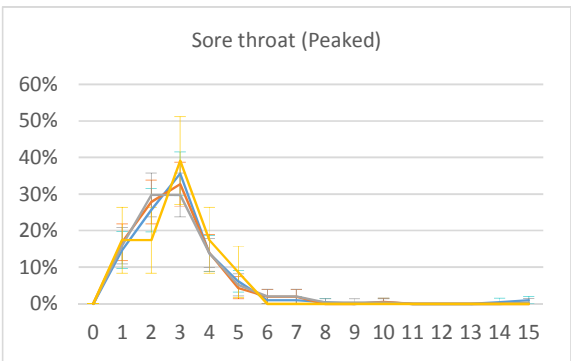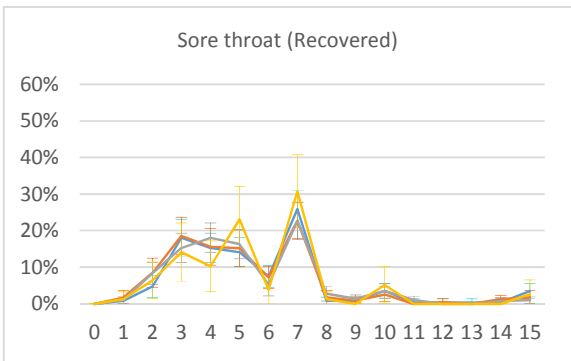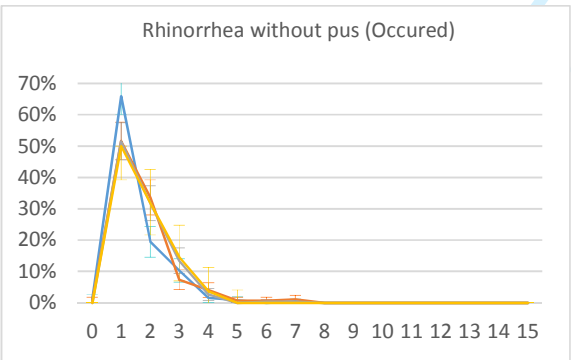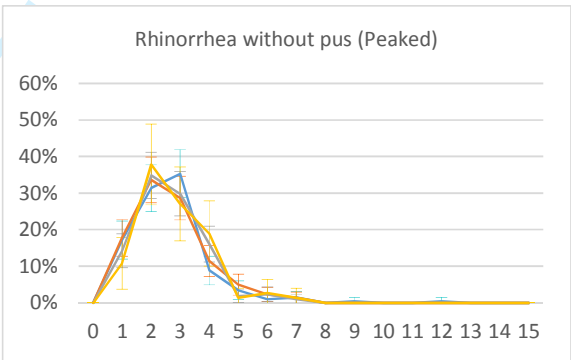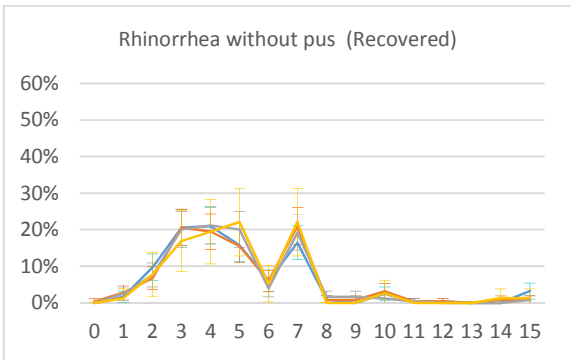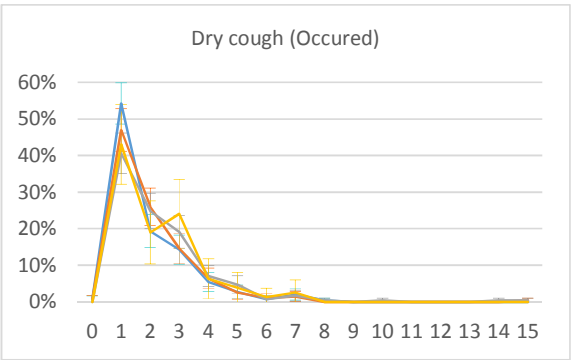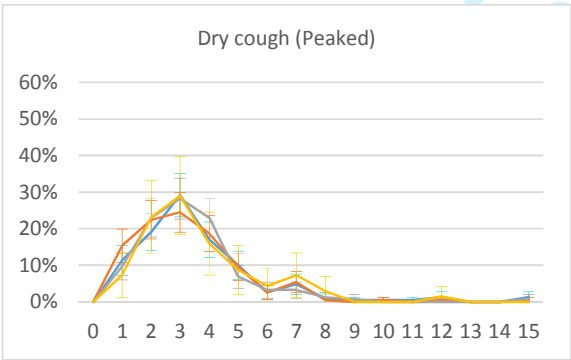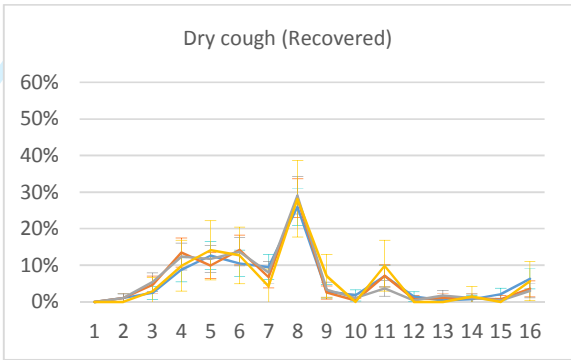

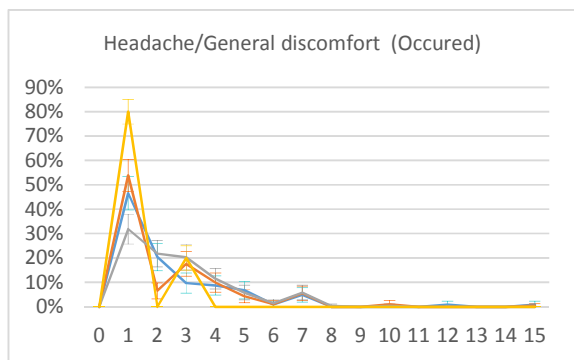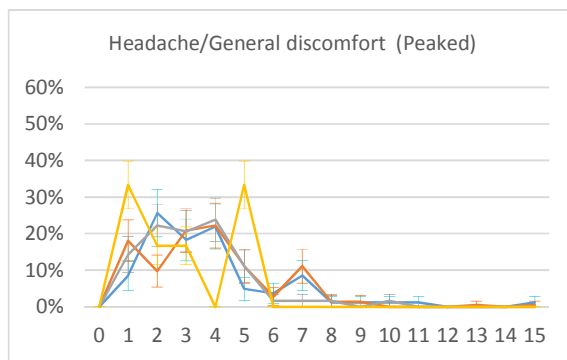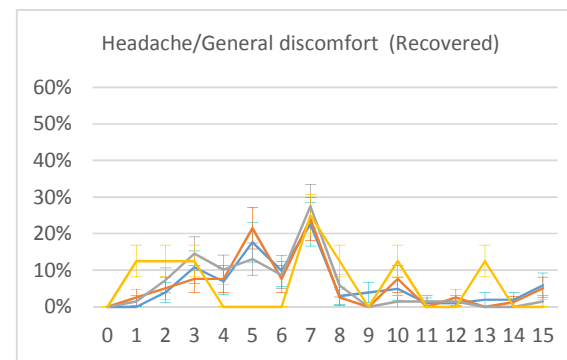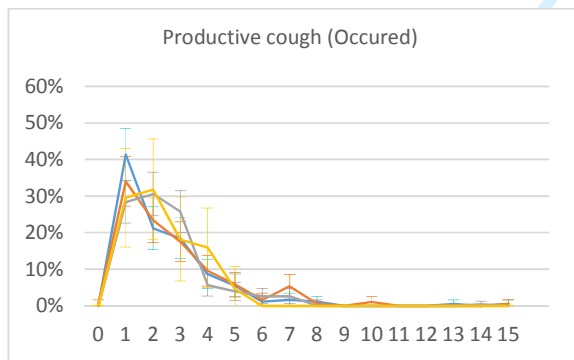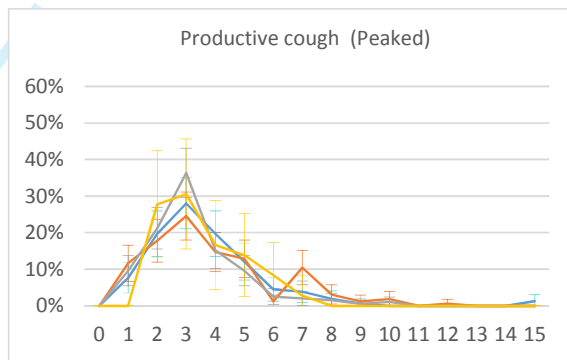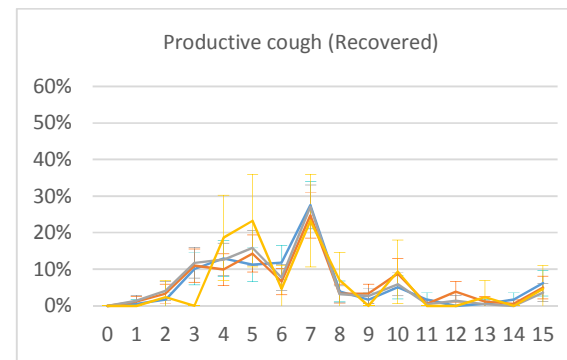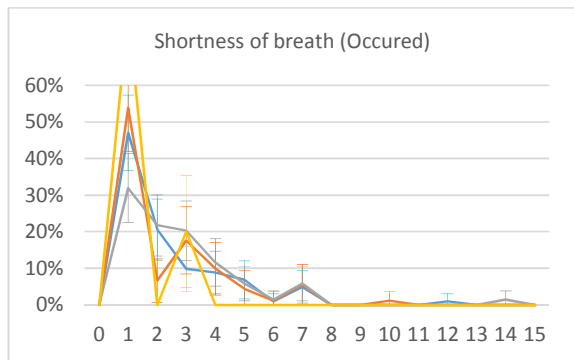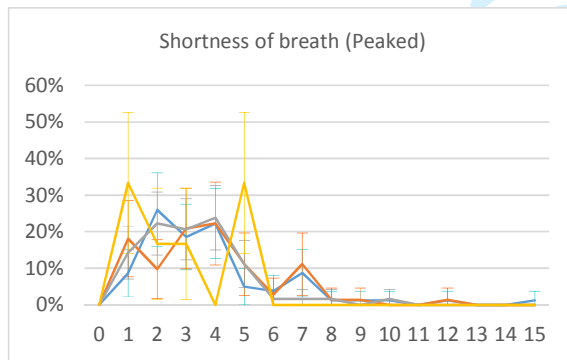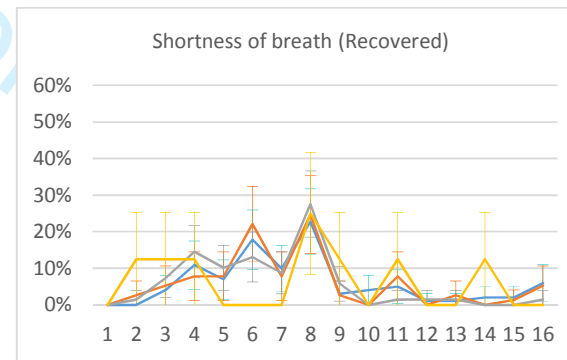

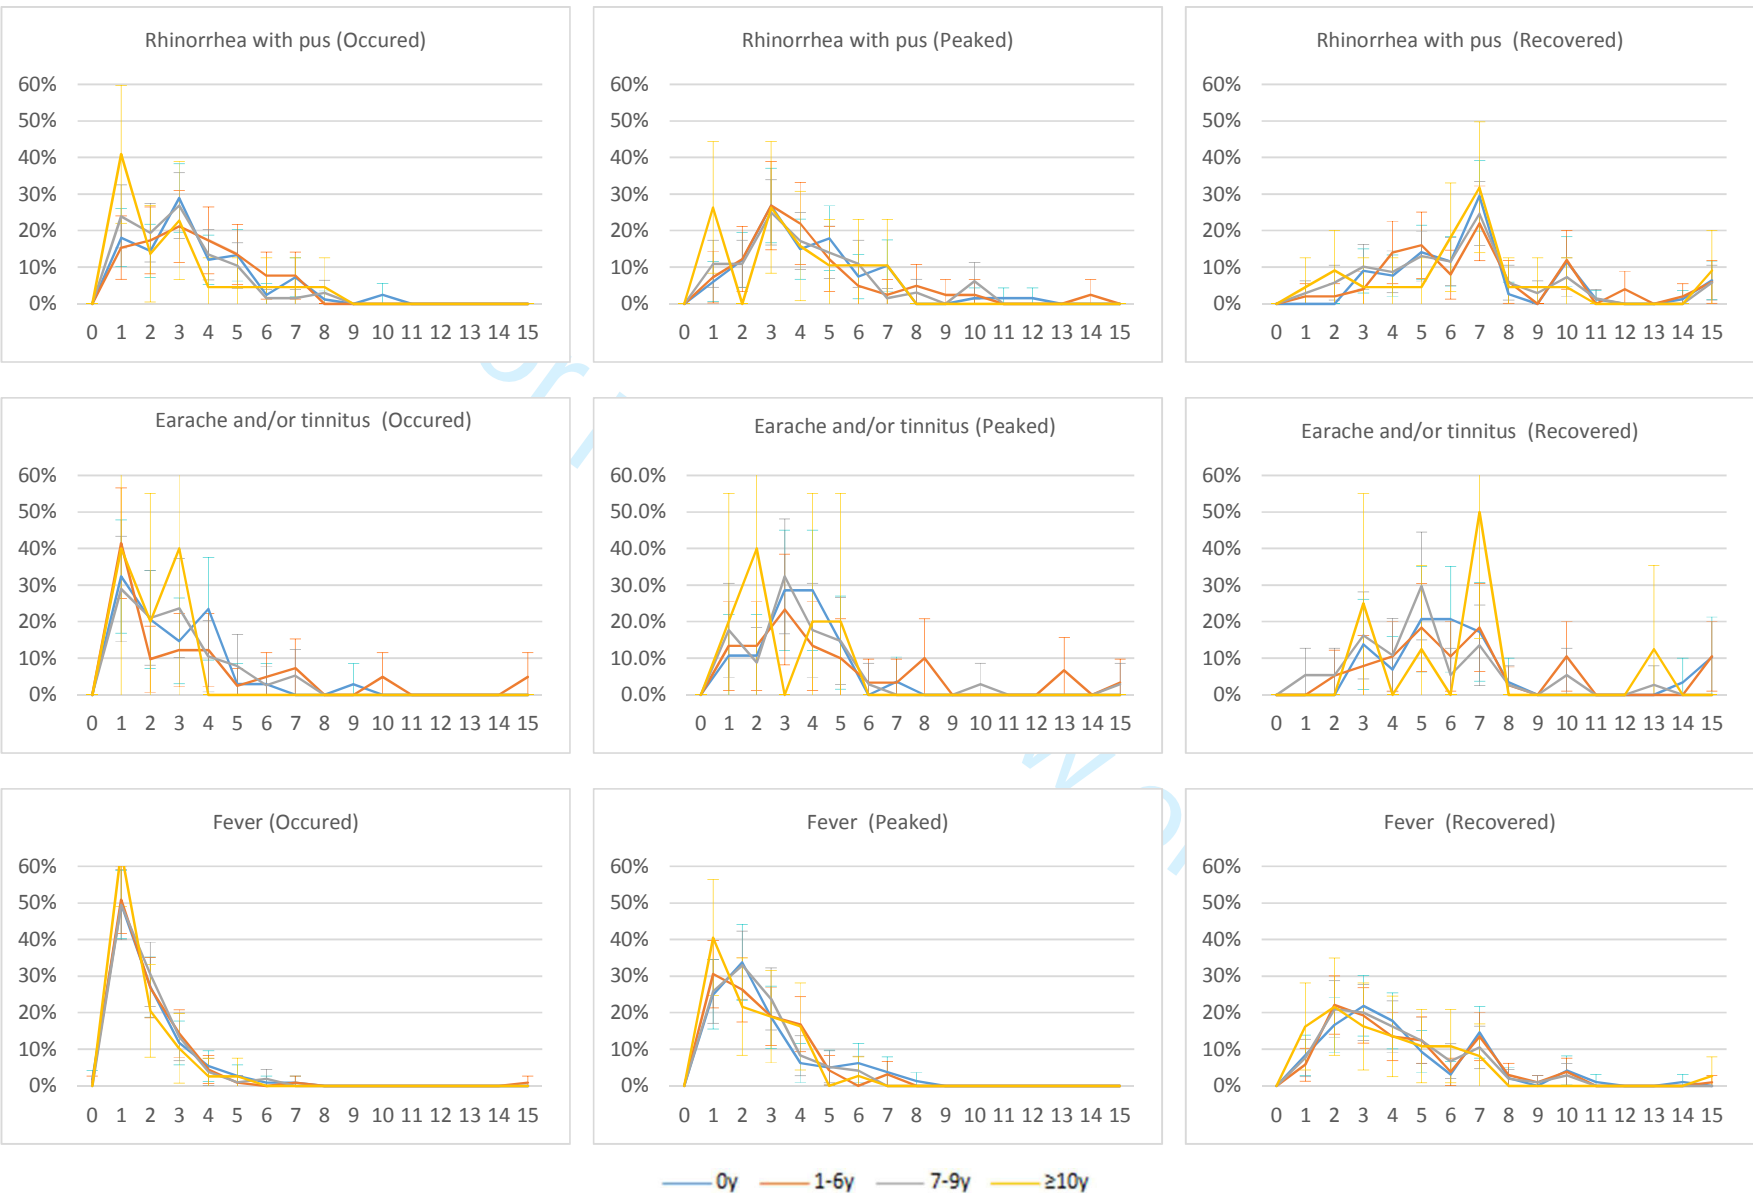

Appendix 4 Symptom occurrence, peak and recovery by education and days following onset of infection

1  
2  
3  
4  
5  
6  
7  
8  
9  
10  
11  
12  
13  
14  
15  
16  
17  
18  
19  
20  
21  
22  
23  
24  
25  
26  
27  
28  
29  
30  
31  
32  
33  
34  
35  
36  
37  
38  
39  
40  
41  
42  
43  
44  
45  
46  
47



1  
2  
3  
4  
5  
6  
7  
8  
9  
10  
11  
12  
13  
14  
15  
16  
17  
18  
19  
20  
21  
22  
23  
24  
25  
26  
27  
28  
29  
30  
31  
32  
33  
34  
35  
36  
37  
38  
39  
40  
41  
42  
43  
44  
45  
46  
47

For peer review only

**STROBE 2007 (v4) Statement—Checklist of items that should be included in reports of *cross-sectional studies***

| Section/Topic                | Item # | Recommendation                                                                                                                                                                       | Reported on page # |
|------------------------------|--------|--------------------------------------------------------------------------------------------------------------------------------------------------------------------------------------|--------------------|
| <b>Title and abstract</b>    | 1      | (a) Indicate the study's design with a commonly used term in the title or the abstract                                                                                               | P1                 |
|                              |        | (b) Provide in the abstract an informative and balanced summary of what was done and what was found                                                                                  | P2                 |
| <b>Introduction</b>          |        |                                                                                                                                                                                      |                    |
| Background/rationale         | 2      | Explain the scientific background and rationale for the investigation being reported                                                                                                 | P3-4               |
| Objectives                   | 3      | State specific objectives, including any prespecified hypotheses                                                                                                                     | P4                 |
| <b>Methods</b>               |        |                                                                                                                                                                                      |                    |
| Study design                 | 4      | Present key elements of study design early in the paper                                                                                                                              | P4-5               |
| Setting                      | 5      | Describe the setting, locations, and relevant dates, including periods of recruitment, exposure, follow-up, and data collection                                                      | P4-5               |
| Participants                 | 6      | (a) Give the eligibility criteria, and the sources and methods of selection of participants                                                                                          | P4-5               |
| Variables                    | 7      | Clearly define all outcomes, exposures, predictors, potential confounders, and effect modifiers. Give diagnostic criteria, if applicable                                             | P4-5               |
| Data sources/<br>measurement | 8*     | For each variable of interest, give sources of data and details of methods of assessment (measurement). Describe comparability of assessment methods if there is more than one group | P4-5               |
| Bias                         | 9      | Describe any efforts to address potential sources of bias                                                                                                                            | P4-5               |
| Study size                   | 10     | Explain how the study size was arrived at                                                                                                                                            | P4-5               |
| Quantitative variables       | 11     | Explain how quantitative variables were handled in the analyses. If applicable, describe which groupings were chosen and why                                                         | P17                |
| Statistical methods          | 12     | (a) Describe all statistical methods, including those used to control for confounding                                                                                                | P4                 |
|                              |        | (b) Describe any methods used to examine subgroups and interactions                                                                                                                  | NA                 |
|                              |        | (c) Explain how missing data were addressed                                                                                                                                          | P5                 |
|                              |        | (d) If applicable, describe analytical methods taking account of sampling strategy                                                                                                   | P4                 |
|                              |        | (e) Describe any sensitivity analyses                                                                                                                                                | NA                 |
| <b>Results</b>               |        |                                                                                                                                                                                      |                    |

|                          |     |                                                                                                                                                                                                              |        |
|--------------------------|-----|--------------------------------------------------------------------------------------------------------------------------------------------------------------------------------------------------------------|--------|
| Participants             | 13* | (a) Report numbers of individuals at each stage of study—eg numbers potentially eligible, examined for eligibility, confirmed eligible, included in the study, completing follow-up, and analysed            | P4, 14 |
|                          |     | (b) Give reasons for non-participation at each stage                                                                                                                                                         | P14    |
|                          |     | (c) Consider use of a flow diagram                                                                                                                                                                           | P14    |
| Descriptive data         | 14* | (a) Give characteristics of study participants (eg demographic, clinical, social) and information on exposures and potential confounders                                                                     | P5     |
|                          |     | (b) Indicate number of participants with missing data for each variable of interest                                                                                                                          | P14    |
| Outcome data             | 15* | Report numbers of outcome events or summary measures                                                                                                                                                         | P5-7   |
| Main results             | 16  | (a) Give unadjusted estimates and, if applicable, confounder-adjusted estimates and their precision (eg, 95% confidence interval). Make clear which confounders were adjusted for and why they were included | P5-7   |
|                          |     | (b) Report category boundaries when continuous variables were categorized                                                                                                                                    | P17    |
|                          |     | (c) If relevant, consider translating estimates of relative risk into absolute risk for a meaningful time period                                                                                             | P17    |
| Other analyses           | 17  | Report other analyses done—eg analyses of subgroups and interactions, and sensitivity analyses                                                                                                               | NA     |
| <b>Discussion</b>        |     |                                                                                                                                                                                                              |        |
| Key results              | 18  | Summarise key results with reference to study objectives                                                                                                                                                     | P7     |
| Limitations              | 19  | Discuss limitations of the study, taking into account sources of potential bias or imprecision. Discuss both direction and magnitude of any potential bias                                                   | P9     |
| Interpretation           | 20  | Give a cautious overall interpretation of results considering objectives, limitations, multiplicity of analyses, results from similar studies, and other relevant evidence                                   | P7-9   |
| Generalisability         | 21  | Discuss the generalisability (external validity) of the study results                                                                                                                                        | P9     |
| <b>Other information</b> |     |                                                                                                                                                                                                              |        |
| Funding                  | 22  | Give the source of funding and the role of the funders for the present study and, if applicable, for the original study on which the present article is based                                                | P9     |

\*Give information separately for cases and controls in case-control studies and, if applicable, for exposed and unexposed groups in cohort and cross-sectional studies.

**Note:** An Explanation and Elaboration article discusses each checklist item and gives methodological background and published examples of transparent reporting. The STROBE checklist is best used in conjunction with this article (freely available on the Web sites of PLoS Medicine at <http://www.plosmedicine.org/>, Annals of Internal Medicine at <http://www.annals.org/>, and Epidemiology at <http://www.epidem.com/>). Information on the STROBE Initiative is available at [www.strobe-statement.org](http://www.strobe-statement.org).

# BMJ Open

## How patients' experiences of respiratory tract infections affect healthcare seeking and antibiotic use: Insights from a cross sectional survey in rural Anhui, China

|                                 |                                                                                                                                                                                                                                                                                                                                                                                                                                                                                                                                                                                                                                                                                                                                                |
|---------------------------------|------------------------------------------------------------------------------------------------------------------------------------------------------------------------------------------------------------------------------------------------------------------------------------------------------------------------------------------------------------------------------------------------------------------------------------------------------------------------------------------------------------------------------------------------------------------------------------------------------------------------------------------------------------------------------------------------------------------------------------------------|
| Journal:                        | <i>BMJ Open</i>                                                                                                                                                                                                                                                                                                                                                                                                                                                                                                                                                                                                                                                                                                                                |
| Manuscript ID                   | bmjopen-2017-019492.R1                                                                                                                                                                                                                                                                                                                                                                                                                                                                                                                                                                                                                                                                                                                         |
| Article Type:                   | Research                                                                                                                                                                                                                                                                                                                                                                                                                                                                                                                                                                                                                                                                                                                                       |
| Date Submitted by the Author:   | 21-Nov-2017                                                                                                                                                                                                                                                                                                                                                                                                                                                                                                                                                                                                                                                                                                                                    |
| Complete List of Authors:       | Diao, MengJie; Anhui Medical University School of Health Service Management<br>Shen, Xingrong; Anhui Medical University, School of Health Service Management<br>Cheng, Jing; Anhui Medical University, School of Health Service Management<br>Chai, Jing; Anhui Medical University, School of Health Service Management<br>Feng, Rui; Anhui Medical University, Library Department of Literature Retrieval and Analysis<br>Panpan, Zhang; Anhui Medical University, School of Health Service Management<br>Rongyao, Zhou; Anhui Medical University, Anhui Medical University<br>Lambert, Helen; University of Bristol, Department of Population Health Sciences<br>Wang, DeBin; Anhui Medical University, School of Health Services Management |
| <b>Primary Subject Heading</b>: | Health services research                                                                                                                                                                                                                                                                                                                                                                                                                                                                                                                                                                                                                                                                                                                       |
| Secondary Subject Heading:      | Public health, Epidemiology, Health services research                                                                                                                                                                                                                                                                                                                                                                                                                                                                                                                                                                                                                                                                                          |
| Keywords:                       | Respiratory tract infection, Healthcare-seeking behavior, Rural residents, Antibiotics                                                                                                                                                                                                                                                                                                                                                                                                                                                                                                                                                                                                                                                         |
|                                 |                                                                                                                                                                                                                                                                                                                                                                                                                                                                                                                                                                                                                                                                                                                                                |

SCHOLARONE™  
Manuscripts

1           **How patients' experiences of respiratory tract infections affect**  
2           **healthcare seeking and antibiotic use: Insights from a cross sectional**  
3           **survey in rural Anhui, China**

4 Mengjie Diao\*, Xingrong Shen, Jing Cheng, Jing Chai, Rui Feng, Panpan zhang,  
5 Rongyao Zhou, Helen Lambert, Debin Wang<sup>#</sup>

6 **Corresponding author: Debin Wang.**

7 Post address: 81 Meishan Road, Hefei, Anhui, China, 230032.

8 Email: [dbwang@vip.sina.com](mailto:dbwang@vip.sina.com);

9 Tel/Fax: (0086) 0551-6511-6395.

10 **Mengjie Diao:** School of Health Service Management, Anhui Medical University,  
11 Hefei, Anhui, China.

12 **Xingrong Shen:** School of Health Service Management, Anhui Medical University,  
13 Hefei, Anhui, China.

14 **Jing Cheng:** School of Health Service Management, Anhui Medical University,  
15 Hefei, Anhui, China.

16 **Jing Chai:** School of Health Service Management, Anhui Medical University, Hefei,  
17 Anhui, China.

18 **Rui Feng:** Library Department of Literature Retrieval and Analysis, Anhui Medical  
19 University, Hefei, Anhui, China.

20 **Panpan zhang:** School of Health Service Management, Anhui Medical University,  
21 Hefei, Anhui, China.

22 **Rongyao Zhou:** School of Health Service Management, Anhui Medical University,  
23 Hefei, Anhui, China.

24 **Helen Lambert:** Department of Population Health Sciences, University of Bristol,  
25 Bristol, UK

26 **Debin Wang:** School of Health Service Management, Anhui Medical University,  
27 Hefei, Anhui, China.

28 **Word count: 3562**

## 1 Abstract

2 **Objective:** To investigate the occurrence and trajectory of reported RTI symptoms and their  
3 effects on use of self and professional care among patients in the community.

4 **Design:** A cross sectional retrospective household survey.

5 **Setting:** 12 administrative villages from rural Anhui, China.

6 **Participants:** 2160 rural adult residents aged  $\geq 18$  years registered as rural residents and  
7 actually living in the sampled villages when this study was conducted.

8 **Method:** The respondents were recruited using stratified-clustered randomized sampling. A  
9 structured questionnaire was deployed to solicit information about social demographics,  
10 symptoms of last respiratory tract infection (RTI) and healthcare-seeking following the RTI.  
11 Descriptive analyses were performed to investigate the perceived trajectory of reported  
12 symptoms and multivariate logistic regression models were developed to identify  
13 relationships between number of concurrent symptoms and healthcare-seeking and  
14 antibiotics use.

15 **Results:** A total of 1968 residents completed the survey, resulting in a response rate of  
16 91.1%. The frequencies of day on which the symptom occurred of specific symptoms all  
17 featured a steep peak followed by a long tail. The number of concurrent symptoms showed a  
18 clear increasing trend with seeking help from clinics and being prescribed antibiotics.  
19 Multivariate regression revealed statistically significant associations between: a) visiting  
20 clinics and education (OR=0.790), sore throat (OR=1.355), cough (OR=1.492), shortness of  
21 breath (OR=1.707) and fever (OR=2.142); b) buying medicine from shops without  
22 prescription and education (OR=1.230) and cough (OR=1.452); c) getting antibiotics at  
23 clinics and sore throat (OR=2.05) and earache and/or tinnitus (OR=4.884) and d) obtaining  
24 antibiotics at medicine shops and productive cough (OR=1.971).

25 **Conclusions:** Reported RTI symptoms manifest specific trajectories and play an important  
26 role in shaping both patient- and doctor-led responses. Patients' retrospective recall of the  
27 course of prior RTI episodes and their associated actions may guide future responses to  
28 similar infections. Knowledge of these trajectories may help to inform doctors about patient  
29 expectations, enabling them better to manage shared decision-making around antibiotic  
30 treatment.

### 31 Strengths and limitations of this study

- 32 ● This study demonstrates relationships between patient-reported symptoms and  
33 RTI-related healthcare-seeking.
- 34 ● The study is the first to describe detailed trajectories of common symptoms and the  
35 collective effects of concurrent symptoms as perceived by patients experiencing them.
- 36 ● The study relies on subjective retrospective perceptions or self-reports and therefore  
37 may be biased by potential under- or over-reporting and recall bias.
- 38 ● The study used a broad definition of RTIs and the occurrence and trajectory of  
39 symptoms may be distorted by seasonal and other variations when the study was  
40 conducted.

## 1 Background

2 Respiratory tract infections (RTIs) are the most common diseases in humans. Studies  
3 have demonstrated that adults usually experience 1–3 episodes of upper respiratory  
4 tract infection per year.[1,2] RTIs claim over 3 million lives annually and are the  
5 leading cause of death for children under 5 years.[3,4] Although many RTIs are mild  
6 and self-limiting, they are associated with a significant burden in terms of medical  
7 visits as well as work and school absenteeism.[5,6] The median duration of an  
8 episode of non-influenza-related viral respiratory tract infection (the most common  
9 but least serious kind of RTIs) is estimated to be 7.4 days, with 25% of cases lasting  
10 for 2 weeks.[7] In addition to the heavy burden on patients and health systems, RTIs  
11 are closely linked to antibiotic use and hence the development of antibiotic  
12 resistance. RTIs account for up to 60% of all antibiotic prescribing in UK primary  
13 care.[8,9] Excessive use of antibiotics is recognized as one of the most serious  
14 public health issues worldwide.[10]

15 According to the 10th edition of the International Classification of Diseases, RTIs  
16 comprise as many as 34 kinds of infections. However their symptoms are relatively  
17 limited, consisting mainly of sore throat, fever, cough, productive cough, rhinorrhea  
18 with or without pus, shortness of breath, headache and/or general discomfort,  
19 earache and/or tinnitus.[11,12] When faced with symptoms, patients' responses vary  
20 greatly. Some patients manage their symptoms by simply resting, drinking warm  
21 water etc. without using any medicines;[13] others buy medicines from medicine  
22 shops or pharmacies or seek professional help from doctors;[14-16] still others opt  
23 for traditional remedies.[17,18] A 2014 study of consumer attitudes on cough and  
24 cold in USA indicated that 36.1% of those surveyed reported beginning  
25 over-the-counter (OTC) treatment at the first sign of a cough or cold, 42.6% waited  
26 until cold symptoms 'get bad enough' (i.e. to cause distress) and another 20.2%  
27 waited until they had more than one symptom before beginning treatment.  
28 Altogether, 55% sought professional care eventually [19]. These varied responses  
29 have been attributed to a wide range of reasons including: features of the disease,  
30 such as severity of symptoms and their patterns of progression;[2] 'demand side'  
31 issues such as age, gender, education,[20] knowledge and attitudes about RTIs and  
32 RTI-related services,[21-25] cultural expectations and social norms;[26,27] and  
33 'supply side' factors such as perverse financial incentives, systemic pressures on  
34 healthcare providers and professional standards.[26,28,29]

35 RTIs are very common in China with an incidence rate ranging from 84.13% to  
36 120.83% in 2006.[30] This translates to 1.16 to 1.67 billion person-times of RTIs  
37 annually in the whole country. Data about service use for RTIs among China  
38 residents are scarce, but the limited research available reports huge discrepancies  
39 between different populations and very high use of antibiotics in various medical  
40 settings. An earlier study in rural primary care settings of 10 provinces in Western  
41 China found that nearly 50% of patients were prescribed antibiotics.[31] Another  
42 recent study found that antibiotics were prescribed for 78% of colds and 93.5% of

1 acute bronchitis cases.[32] According to our systemic literature review, few studies  
2 focus on factors affecting service and antibiotics use for RTIs or investigate reasons  
3 for variations in service use and antibiotic prescribing for RTIs in China. Although a  
4 number of papers on reasons for health service utilization in general did include  
5 RTIs as a subcomponent, they addressed only demand and supply side factors, with  
6 little attention being paid to the occurrence and trajectory of RTI symptoms among  
7 patients in the community and their effects on decisions about self or professional  
8 care. This study therefore aimed to investigating the occurrence and trajectory of  
9 self-reported RTI symptoms and their effects on use of self and professional care  
10 among patients in the community.

## 11 **Methods**

### 12 *Sites and population*

13 The study used across a sectional retrospective household survey design and adopted  
14 a stratified-clustered randomized sampling approach in recruiting site villages and  
15 participating residents. Selection of site villages proceeded in 4 steps. Step 1 divided  
16 all counties in Anhui province into north, middle and south regions. Step 2 randomly  
17 selected 4 counties from each of the three regions and 1 township from each of the  
18 counties selected and then 1 administrative village from each of the site townships  
19 selected above. Step 3 randomly selected 1 household from the village selected as  
20 the starting household and then recruited 180 households that were geographically  
21 closest to the starting household. Step 4 randomly selected one household member  
22 from each of these households according to preset eligibility criteria, i.e., men and  
23 women who were aged 18 years and over, were registered as rural residents and  
24 were actually living in the sampled villages when this study was conducted, and  
25 were willing and able to participate in the survey.

### 26 *Questionnaire*

27 The study used a structured questionnaire consisting of questions about four  
28 categories of variables: a) social demographics (e.g., gender, age and education); b)  
29 last episode of symptomatic RTI, including symptoms experienced and day on  
30 which each specific symptom occurred (DSO), reached its peak or became most  
31 serious (DSP) and recovery (DSR); c) responses to the RTI, including taking  
32 leftover medicines, buying any type of medicine OTC from medicine shops (here  
33 after referred to as buying medicine) and seeking treatment from clinics; d)  
34 antibiotics obtained from clinics and medicine shops. In China, a pharmacy  
35 generally refers to a department within a hospital or clinic that dispenses medicines  
36 to patients according to prescriptions by the clinicians working for the same  
37 hospital/clinic; while a medicine shop is an independent business that sells  
38 medicines to customers with or without prescriptions from clinicians. 'Seeking help  
39 from clinics' refers to visiting a local health facility staffed by a qualified health  
40 professional and is thus largely equivalent to 'seeking professional care' in western  
41 countries. Conversely, the use of antibiotics does not necessarily mean that



1 professional care was sought. Antibiotics may be purchased from medicine shops  
2 directly without prescription or kept at home for subsequent use. Almost all  
3 medicine shops in China sell both OTC and non-OTC medicines, including  
4 antibiotics. Although they may be displayed in separate cabinets, in practice  
5 non-OTC medicines may be purchased directly without prescription and customers  
6 generally do not distinguish these two types of medicines.

#### 7 *Data collection*

8 Field data collection took place from 30 April-12 May 2016 via face-to-face  
9 interviews using the structured questionnaire. Twenty-six under graduate students  
10 from Anhui Medical University performed the interviews. Measures taken to ensure  
11 data quality included: a) training and examination of the data collectors; b) daily  
12 checks by a quality control supervisor of all questionnaires completed each day; c)  
13 retest of 5% randomly selected subjects; d) feedback of errors found via daily  
14 checks and readministering of the questionnaire; e) elimination of disqualified field  
15 data collectors.

#### 16 *Data analysis*

17 Data were double-entered using EPI DATA 3.1 and SPSS 10.01 and Microsoft Excel  
18 2010 were used to analyze the data. Data analysis included: a) distribution of  
19 respondents by gender, age and education; b) percentages and accumulative  
20 percentages of patients by DSO, DSP and DSR for different RTI symptoms in total  
21 and by different demographics; c) multivariate logistic regression of  
22 healthcare-seeking and antibiotics use using social demographics and common  
23 symptoms as the independent variables; d) relationships between number of  
24 symptoms experienced by a single patient and his or her healthcare-seeking and  
25 antibiotics use. Cases with missing data were excluded from the data analyses.

#### 26 *Ethical review*

27 The study protocol was reviewed and approved by the Biomedical Ethics Committee  
28 of Anhui Medical University (reference number: 201500800) prior to the study  
29 commencing. Participation of rural residents was voluntary and written informed  
30 consent was obtained from all participants.

## 31 **Results**

### 32 **Overview of participants, symptoms and healthcare-seeking**

33 As shown in Figure 1 and Appendix 1, a total of 2160 residents were accessed and  
34 1968 completed the survey, resulting in a response rate of 91.1%. The mean age of  
35 respondents was 50.39 years (SD=13.04 years). The majority (68.0%) were females  
36 and around one third (29.6%) had no formal school education  
37 (for details, see Appendix). The high proportion of female respondents in this  
38 random sample results from the fact that in this rural area the majority of male  
39 residents have moved to cities to obtain temporary work [33]. Over 80% of reported  
40 infections had occurred within nine months prior to the survey. Dry cough (58.9%,  
41 1159), rhinorrhea without pus (51.7%, 1017) and sore throat (49.8%, 980) were the

1 most common symptoms. 55.7% of respondents reported seeking professional help  
2 from clinics, 13.4% bought medicine from medicine shops, 23.1% used leftover  
3 medicine from previous illnesses and 20.8% did nothing. Altogether, 81.3% of  
4 respondents reported having used antibiotics to treat their RTI. As shown in Table 1,  
5 Time interval between onset of infection and when the data were collected was not  
6 associated with any statistical differences between in healthcare-seeking behavior  
7 except use of leftover medicines, suggesting that recall bias had limited effects (see  
8 also Discussion and Limitations sections).

9

### 10 **Development of symptoms**

11 Figure 2 displays common symptoms reported by respondents for their most recent  
12 episode of RTI. Day of onset of specific symptoms (DSO) all feature a skewed peak;  
13 that is, they increased rapidly at the beginning, reached a sharp peak on day 1 or 2  
14 and then tailed off over 15 days. The height of symptom peaks varied across  
15 symptoms, ranging from 46.5% for shortness of breath to 56.8% for sore throat. The  
16 curves representing the most acute experience of the symptom (DSP) for specific  
17 symptoms mimic the shape of DSO in general, but are delayed (by 2-3 days) and  
18 lower (by 22.0% to 40.1%) peak. The DSR curves deviate a step further from DSO  
19 curves, with 2-3 peaks centered on days 3, 5, 10 and especially day 7. The lines  
20 depicting accumulative rates of symptom occurrence (ARSO), symptom peak  
21 (ARSP) and symptom recovery (ARSR) by different days following onset of RTIs  
22 all show an atypical “S-shape”. Accumulative rates of symptom occurrence for  
23 rhinorrhea display the fastest increase followed by sore throat, fever,  
24 headache/general discomfort, cough and shortness of breath. For the same symptom,  
25 accumulative rates of symptom peak (ARSP) are much closer to those for symptom  
26 occurrence (ARSO) than symptom recovery (ARSR). The time lag between  
27 symptom occurrence (ARSO) and recovery (ARSR) was longest for cough,  
28 followed by that of sore throat, shortness of breath, rhinorrhea headache/general  
29 discomfort and fever.

30  
31 Figure 3 shows the distribution of DSO, DSP and DSR of three selected symptoms  
32 (dry cough, rhinorrhea without pus, sore throat) by gender (more information about  
33 symptom trajectories by different subgroups is given in Appendices 2 to 4).  
34 Statistical differences in these distributions between different social demographic  
35 groupings are apparent only for the symptoms rhinorrhea without pus, headache and  
36 soreness, and shortness of breath. Respondents with over 10 years of education  
37 tended to report earlier occurrence of headache and soreness, and shortness of breath  
38 but later occurrence of rhinorrhea; while those aged over 60 years were more likely  
39 to report earlier occurrence of rhinorrhea.

40

### 1 **Individual symptoms and treatment-seeking**

2 Table 2 displays logistic regression modeling of service use individual symptoms  
3 and socio-demographic characteristics. Education was negatively associated with  
4 seeking help from clinics (OR=0.790[0.697-0.896]), but positively related with  
5 buying medicine (OR=1.230[1.068-1.417]) and using leftover medicine  
6 (OR=1.283[1.073-1.535]); Females were more likely to use leftover medicine than  
7 males (OR=2.016[1.411-2.881]), while age had no effects on any treatment-seeking  
8 behavior. When controlled for social demographic characteristics, buying medicine  
9 was positively related with cough (OR=1.452[1.124-1.875]); taking leftover  
10 medicine, with headache and soreness (OR=1.581[1.169-2.138]); and seeking help  
11 from clinics, with sore throat (OR=1.355[1.109-1.654]), cough  
12 (OR=1.492[1.198-1.859]), shortness of breath (OR=1.707[1.287-2.265]) and fever  
13 (OR=2.142[1.654-2.775]). Being prescribed antibiotics at clinics was related  
14 positively only to with earache and/or tinnitus (OR=4.884[1.162-20.522]), while  
15 purchasing antibiotics OTC from medicine shops was positively linked with  
16 productive cough (OR=1.971[1.125-3.453]). Rhinorrhea with or without pus are not  
17 associated with any specific treatment-seeking behavior.

18  
19 As shown in Figure 4, over 60.5% of healthcare-seeking happened between two  
20 days before and one day after symptoms peaked. Less than 7% of healthcare-seeking  
21 occurred two or more days after symptoms had peaked. The timing of  
22 healthcare-seeking showed varied extent of clustering on different symptom peaks,  
23 being most narrowly centered for Fever followed by Headache/General discomfort  
24 and Rhinorrhea without pus.

### 26 **Concurrent symptoms and service use**

27 Figure 5 and Appendices 5-6 display the relationships between service-seeking and  
28 number of concurrent symptoms in total and by demographic characteristics. Overall,  
29 seeking help from clinics and getting antibiotics at clinics show a clear increasing  
30 trend with number of symptoms. Only 37.5% of respondents who had experienced  
31 one symptom had sought help from a clinic, while 75.0% those who had  
32 experienced over seven symptoms had done so. Similarly, the use of antibiotics at  
33 clinics increased from 77.7% for patients with one symptom to 96.4% for those with  
34 over seven symptoms. However buying medicine from shops, taking leftover  
35 medicine and getting antibiotics from shops showed no statistically significant trend  
36 as the number of symptoms increased. The relationships between number of  
37 symptoms and service-seeking were consistent across all gender, age and education  
38 subgroups. This inter-subgroup consistency was also observed in the null trend of  
39 getting antibiotics at clinics or at medicine shops by patients with increasing number  
40 of symptoms.

## Discussion

This study has uncovered useful data for better understanding the experience of RTIs among patients in the community and their relations with healthcare seeking and antibiotics use. Since the respondents' reports of RTI symptoms are retrospective and relate to experiences of illness and its treatment occurring up to nine months previously, our data provide insights into their perceptions of symptom trajectories rather than actual trajectories. However, self-reported disease courses are of equal (if not greater) significance than actual ones in terms of healthcare-seeking. When faced with an RTI, a patient's experiences and recollections of previous similar symptoms may affect his/her prediction of the current infection and thus inform decisions about whether or what type of healthcare to use; while perceptions leading to inappropriate treatment imply education and counseling needs.

Knowledge of patients' perceptions of RTI symptom trajectories is valuable for both clinicians and patients, as they set expectations and facilitate recognition of when an illness is deviating from the expected course [34]. Commonly used estimates of the expected time course of RTI symptoms are highly variable and not always evidence-based but reflect expert opinion. [35] Although a number of studies have documented onset and duration of cough, earache etc. in terms of median days or days of inter quartile range,[19, 36-38] the current study is the first to portray the course of common RTI symptoms as experienced and reported by patients, using frequency curves by days following onset. Our interpretation of the featured curves (a sharp increase and peak followed by a long tail) is that they reflect the joint effects of not only the pathology of RTIs, but also health service use and psycho-social factors, as well as memory/self-report biases. Comparison of such curves for different symptoms and from different populations may yield new insights. Our study found that multiple peaks occurred only in the curves of symptom recovery days and that different symptom peaked after different days rather than together. While the length of time between RTI episode and data collection could lead to 'wild guessing' the peaks on day 7 and 10 are more likely to be attributable to 'rough reporting', since in China people customarily plan activities and measure time periods in terms of 'Zhou (a week)' or 'Xun (ten days)'.

Interestingly, our symptom trajectories did not show statistically significant differences between socio-demographic characteristics except for education and age. Education-based differences in symptom reporting may be attributable to those with more education being more conscious of their health; [22,23,39] and by them having greater likelihood, due to better health and environment conditions, of avoiding some of the less virulent RTIs. Similar differences in susceptibility to RTIs may also apply to the observed difference between those under versus over 60 years.

The study showed selective associations between service use and socio-demographic

1 characteristics. Education was negatively related to seeking help from clinics but  
2 positively associated with taking leftover medicine and buying medicine from shops;  
3 while females are more likely than males to take leftover medicine. However,  
4 specifically using antibiotics obtained from clinics and medicine shops did not show  
5 any statistically significant socio-demographic differences. These findings may  
6 suggest that decisions on whether or not to visit a clinic, take leftover medicine or  
7 buy medicine from a shop is made by patients themselves and is thus amenable to  
8 the influence of patients' socio-demographic characteristics; while the decision on  
9 whether or not to provide antibiotics to patients is determined mainly by the doctors  
10 at clinics or staff at medicine shops and thus is not affected by these characteristics.

11  
12 The study documented strong and consistent relations between symptoms and  
13 service-seeking. As the number of concurrent symptoms increased from 1 to 7 or  
14 more, the proportion of patients who had sought help from clinics increased from  
15 37.5% to 75.0% and the proportion of service seekers who had been prescribed  
16 antibiotics increased from 77.7% to 96.4%. These findings suggest that clustering of  
17 symptoms affect both patient- and doctor-led behavior and thus merit particular  
18 attention in future interventions. Interestingly, the difference in the percentage of  
19 service-seeking for patients with 1 symptom (37.5%) versus that for those with 7+  
20 symptoms (75.0%) is substantially greater than that of antibiotics prescribing (77.7%  
21 versus 96.4%). One possible explanation for this difference is that patients directly  
22 suffer from symptoms while professionals are only told about them by their patients,  
23 so patient-led behaviors (i.e. health service-seeking) may be more sensitive to  
24 symptoms than professional-led ones (i.e. antibiotics prescribing). [40,41] In  
25 addition, as lay persons, patients may not be as capable as doctors of distinguishing  
26 important from non-important symptoms, and so numbers of symptoms have closer  
27 links with perceptions of acute or serious illness among patients than among health  
28 professionals. As for the lack of correlation between number of symptoms and  
29 purchase of medicines from shops, this may reflect the combined effects of two  
30 drivers. On the one hand, more symptoms serve as a greater driver for patients to  
31 seek professional help from clinics as well as medicine shops. On the other, seeking  
32 help from clinics and shops are competitive behaviors and as patients experience  
33 more symptoms they are more likely to visit clinics than shops.

34  
35 Positive relationships were found between a number of specific symptoms and  
36 service-seeking. Seeking help from clinics was linked to, in order of magnitude of  
37 logistic regression coefficient, fever ( $B=0.76$ ), shortness of breath ( $B=0.54$ ), cough  
38 ( $B=0.40$ ) and soreness ( $B=0.30$ ). These coefficients and their rank order reveal  
39 useful information about the perceived importance, suffering and urgency of each of  
40 the corresponding symptoms for patients. Compared with seeking help from clinics,  
41 the driving symptoms for buying medicine from shops may be milder in nature and  
42 fewer in number, with only 1 symptom, dry cough, being positively associated with



1 the latter behavior. This indicates that patients with equal access to the two kinds of  
2 help tend to choose clinics rather than shops if they have more and severer  
3 symptoms and vice versa. In addition, being given antibiotics at clinics was linked  
4 with earache and/or tinnitus and at medicine shops, with productive cough. These  
5 findings are consistent with published evidence.[42]  
6

### 7 **Study Limitations**

8 The study has a number of limitations. First, prior care may have affected the  
9 symptom trajectories reported in this paper. Given that over 80% of patients had  
10 used antibiotics, the curves of RTI symptoms derived in this study may differ  
11 from 'natural' trajectories without any treatment and in western communities where  
12 antibiotics use is much lower. Unfortunately, we were unable to find similar  
13 trajectory data from western populations. However, although antibiotic use is much  
14 higher in China than in US, data about RTI duration from our populations seem to be  
15 close to that from US. [19,43]. This suggests that the effect of antibiotics on RTI  
16 trajectory in the community may not be particularly important, since the majority  
17 of RTIs are caused by viruses rather than bacteria.

18  
19 Secondly, the study relied on subjective perceptions and self-reports. Individuals are  
20 poor at accurately reporting certain health behaviors and feelings and inherent  
21 tendencies to respond in ways that make them appear healthier or otherwise conform  
22 to social norms may introduce bias. However, these characteristics are typically  
23 apparent across the board, reducing the effects of this threat to internal validity.  
24 More importantly, the long recall period between last experienced episode and  
25 survey data collection is likely to have led to recall bias; milder RTIs in particular,  
26 exact patterns of symptom experience and details of associated treatment-seeking  
27 behavior may have been forgotten. Our findings do suggest some extent of  
28 recall/memory bias, but Table 1 shows that there was no statistical relationship  
29 between time interval from onset of infection and data collection for any  
30 healthcare-seeking behavior except for use of leftover medicines, which was  
31 reported as 9.6% among patients with a time interval of over 9 months compared  
32 with 16.2% among patients with a less than 3 months time interval. Moreover, as  
33 described in the discussion, our analysis treats these data as proxy evidence of  
34 patients' typical perceptions of the course of infection rather than of the actual  
35 course of infection.

36  
37 Third, given the broad symptom-based definition of RTIs used in the study, seasonal  
38 and other influences on symptom occurrence may have affected the frequency and  
39 trajectory of symptoms. Fourth, the overrepresentation of females may raise  
40 concerns about selection biases. However, our analysis revealed no significant  
41 differences by gender in terms of symptom-related treatment-seeking except for

1 taking leftover medicines, which was more commonly reported by females.

### 2 3 **Abbreviations**

4 **RTI(S)** respiratory tract infection(s)

5 **DSO** day on which specific symptom occurred

6 **DSP** day on which symptom reached its peak or became most serious

7 **DSR** day on which symptom recovery

8 **ARSO** Accumulative rate of symptom occurrence

9 **ARSP** Accumulative rate of symptom peak

10 **ARSR** Accumulative rate of symptom recovery

### 11 12 **Contributors**

13 Mengjie Diao participated in data collection and drafted the manuscript. Xingrong  
14 Shen and Rui Feng designed the instruments and performed data analysis. Jing  
15 Cheng and Jing Chai implemented field data collection, trained data collectors and  
16 controlled data quality. Rongyao Zhou and Panpan Zhang implemented the data  
17 collection. Debin Wang and Helen Lambert provided expertise for overall design of  
18 the study and revised and finalized the manuscript. All authors approved the final  
19 version to be published and agree to be accountable for all aspects of the work in  
20 ensuring that questions related to the accuracy or integrity of any part of the work  
21 are appropriately investigated and resolved.

22  
23 **Funding** This study was supported partly by China-UK Prosperity Found (Grant  
24 number PPYCHN1590/15SS19) and partly by the National Nature Science  
25 Foundation of China (Grant number 81661138001 and 71704003).

26 **Declaration of Conflicting Interests** The authors declare no potential conflicts of  
27 interest with respect to the research, authors and/or publication of this article.

28 **Data sharing statement** Anonymised participant data used in the preparation of this  
29 article will be made available on request from the lead author.

### 30 **References**

- 31 1. Leder K, Sinclair M I, Mitakakis T Z, et al. A community-based study of respiratory episodes  
32 in Melbourne, Australia[J]. Aust N Z J Public Health.2003;27(4): 399–404.DOI:  
33 10.1111/j.1467-842X.2003.tb00416.x [PubMed:14705301]
- 34 2. Hull J D, Barton I P, Torgersen J, et al. A Survey of the Experience and Impact of Acute Upper  
35 Respiratory Tract Infections on People in Six Countries in the 2011/2012 Common Cold and  
36 Flu Season[J]. Open Journal of Respiratory Diseases, 2013,03(4):175-187.DOI:  
37 10.4236/ojrd.2013.34026
- 38 3. Collaborators M C O D. Global, regional, and national age-sex specific all-cause and  
39 cause-specific mortality for 240 causes of death, 1990-2013: a systematic analysis for the  
40 Global Burden of Disease Study 2013.[J]. Lancet, 2015, 385(9963):117-171.DOI:

- 10.1016/S0140-6736(14)61682-2. [PubMed: 25530442]
4. More than 1.2 million adolescents die every year, nearly all preventable.<http://www.who.int/mediacentre/news/releases/2017/yearly-adolescent-deaths/en/> (accessed 5 Jul 2017).
5. Adam PF, Hendershot GE, Marano MA. Current estimates from the National Health Interview Survey [J]. *Vital Health Stat*, 1999, 10(6):59-66. [PubMed:15782448]
6. Oppong R, Coast J, Hood K, et al. Resource use and costs of treating acute cough/lower respiratory tract infections in 13 European countries: results and challenges[J]. *European Journal of Health Economics*, 2011, 12(4):319-329. DOI: 10.1007/s10198-010-0239-1. [PubMed:20364288]
7. Thompson M, Vodicka T A, Blair P S, et al. Duration of symptoms of respiratory tract infections in children: systematic review[J]. *Bmj British Medical Journal*, 2013, 347(dec11 1):f7027.DOI: 1136/bmj.f7027 [PubMed: 24335668]
8. Petersen I, Hayward A C. Antibacterial prescribing in primary care[J]. *Journal of Antimicrobial Chemotherapy*, 2007, 60 Suppl 1(Supplement 1):i43.DOI:10.1093/jac/dkm156[PubMed: 17656380]
9. Gulliford M C, Dregan A, Moore M V, et al. Continued high rates of antibiotic prescribing to adults with respiratory tract infection: survey of 568 UK general practices[J]. *Bmj Open*, 2014, 4(10):e006245.DOI: 10.1136/bmjopen-2014-006245.[PubMed:PMC4212213]
10. Costelloe C, Metcalfe C, Lovering A, et al. Effect of antibiotic prescribing in primary care on antimicrobial resistance in individual patients: systematic review and meta-analysis[J]. *Bmj*, 2010, 340(7756):1120-1120.DOI: 10.1136/bmj.c2096.[PubMed: 20483949]
11. Lu Y, Tong J, Pei F, et al. Viral aetiology in adults with acute upper respiratory tract infection in Jinan, Northern China.[J]. *Clinical & Developmental Immunology*, 2013, 2013(2): 869521-869521. DOI: 10.1155/2013/869521.[PubMed:PMC3649347 ]
12. Kochen M M, Susanne F, Thomas F, et al. Influence of patient symptoms and physical findings on general practitioners' treatment of respiratory tract infections: a direct observation study[J]. *Bmc Family Practice*, 2005, 6(1):1-7.DOI:10.1186/1471-2296-6-6 [PubMed:PMC550651 ]
13. Halvorsen P A, Godycki-Cwirko M, Wennevold K, et al. Would GPs advise patients with respiratory tract infections to refrain from exercise, stay indoors or stay in bed? Survey of GPs in Poland and Norway[J]. *European Journal of General Practice*, 2013, 20(3):209-213.DOI: 10.3109/13814788.2013.848339.[PubMed: 24219344 ]
14. Ahmad A, Patel I, Mohanta G P, et al. Evaluation of Self Medication Practices in Rural Area of Town Sahaswan at Northern India[J]. *Annals of medical and health sciences research*, 2014, 4(2):73-8.DOI: 10.4103/2141-9248.138012.[PubMed: PMC4145522 ]
15. Courtenay M, Rowbotham S, Lim R, et al. Antibiotics for acute respiratory tract infections: a mixed-methods study of patient experiences of non-medical prescriber management[J]. *Bmj Open*, 2017, 7(3):e013515.DOI: 10.1136/bmjopen-2016-013515.[PubMed: PMC5353344]
16. Essack S, Pignatari A C. A framework for the non-antibiotic management of upper respiratory tract infections: towards a global change in antibiotic resistance.[J]. *International Journal of Clinical Practice*, 2013, 67(Supplement s180):4-9.DOI:10.1111/ijcp.12335. [PubMed: 24238424]



17. Wang X, Liu Z. Prevention and treatment of viral respiratory infections by traditional Chinese herbs[J]. Chinese medical journal, 2014, 127(7):1344-1350.DOI: 10.3760/cma.j.issn.0366-6999.20132029 [Pubmed: 24709192]
18. Wun Y T, Tai P L, Lam K F, et al. Comparison of the knowledge, attitudes and practice with antibiotic use between traditional Chinese medicine and western medicine usual attenders in Hong Kong[J]. Complementary Therapies in Medicine, 2014, 22(1):99-106.DOI: 10.1016/j.ctim.2013.11.004.[Pubmed: 24559824]
19. Blaiss M, Dicpinigaitis P, Eccles R, et al. Consumer Attitudes on Cough and Cold: US (ACHOO) Survey Results.[J]. Current Medical Research & Opinion, 2015(8):1527-1538.DOI: 10.1185/03007995.2014.1002558.[Pubmed: 25535904]
20. Birk H O, Gut R, Henriksen L O. Patients' experience of choosing an outpatient clinic in one county in Denmark: results of a patient survey[J]. BMC Health Serv Res., 2011, 11(1):262.DOI: 10.1186/1472-6963-11-262.[Pubmed: PMC3205034]
22. Kaae S, Malaj A, Hoxha I. Antibiotic knowledge, attitudes and behaviours of Albanian health care professionals and patients – a qualitative interview study[J]. J Pharm Policy Pract. , 2017, 10(1):13.DOI: 10.1186/s40545-017-0102-1. [Pubmed: PMC5379499]
23. Hawking M K, Lecky D M, Lundgren P T, et al. Attitudes and behaviours of adolescents towards antibiotics and self-care for respiratory tract infections: a qualitative study[J]. Bmj Open, 2017, 7(5):e015308.DOI: 1136/bmjopen-2016-015308. [Pubmed: 28592579]
24. Rebnord I K, Sandvik H, Mjelle A B, et al. Factors predicting antibiotic prescription and referral to hospital for children with respiratory symptoms: secondary analysis of a randomised controlled study at out-of-hours services in primary care[J]. Bmj Open, 2017, 7(1):e012992.
25. Rebnord I K, Sandvik H, Mjelle A B, et al. Out-of-hours antibiotic prescription after screening with C reactive protein: a randomised controlled study[J]. Bmj Open, 2016, 6(5):e011231.
26. Hopkins S. Cultural and Socioeconomic Determinants of Antibiotic Use[M]// Antibiotic Policies: Fighting Resistance. Springer US, 2008:29-40.
27. Gach O, Troisfontaines P, Legrand V. Identification of cultural determinants of antibiotic use cited in primary care in Europe: a mixed research synthesis study of integrated design “Culture is all around us”[J]. BMC Public Health, 2015, 15(1):1-9.DOI:10.1186/s12889-015-2254-8. [Pubmed: PMC4574721]
28. Reynolds L, Mckee M. Factors influencing antibiotic prescribing in China: An exploratory analysis[J]. Health Policy, 2009, 90(1):32.DOI: 10.1016/j.healthpol.2008.09. 002. [Pubmed: 18849089]
29. Cho HJ, Hong SJ, Park S. Knowledge and beliefs of primary care physicians, pharmacists, and parents on antibiotic use for the pediatric common cold. Soc Sci Med 2004; 58:623–9.DOI:org/10.1016/S0277-9536(03)00231-4 [Pubmed:14652058]
30. Ning R G, Min K, Zhen H Z. Analysis of the incidence and treatment of common cold in Guangzhou residents in 2006[J]. Southern China preventive medicine, 2008, 34(4): 46-48.DOI: 1671 -5039( 2008) 04 -0046 -03
31. Dong L, Yan H, Wang D. Antibiotic prescribing patterns in village health clinics across 10

- 1 provinces of Western China[J]. *Antimicrob Chemother* 2008;62:410–5.DOI: 10.1093/  
2 jac/dkn153. [PubMed:18400805]
- 3 32. Wang J, Wang P, Wang X et al. Use and prescription of antibiotics in primary health care  
4 settings in China. *JAMA Intern Med*2014;174:1914–20.DOI: 10.1001/jamainternmed.  
5 2014.5214. [PubMed:25285394]
- 6 33. Chai J, Chen P, Feng R, et al. Life events and chronic physical conditions among left-behind  
7 farmers in rural China a cross-sectional study[J]. *Bmc Public Health*, 2015, 15(1):594.
- 8 334. Ebell M H, Lundgren J, Youngpairoj S. How long does a cough last? Comparing patients'  
9 expectations with data from a systematic review of the literature.[J]. *Annals of Family  
10 Medicine*, 2013, 11(1):5-13.DOI: 0.1370/afm.1430. [PubMed:PMC3596033]
- 11 35. Fashner J, Ericson K, Werner S. Treatment of the common cold in children and adults[J].  
12 *American Family Physician*, 2012, 86(2):153. [PubMed:22962927]
- 13 36. Arroll B, Kenealy T. Common cold.[J]. *Clin Evid*, 2008, 2008(12):1390-1391.
- 14 37. Morris P S. Upper respiratory tract infections (including otitis media)[J]. *Pediatric Clinics of  
15 North America*, 2009, 56(1):101-117.DOI:10.1016/j.pcl.2008.10.009. [PubMed: 19135583]
- 16 38. Tim K. Sore throat[J]. *American Family Physician*, 2015, 91(10):689-90.
- 17 39. Solberg L I, Braun B L, Fowles J B, et al. Care-seeking behavior for upper respiratory  
18 infections[J]. *Journal of Family Practice*, 2000, 49(10):915. [PubMed: 19135583]
- 19 40. Tan Y S, Hong C Y, Chong P N, et al. Knowledge that upper respiratory tract infection  
20 resolves on its own is associated with more appropriate health-seeking behavior and  
21 antibiotic cognition.[J]. *Singapore Medical Journal*, 2006, 47(6):518.DOI: 10.1016/  
22 j.socscimed.2015.05.027. [PubMed: 16752021]
- 23 41. Grigoryan L, Burgerhof J G M, Haaijerruskamp F M, et al. Is self-medication with  
24 antibiotics in Europe driven by prescribed use?[J]. *Journal of Antimicrobial Chemotherapy*,  
25 2007, 59(1):152-6.DOI:10.1093/jac/dk1457 [PubMed: 17124192]
- 26 42. Chang A B, Oppenheimer J J, Weinberger M, et al. Children With Chronic Wet or Productive  
27 Cough—Treatment and Investigations:A Systematic Review[J]. *Chest*, 2016, 149(1):120-142.  
28 DOI: 10.1378/chest.15-2065. [PubMed: 26757284]
- 29 43. Upper respiratory tract infection. Science popularization project of State Health Planning  
30 Commission. <http://www.baikemy.com/disease/detail/1088/1> [Last accessed 15 November  
31 2017 ]

33 Figure 1 Flow chart describing symptoms, healthcare-seeking and antibiotics use among study  
34 population

35 Figure2 Trajectory of common symptoms experienced in the last time RTIs

36 Figure 3 Symptom occurrence, peak and recovery by gender and days following onset of  
37 infection

38 Table1 Service use by time interval in between onset of infection and data collection

1  
2  
3  
4  
5  
6  
7  
8  
9  
10  
11  
12  
13  
14  
15  
16  
17  
18  
19  
20  
21  
22  
23  
24  
25  
26  
27  
28  
29  
30  
31  
32  
33  
34  
35  
36  
37  
38  
39  
40  
41  
42  
43  
44  
45  
46  
47  
48  
49  
50  
51  
52  
53  
54  
55  
56  
57  
58  
59  
60

- 1 Table2 Multivariate logistic regression models between service-seeking and specific symptoms
- 2 Figure 4 distribution of healthcare-seeking by time difference between day on which patient
- 3 sought healthcare and day on which symptom peaked
- 4 Figure 5 Service-seeking by number of symptoms in total and by genders

For peer review only

Table 1 Service use by time interval between onset of infection and data collection

| Time interval<br>(Days) | Total      | Buying medicine from<br>medicine shops | Taking leftover medicine | Seeking help from clinics | Getting antibiotics at<br>clinics | Getting antibiotics at<br>medicine shops |
|-------------------------|------------|----------------------------------------|--------------------------|---------------------------|-----------------------------------|------------------------------------------|
| ≤90                     | 844(44.6%) | 196(23.3%)                             | 136(16.2%)               | 475(56.3%)                | 315(86.1%)                        | 144(77.4%)                               |
| 91-180                  | 494(26.1%) | 107(21.8%)                             | 60(12.2%)                | 276(55.9%)                | 177(85.9%)                        | 67(67.0%)                                |
| 181-270                 | 192(10.2%) | 51(26.6%)                              | 18(9.4%)                 | 110(57.3%)                | 72(85.7%)                         | 38(80.9%)                                |
| ≥271                    | 361(19.1%) | 80(22.2%)                              | 34(9.6%)                 | 198(54.8%)                | 116(84.7%)                        | 59(78.7%)                                |
| $\chi^2$                |            | 1.907                                  | 13.438                   | 0.355                     | 0.165                             | 5.409                                    |
| <i>P</i>                |            | 0.592                                  | <b>0.004</b>             | 0.949                     | 0.983                             | 0.144                                    |

Table 2 Multivariate logistic regression models between service-seeking and specific symptoms

|                             | buying medicine from shops (n1=1484,n2=445) |                    | taking leftover medicine (n1=1668, n2=257) |                    | Seeking help from clinics (n1=857,n2=1078) |                    | Getting antibiotics at clinics (n1=117, n2=692) |                     | Getting antibiotics at shops (n1=103, n2=313) |                    |
|-----------------------------|---------------------------------------------|--------------------|--------------------------------------------|--------------------|--------------------------------------------|--------------------|-------------------------------------------------|---------------------|-----------------------------------------------|--------------------|
|                             | OR                                          | 95%CI              | OR                                         | 95%CI              | OR                                         | 95%CI              | OR                                              | 95%CI               | OR                                            | 95%CI              |
| Gender                      | 1.085                                       | 0.840-1.400        | <b>2.016</b>                               | <b>1.411-2.881</b> | 0.819                                      | 0.653-1.027        | 0.952                                           | 0.592-1.532         | 0.863                                         | 0.497-1.498        |
| Age                         | 0.984                                       | 0.873-1.109        | 0.866                                      | 0.742-1.011        | 1.104                                      | 0.993-1.227        | 0.887                                           | 0.704-1.118         | 1.022                                         | 0.789-1.324        |
| Education                   | <b>1.23</b>                                 | <b>1.068-1.417</b> | <b>1.283</b>                               | <b>1.073-1.535</b> | <b>0.79</b>                                | <b>0.697-0.896</b> | 0.849                                           | 0.646-1.114         | 1.133                                         | 0.842-1.523        |
| Sore throat                 | 1.016                                       | 0.810-1.275        | 1.303                                      | 0.971-1.748        | <b>1.355</b>                               | <b>1.109-1.654</b> | <b>2.05</b>                                     | <b>1.337-3.143</b>  | 1.604                                         | 0.990-2.599        |
| Rhinorrhea without pus      | 0.838                                       | 0.669-1.051        | 1.057                                      | 0.791-1.411        | 1.045                                      | 0.856-1.276        | 1.25                                            | 0.816-1.915         | 0.792                                         | 0.486-1.290        |
| Rhinorrhea with pus         | 0.96                                        | 0.714-1.292        | 0.78                                       | 0.531-1.145        | 1.045                                      | 0.804-1.359        | 1.013                                           | 0.566-1.813         | 1.796                                         | 0.869-3.711        |
| Dry cough                   | <b>1.452</b>                                | <b>1.124-1.875</b> | 0.809                                      | 0.587-1.114        | <b>1.492</b>                               | <b>1.198-1.859</b> | 1.318                                           | 0.812-2.140         | 1.328                                         | 0.777-2.269        |
| Productive cough            | 1.026                                       | 0.798-1.318        | 1.28                                       | 0.926-1.770        | 1.115                                      | 0.891-1.395        | 0.907                                           | 0.561-1.466         | <b>1.971</b>                                  | <b>1.125-3.453</b> |
| Shortness of breath,        | 0.782                                       | 0.571-1.071        | 0.695                                      | 0.458-1.054        | <b>1.707</b>                               | <b>1.287-2.265</b> | 0.927                                           | 0.533-1.613         | 1.049                                         | 0.488-2.255        |
| Earache/tinnitus            | 1.421                                       | 0.979-2.063        | 1.305                                      | 0.825-2.063        | 0.757                                      | 0.535-1.072        | <b>4.884</b>                                    | <b>1.162-20.522</b> | 1.489                                         | 0.608-3.648        |
| Headache general discomfort | 1.102                                       | 0.875-1.389        | 1.581                                      | 1.169-2.138        | 1.178                                      | 0.962-1.443        | 1.184                                           | 0.765-1.831         | 1.026                                         | 0.623-1.690        |
| Fever                       | 0.778                                       | 0.583-1.037        | 1.223                                      | 0.866-1.725        | <b>2.142</b>                               | <b>1.654-2.775</b> | 1.33                                            | 0.791-2.236         | 1.74                                          | 0.833-3.633        |

Note: n1 and n2 stands for the number of no and yes response respectively to each service use behavior; for each service use behavior, no (n1) was coded as 0 and yes(n2), as 1. Gender: 1=male,2=female; Age group: 1= ≤40y, 2=41-50y, 3=51-60y,4= ≥61y; Educatio: 1=0 years,2=1-6 years ,3=7-9 years ,4=≥10 years. Symptoms: no= 0 and yes= 1; Medicines comprise all kinds of drugs used for treating illnesses and antibiotics are one kind of medicines.

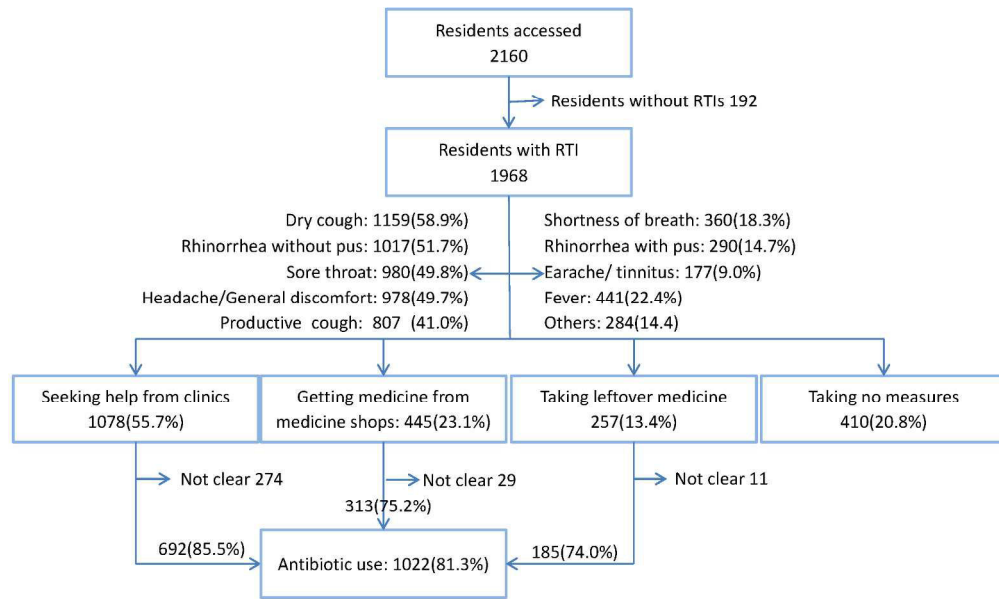

Figure 1 Flow chart describing symptoms, healthcare-seeking and antibiotics use among study population

224x136mm (300 x 300 DPI)

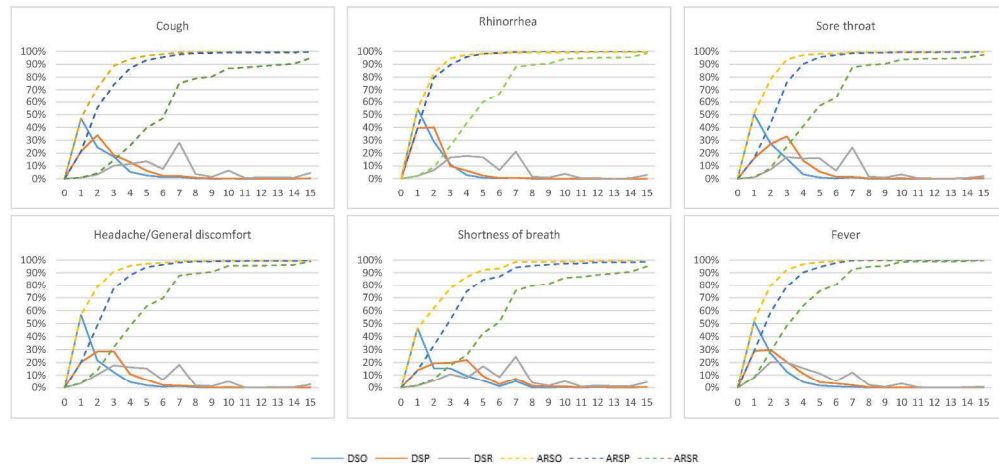

Figure 2 Trajectory of common symptoms experienced in the last time RTIs  
 Note: DSO, day on which symptom occurred; DSP, day on which symptom reached its peak or became most serious; DSR, day on which symptom remitted; ARSO, Accumulative rate of symptom occurrence; ARSP, Accumulative rate of symptom peak; ARSR, Accumulative rate of symptom remitted.

248x116mm (300 x 300 DPI)

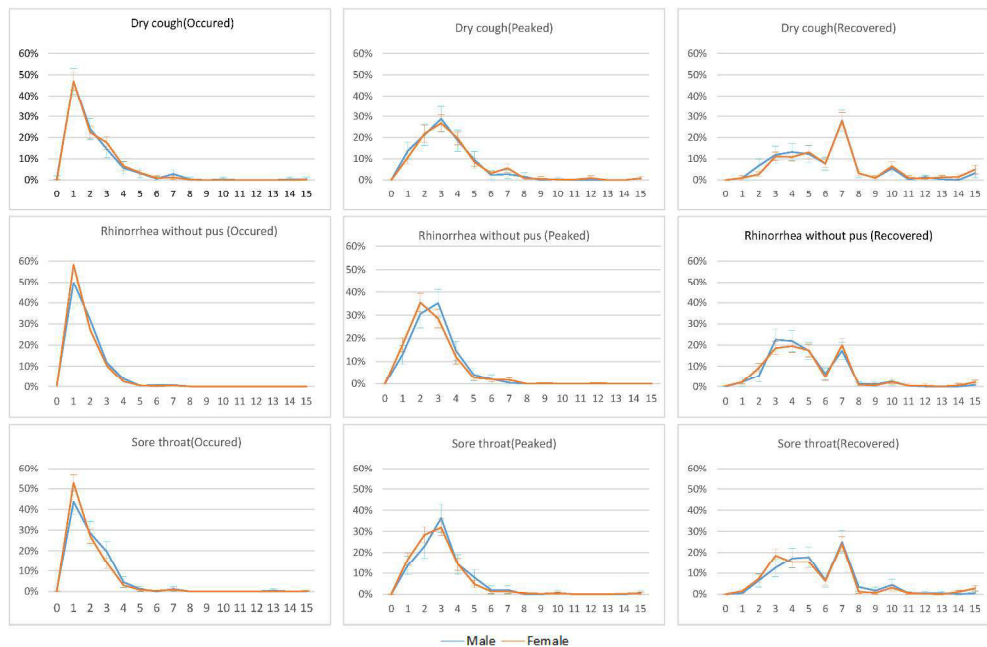

Figure 3 Symptom occurrence, peak and recovery by gender and days following onset of infection

249x161mm (300 x 300 DPI)



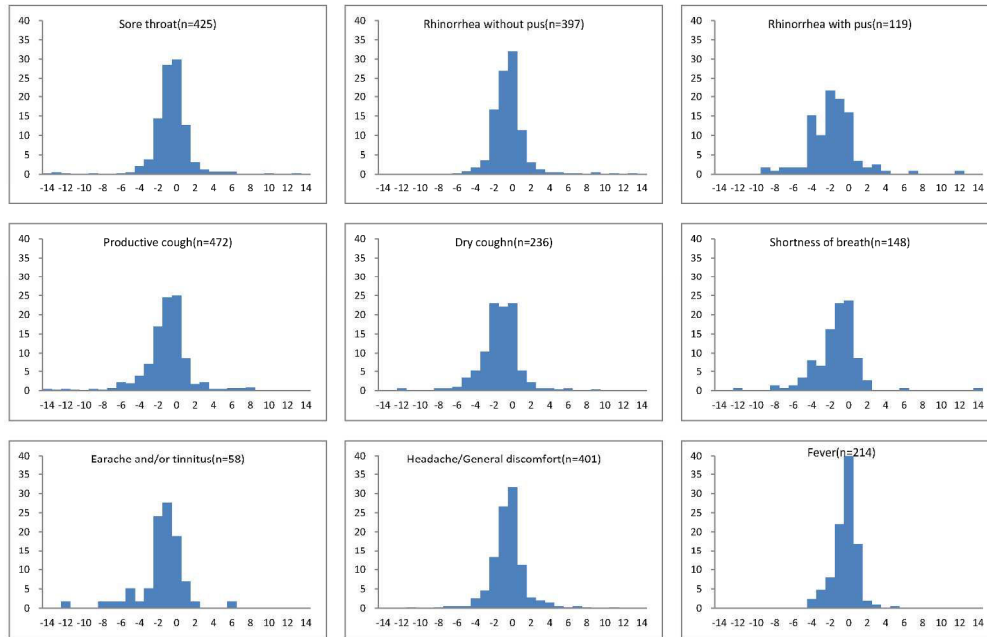

Figure 4 distribution of healthcare-seeking by time difference between day on which patient sought healthcare and day on which symptom peaked

Note: the numbers along "Y" axis stand for percentages of healthcare-seeking happened on a given day. The negative numbers along the "X" axis stand for days of healthcare-seeking before the day symptom peaked; while the positive numbers along the "X" axis, days of healthcare-seeking after the day symptom peaked.

252x163mm (300 x 300 DPI)

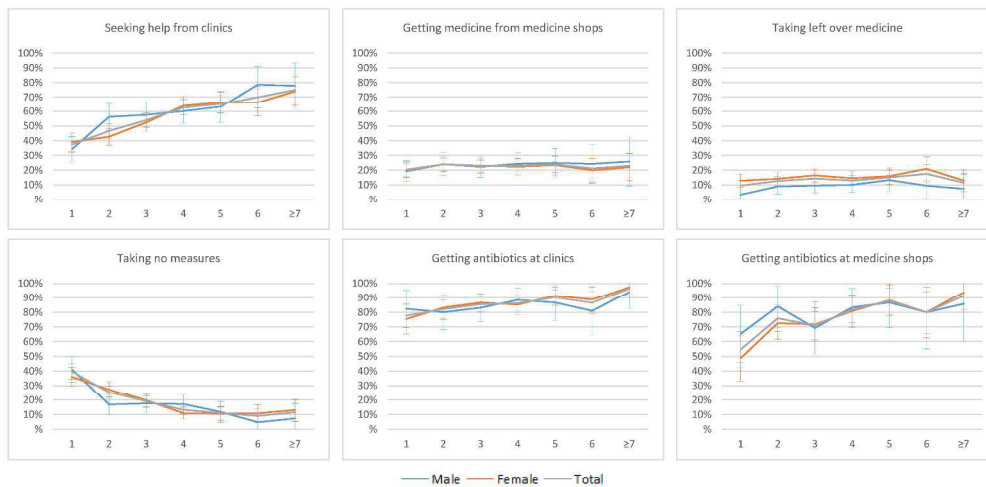

Figure 5 Healthcare-seeking by number of symptoms in total and by genders  
 Note: The numbers along the horizontal axis stand for numbers of symptoms; medicines comprise all kinds of drugs used for treating illnesses and antibiotics are one kind of medicines

249x121mm (300 x 300 DPI)

Appendix 1 Characteristics of 1968 adults with respiratory tract infection

|           | Male      | Female    | Total     |
|-----------|-----------|-----------|-----------|
| Age       |           |           |           |
| 18-40y    | 128(20.3) | 317(23.7) | 445(22.6) |
| 41-50y    | 152(24.1) | 360(26.9) | 512(26.0) |
| 51-60y    | 134(21.3) | 323(24.1) | 457(23.3) |
| ≥61y      | 216(34.3) | 338(25.3) | 554(28.2) |
| Education |           |           |           |
| 0y        | 95(15.1)  | 487(36.4) | 582(29.6) |
| 1-6y      | 195(31.0) | 390(29.1) | 585(29.7) |
| 7-9y      | 269(42.7) | 360(26.9) | 629(32.0) |
| ≥10y      | 71(11.3)  | 101(7.5)  | 172(8.7)  |
| Total     | 630       | 1338      | 1968      |

242x75mm (300 x 300 DPI)

peer review only

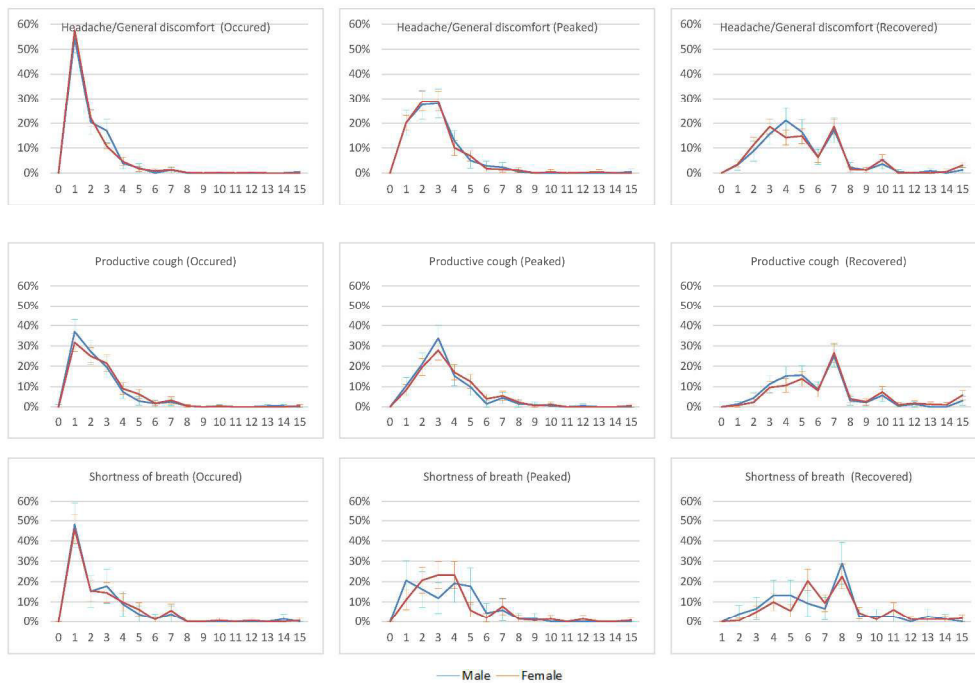

Appendix 2-1 Symptom occurrence, peak and recovery by gender and days following onset of infection

254x183mm (300 x 300 DPI)

ew only

1  
2  
3  
4  
5  
6  
7  
8  
9  
10  
11  
12  
13  
14  
15  
16  
17  
18  
19  
20  
21  
22  
23  
24  
25  
26  
27  
28  
29  
30  
31  
32  
33  
34  
35  
36  
37  
38  
39  
40  
41  
42  
43  
44  
45  
46  
47  
48  
49  
50  
51  
52  
53  
54  
55  
56  
57  
58  
59  
60

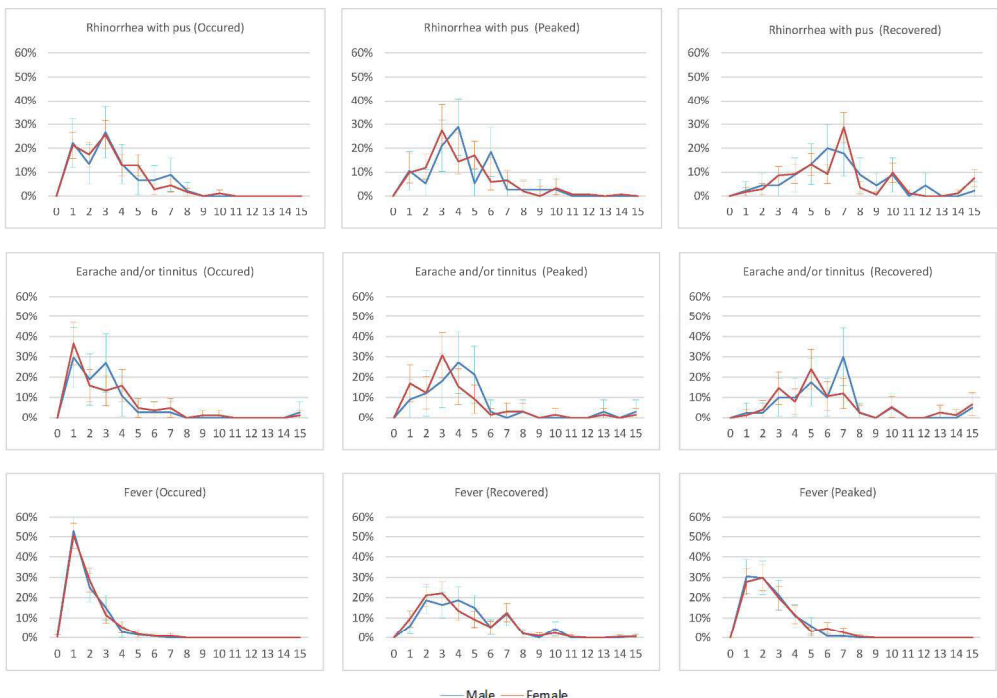

Appendix 2-2 Symptom occurrence, peak and recovery by gender and days following onset of infection

250x185mm (300 x 300 DPI)

Pre-view only

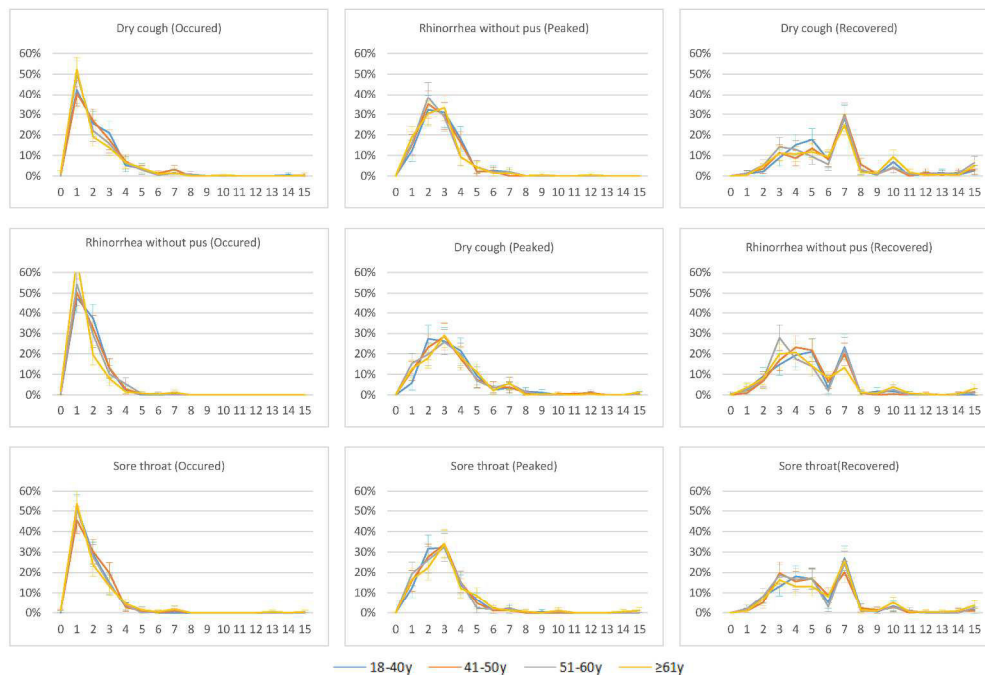

Appendix 3-1 Symptom occurrence, peak and recovery by age and days following onset of infection

251x176mm (300 x 300 DPI)

new only

1  
2  
3  
4  
5  
6  
7  
8  
9  
10  
11  
12  
13  
14  
15  
16  
17  
18  
19  
20  
21  
22  
23  
24  
25  
26  
27  
28  
29  
30  
31  
32  
33  
34  
35  
36  
37  
38  
39  
40  
41  
42  
43  
44  
45  
46  
47  
48  
49  
50  
51  
52  
53  
54  
55  
56  
57  
58  
59  
60

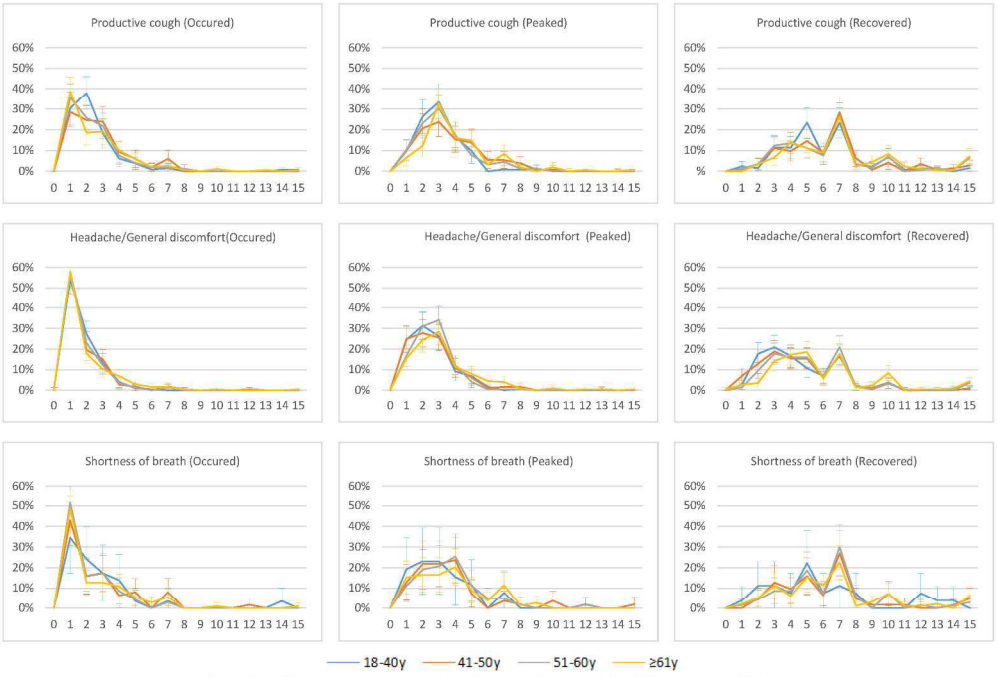

Appendix 3-2 Symptom occurrence, peak and recovery by age and days following onset of infection

251x176mm (300 x 300 DPI)

new only

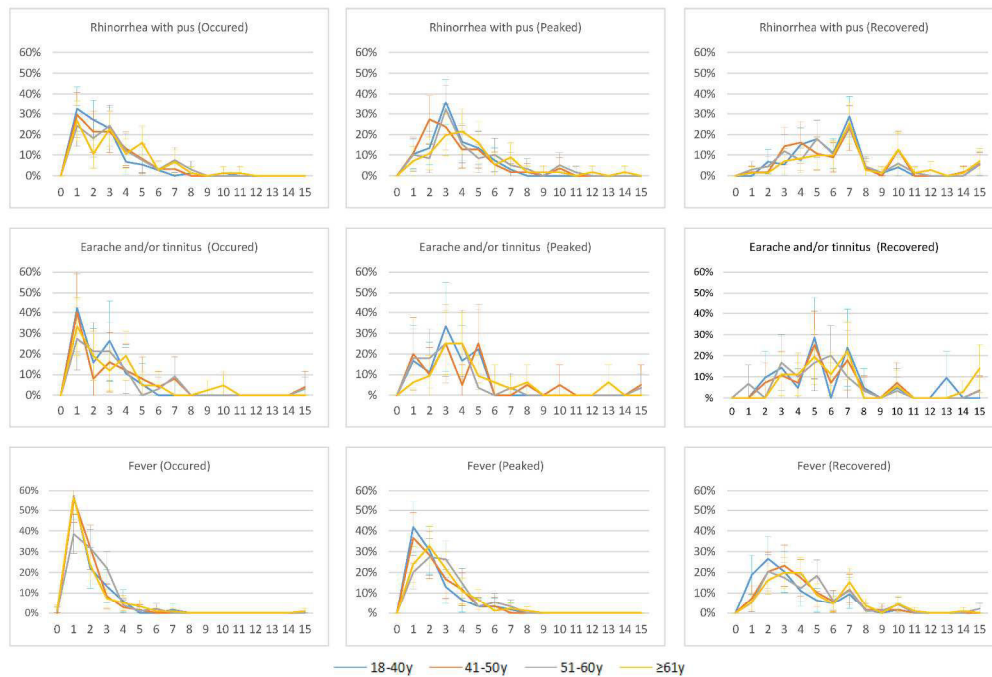

Appendix 3-3 Symptom occurrence, peak and recovery by age and days following onset of infection

251x175mm (300 x 300 DPI)

new only



1  
2  
3  
4  
5  
6  
7  
8  
9  
10  
11  
12  
13  
14  
15  
16  
17  
18  
19  
20  
21  
22  
23  
24  
25  
26  
27  
28  
29  
30  
31  
32  
33  
34  
35  
36  
37  
38  
39  
40  
41  
42  
43  
44  
45  
46  
47  
48  
49  
50  
51  
52  
53  
54  
55  
56  
57  
58  
59  
60

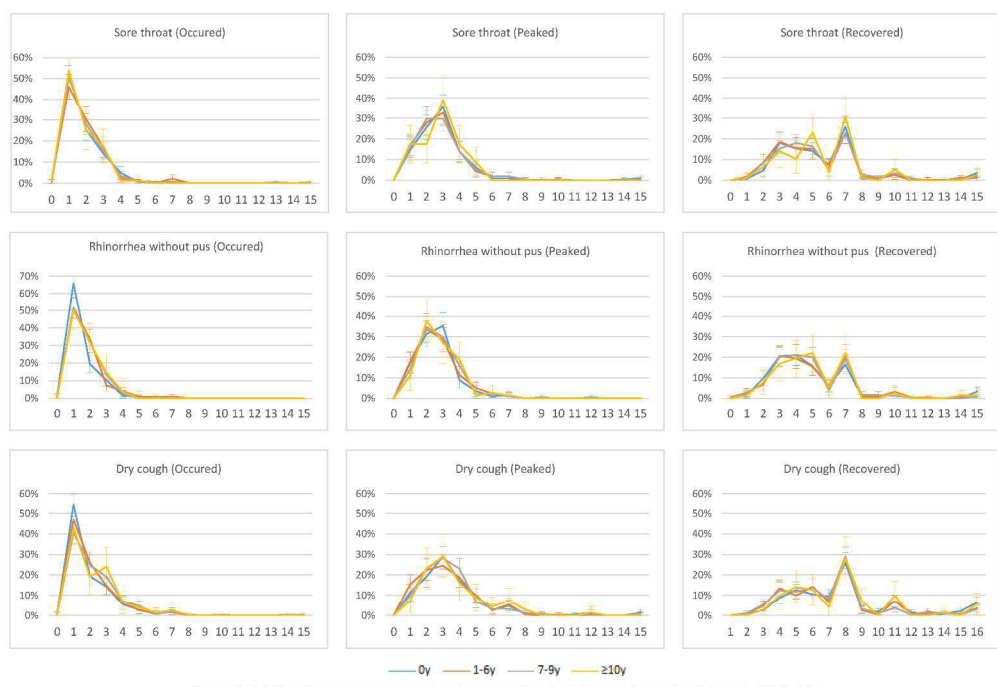

Appendix 4-1 Symptom occurrence, peak and recovery by education and days following onset of infection

252x175mm (300 x 300 DPI)

Review only

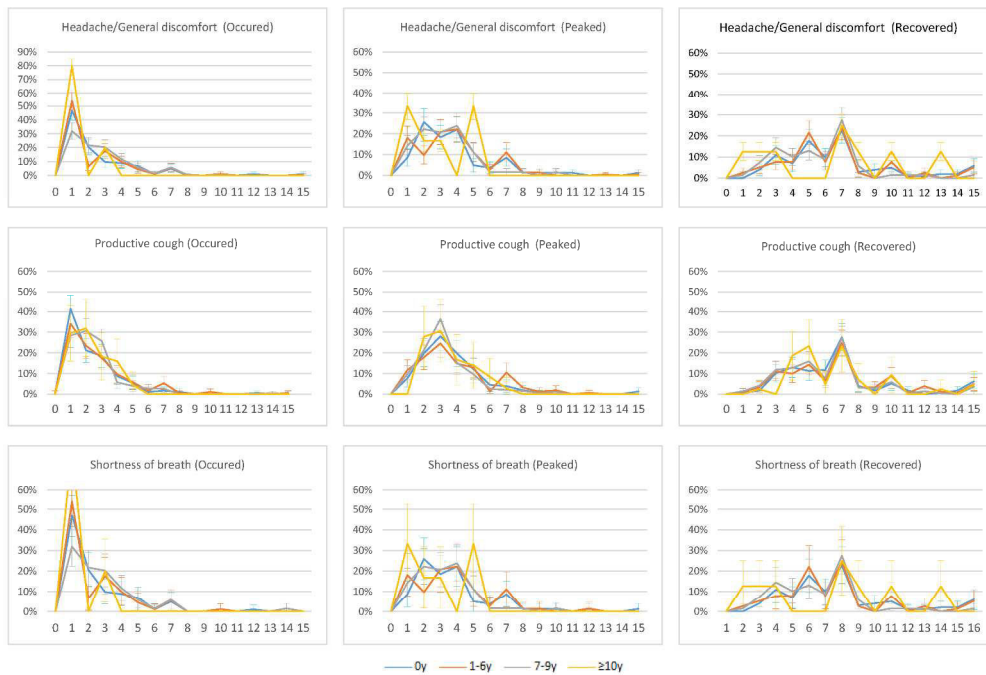

Appendix 4-2 Symptom occurrence, peak and recovery by education and days following onset of infection

251x176mm (300 x 300 DPI)

new only

1  
2  
3  
4  
5  
6  
7  
8  
9  
10  
11  
12  
13  
14  
15  
16  
17  
18  
19  
20  
21  
22  
23  
24  
25  
26  
27  
28  
29  
30  
31  
32  
33  
34  
35  
36  
37  
38  
39  
40  
41  
42  
43  
44  
45  
46  
47  
48  
49  
50  
51  
52  
53  
54  
55  
56  
57  
58  
59  
60

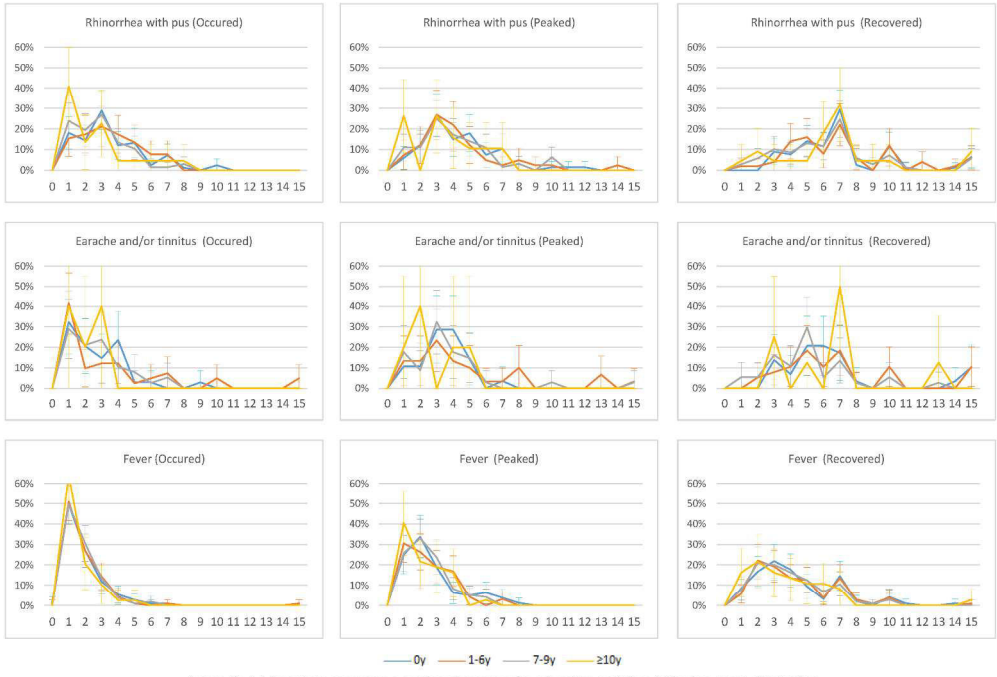

Appendix 4-3 Symptom occurrence, peak and recovery by education and days following onset of infection

252x175mm (300 x 300 DPI)

Review only

1  
2  
3  
4  
5  
6  
7  
8  
9  
10  
11  
12  
13  
14  
15  
16  
17  
18  
19  
20  
21  
22  
23  
24  
25  
26  
27  
28  
29  
30  
31  
32  
33  
34  
35  
36  
37  
38  
39  
40  
41  
42  
43  
44  
45  
46  
47  
48  
49  
50  
51  
52  
53  
54  
55  
56  
57  
58  
59  
60

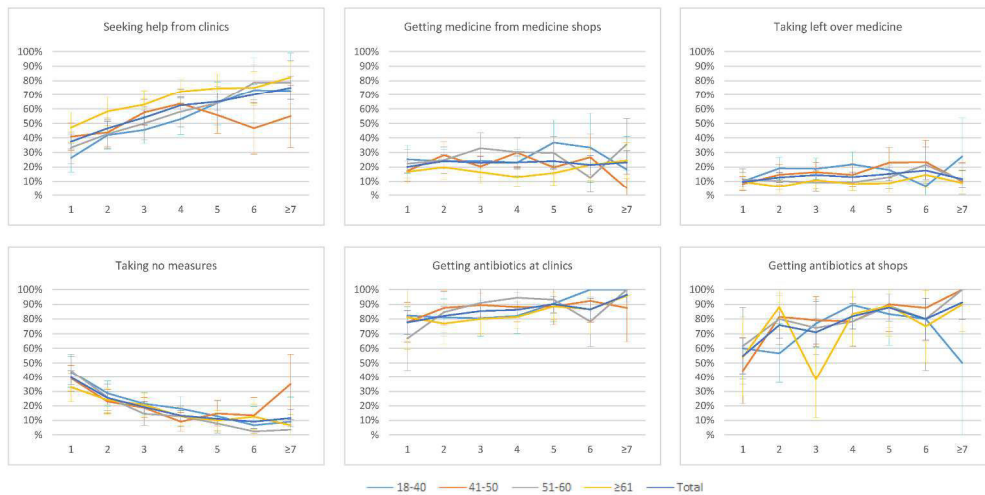

Appendix 5 Service-seeking by number of symptoms in total and by age

Note: The numbers along the horizontal axis stand for numbers of symptoms; medicines comprise all kinds of drugs used for treating illnesses and antibiotics are one kind of medicines

253x143mm (300 x 300 DPI)

Review only

1  
2  
3  
4  
5  
6  
7  
8  
9  
10  
11  
12  
13  
14  
15  
16  
17  
18  
19  
20  
21  
22  
23  
24  
25  
26  
27  
28  
29  
30  
31  
32  
33  
34  
35  
36  
37  
38  
39  
40  
41  
42  
43  
44  
45  
46  
47  
48  
49  
50  
51  
52  
53  
54  
55  
56  
57  
58  
59  
60

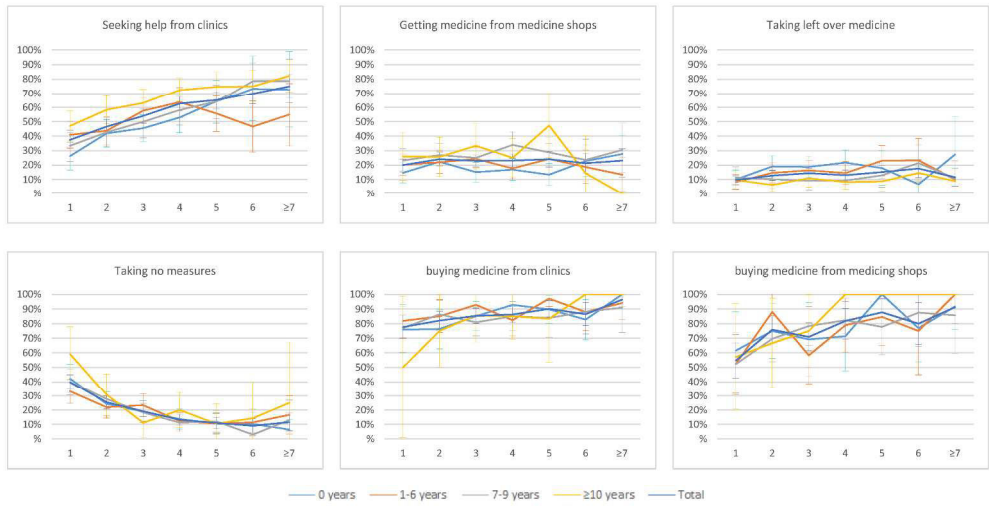

Appendix 6 Healthcare-seeking by number of symptoms in total and by education

Note: The numbers along the horizontal axis stand for numbers of symptoms; medicines comprise all kinds of drugs used for treating illnesses and antibiotics are one kind of medicines

254x148mm (300 x 300 DPI)

Review only

**STROBE 2007 (v4) Statement—Checklist of items that should be included in reports of *cross-sectional studies***

| Section/Topic                | Item # | Recommendation                                                                                                                                                                       | Reported on page # |
|------------------------------|--------|--------------------------------------------------------------------------------------------------------------------------------------------------------------------------------------|--------------------|
| Title and abstract           | 1      | (a) Indicate the study's design with a commonly used term in the title or the abstract                                                                                               | P1,2               |
|                              |        | (b) Provide in the abstract an informative and balanced summary of what was done and what was found                                                                                  | P2                 |
| <b>Introduction</b>          |        |                                                                                                                                                                                      |                    |
| Background/rationale         | 2      | Explain the scientific background and rationale for the investigation being reported                                                                                                 | P3-4               |
| Objectives                   | 3      | State specific objectives, including any prespecified hypotheses                                                                                                                     | P4                 |
| <b>Methods</b>               |        |                                                                                                                                                                                      |                    |
| Study design                 | 4      | Present key elements of study design early in the paper                                                                                                                              | P4-5               |
| Setting                      | 5      | Describe the setting, locations, and relevant dates, including periods of recruitment, exposure, follow-up, and data collection                                                      | P4-5               |
| Participants                 | 6      | (a) Give the eligibility criteria, and the sources and methods of selection of participants                                                                                          | P4-5               |
| Variables                    | 7      | Clearly define all outcomes, exposures, predictors, potential confounders, and effect modifiers. Give diagnostic criteria, if applicable                                             | P4-5               |
| Data sources/<br>measurement | 8*     | For each variable of interest, give sources of data and details of methods of assessment (measurement). Describe comparability of assessment methods if there is more than one group | P4-5               |
| Bias                         | 9      | Describe any efforts to address potential sources of bias                                                                                                                            | P4-5               |
| Study size                   | 10     | Explain how the study size was arrived at                                                                                                                                            | P4-5               |
| Quantitative variables       | 11     | Explain how quantitative variables were handled in the analyses. If applicable, describe which groupings were chosen and why                                                         | P17                |
| Statistical methods          | 12     | (a) Describe all statistical methods, including those used to control for confounding                                                                                                | P4                 |
|                              |        | (b) Describe any methods used to examine subgroups and interactions                                                                                                                  | NA                 |
|                              |        | (c) Explain how missing data were addressed                                                                                                                                          | P5                 |
|                              |        | (d) If applicable, describe analytical methods taking account of sampling strategy                                                                                                   | P4                 |
|                              |        | (e) Describe any sensitivity analyses                                                                                                                                                | NA                 |
| <b>Results</b>               |        |                                                                                                                                                                                      |                    |

|                          |     |                                                                                                                                                                                                              |        |
|--------------------------|-----|--------------------------------------------------------------------------------------------------------------------------------------------------------------------------------------------------------------|--------|
| Participants             | 13* | (a) Report numbers of individuals at each stage of study—eg numbers potentially eligible, examined for eligibility, confirmed eligible, included in the study, completing follow-up, and analysed            | P4, 15 |
|                          |     | (b) Give reasons for non-participation at each stage                                                                                                                                                         | P15    |
|                          |     | (c) Consider use of a flow diagram                                                                                                                                                                           | P15    |
| Descriptive data         | 14* | (a) Give characteristics of study participants (eg demographic, clinical, social) and information on exposures and potential confounders                                                                     | P6     |
|                          |     | (b) Indicate number of participants with missing data for each variable of interest                                                                                                                          | P5,15  |
| Outcome data             | 15* | Report numbers of outcome events or summary measures                                                                                                                                                         | P6-7   |
| Main results             | 16  | (a) Give unadjusted estimates and, if applicable, confounder-adjusted estimates and their precision (eg, 95% confidence interval). Make clear which confounders were adjusted for and why they were included | P18,21 |
|                          |     | (b) Report category boundaries when continuous variables were categorized                                                                                                                                    | P16-19 |
|                          |     | (c) If relevant, consider translating estimates of relative risk into absolute risk for a meaningful time period                                                                                             | P19    |
| Other analyses           | 17  | Report other analyses done—eg analyses of subgroups and interactions, and sensitivity analyses                                                                                                               | NA     |
| <b>Discussion</b>        |     |                                                                                                                                                                                                              |        |
| Key results              | 18  | Summarise key results with reference to study objectives                                                                                                                                                     | P7     |
| Limitations              | 19  | Discuss limitations of the study, taking into account sources of potential bias or imprecision. Discuss both direction and magnitude of any potential bias                                                   | P10    |
| Interpretation           | 20  | Give a cautious overall interpretation of results considering objectives, limitations, multiplicity of analyses, results from similar studies, and other relevant evidence                                   | P7-10  |
| Generalisability         | 21  | Discuss the generalisability (external validity) of the study results                                                                                                                                        | P10    |
| <b>Other information</b> |     |                                                                                                                                                                                                              |        |
| Funding                  | 22  | Give the source of funding and the role of the funders for the present study and, if applicable, for the original study on which the present article is based                                                | P11    |

\*Give information separately for cases and controls in case-control studies and, if applicable, for exposed and unexposed groups in cohort and cross-sectional studies.

**Note:** An Explanation and Elaboration article discusses each checklist item and gives methodological background and published examples of transparent reporting. The STROBE checklist is best used in conjunction with this article (freely available on the Web sites of PLoS Medicine at <http://www.plosmedicine.org/>, Annals of Internal Medicine at <http://www.annals.org/>, and Epidemiology at <http://www.epidem.com/>). Information on the STROBE Initiative is available at [www.strobe-statement.org](http://www.strobe-statement.org).

# BMJ Open

## How patients' experiences of respiratory tract infections affect healthcare seeking and antibiotic use: Insights from a cross sectional survey in rural Anhui, China

|                                 |                                                                                                                                                                                                                                                                                                                                                                                                                                                                                                                                                                                                                                                                                                                                                |
|---------------------------------|------------------------------------------------------------------------------------------------------------------------------------------------------------------------------------------------------------------------------------------------------------------------------------------------------------------------------------------------------------------------------------------------------------------------------------------------------------------------------------------------------------------------------------------------------------------------------------------------------------------------------------------------------------------------------------------------------------------------------------------------|
| Journal:                        | <i>BMJ Open</i>                                                                                                                                                                                                                                                                                                                                                                                                                                                                                                                                                                                                                                                                                                                                |
| Manuscript ID                   | bmjopen-2017-019492.R2                                                                                                                                                                                                                                                                                                                                                                                                                                                                                                                                                                                                                                                                                                                         |
| Article Type:                   | Research                                                                                                                                                                                                                                                                                                                                                                                                                                                                                                                                                                                                                                                                                                                                       |
| Date Submitted by the Author:   | 13-Dec-2017                                                                                                                                                                                                                                                                                                                                                                                                                                                                                                                                                                                                                                                                                                                                    |
| Complete List of Authors:       | Diao, MengJie; Anhui Medical University School of Health Service Management<br>Shen, Xingrong; Anhui Medical University, School of Health Service Management<br>Cheng, Jing; Anhui Medical University, School of Health Service Management<br>Chai, Jing; Anhui Medical University, School of Health Service Management<br>Feng, Rui; Anhui Medical University, Library Department of Literature Retrieval and Analysis<br>Panpan, Zhang; Anhui Medical University, School of Health Service Management<br>Rongyao, Zhou; Anhui Medical University, Anhui Medical University<br>Lambert, Helen; University of Bristol, Department of Population Health Sciences<br>Wang, DeBin; Anhui Medical University, School of Health Services Management |
| <b>Primary Subject Heading</b>: | Health services research                                                                                                                                                                                                                                                                                                                                                                                                                                                                                                                                                                                                                                                                                                                       |
| Secondary Subject Heading:      | Public health, Epidemiology, Health services research                                                                                                                                                                                                                                                                                                                                                                                                                                                                                                                                                                                                                                                                                          |
| Keywords:                       | Respiratory tract infection, Healthcare-seeking behavior, Rural residents, Antibiotics                                                                                                                                                                                                                                                                                                                                                                                                                                                                                                                                                                                                                                                         |
|                                 |                                                                                                                                                                                                                                                                                                                                                                                                                                                                                                                                                                                                                                                                                                                                                |

SCHOLARONE™  
Manuscripts



1           **How patients' experiences of respiratory tract infections affect**  
2           **healthcare seeking and antibiotic use: Insights from a cross sectional**  
3           **survey in rural Anhui, China**

4 Mengjie Diao\*, Xingrong Shen, Jing Cheng, Jing Chai, Rui Feng, Panpan zhang,  
5 Rongyao Zhou, Helen Lambert, Debin Wang<sup>#</sup>

6 **Corresponding author: Debin Wang.**

7 Post address: 81 Meishan Road, Hefei, Anhui, China, 230032.

8 Email: [dbwang@vip.sina.com](mailto:dbwang@vip.sina.com);

9 Tel/Fax: (0086) 0551-6511-6395.

10 **Mengjie Diao:** School of Health Service Management, Anhui Medical University,  
11 Hefei, Anhui, China.

12 **Xingrong Shen:** School of Health Service Management, Anhui Medical University,  
13 Hefei, Anhui, China.

14 **Jing Cheng:** School of Health Service Management, Anhui Medical University,  
15 Hefei, Anhui, China.

16 **Jing Chai:** School of Health Service Management, Anhui Medical University, Hefei,  
17 Anhui, China.

18 **Rui Feng:** Library Department of Literature Retrieval and Analysis, Anhui Medical  
19 University, Hefei, Anhui, China.

20 **Panpan zhang:** School of Health Service Management, Anhui Medical University,  
21 Hefei, Anhui, China.

22 **Rongyao Zhou:** School of Health Service Management, Anhui Medical University,  
23 Hefei, Anhui, China.

24 **Helen Lambert:** Department of Population Health Sciences, University of Bristol,  
25 Bristol, UK

26 **Debin Wang:** School of Health Service Management, Anhui Medical University,  
27 Hefei, Anhui, China.

28 **Word count: 2869**

## 1 Abstract

2 **Objective:** To investigate the occurrence and trajectory of reported RTI symptoms and their  
3 effects on use of self and professional care among patients in the community.

4 **Design:** A cross sectional retrospective household survey.

5 **Setting:** 12 administrative villages from rural Anhui, China.

6 **Participants:** 2160 rural adult residents aged  $\geq 18$  years registered as rural residents and  
7 actually living in the sampled villages when this study was conducted.

8 **Method:** The respondents were recruited using stratified-clustered randomized sampling. A  
9 structured questionnaire was deployed to solicit information about social demographics,  
10 symptoms of last respiratory tract infection (RTI) and healthcare-seeking following the RTI.  
11 Descriptive analyses were performed to investigate the reported symptoms and multivariate  
12 logistic regression models were developed to identify relationships between number of  
13 concurrent symptoms and healthcare-seeking and antibiotics use.

14 **Results:** A total of 1968 residents completed the survey, resulting in a response rate of  
15 91.1%. The number of concurrent symptoms showed a clear increasing trend with seeking  
16 help from clinics and being prescribed antibiotics. Multivariate regression revealed  
17 statistically significant associations between: a) visiting clinics and education(OR=0.790),  
18 sore throat(OR=1.355), cough(OR=1.492), shortness of breath(OR=1.707) and  
19 fever(OR=2.142); b) buying medicine from shops without prescription and  
20 education(OR=1.230) and cough(OR=1.452); c) getting antibiotics at clinics and sore  
21 throat(OR=2.05) and earache and/or tinnitus(OR=4.884) and d) obtaining antibiotics at  
22 medicine shops and productive cough(OR=1.971).

23 **Conclusions:** Reported RTI symptoms play an important role in shaping both patient- and  
24 doctor-led responses.

### 25 Strengths and limitations of this study

- 26 ● This study demonstrates relationships between patient-reported symptoms and  
27 RTI-related healthcare-seeking.
- 28 ● The study is the first to describe the collective effects of concurrent symptoms as  
29 perceived by patients experiencing them.
- 30 ● The study relies on subjective retrospective perceptions or self-reports and therefore  
31 may be biased by potential under- or over-reporting and recall bias.
- 32 ● The study used a broad definition of RTIs and the occurrence of symptoms may be  
33 distorted by seasonal and other variations when the study was conducted.

## 1 Background

2 Respiratory tract infections (RTIs) are the most common diseases in humans. Studies  
3 have demonstrated that adults usually experience 1–3 episodes of upper respiratory  
4 tract infection per year.[1,2] RTIs claim over 3 million lives annually and are the  
5 leading cause of death for children under 5 years.[3,4] Although many RTIs are mild  
6 and self-limiting, they are associated with a significant burden in terms of medical  
7 visits as well as work and school absenteeism.[5,6] The median duration of an  
8 episode of non-influenza-related viral respiratory tract infection (the most common  
9 but least serious kind of RTIs) is estimated to be 7.4 days, with 25% of cases lasting  
10 for 2 weeks.[7] In addition to the heavy burden on patients and health systems, RTIs  
11 are closely linked to antibiotic use and hence the development of antibiotic  
12 resistance. RTIs account for up to 60% of all antibiotic prescribing in UK primary  
13 care.[8,9] Excessive use of antibiotics is recognized as one of the most serious  
14 public health issues worldwide.[10]

15 According to the 10th edition of the International Classification of Diseases, RTIs  
16 comprise as many as 34 kinds of infections. However their symptoms are relatively  
17 limited, consisting mainly of sore throat, fever, cough, productive cough, rhinorrhea  
18 with or without pus, shortness of breath, headache and/or general discomfort,  
19 earache and/or tinnitus.[11,12] When faced with symptoms, patients' responses vary  
20 greatly. Some patients manage their symptoms by simply resting, drinking warm  
21 water etc. without using any medicines;[13] others buy medicines from medicine  
22 shops or pharmacies or seek professional help from doctors;[14-16] still others opt  
23 for traditional remedies.[17,18] A 2014 study of consumer attitudes on cough and  
24 cold in USA indicated that 36.1% of those surveyed reported beginning  
25 over-the-counter (OTC) treatment at the first sign of a cough or cold, 42.6% waited  
26 until cold symptoms 'get bad enough' (i.e. to cause distress) and another 20.2%  
27 waited until they had more than one symptom before beginning treatment.  
28 Altogether, 55% sought professional care eventually [19]. These varied responses  
29 have been attributed to a wide range of reasons including: features of the disease,  
30 such as severity of symptoms and their patterns of progression;[2] 'demand side'  
31 issues such as age, gender, education,[20] knowledge and attitudes about RTIs and  
32 RTI-related services,[21-25] cultural expectations and social norms;[26,27] and  
33 'supply side' factors such as perverse financial incentives, systemic pressures on  
34 healthcare providers and professional standards.[26,28,29]

35 RTIs are very common in China with an incidence rate ranging from 84.13% to  
36 120.83% in 2006.[30] This translates to 1.16 to 1.67 billion person-times of RTIs  
37 annually in the whole country. Data about service use for RTIs among China  
38 residents are scarce, but the limited research available reports huge discrepancies  
39 between different populations and very high use of antibiotics in various medical  
40 settings. An earlier study in rural primary care settings of 10 provinces in Western  
41 China found that nearly 50% of patients were prescribed antibiotics.[31] Another  
42 recent study found that antibiotics were prescribed for 78% of colds and 93.5% of

1 acute bronchitis cases.[32] According to our systemic literature review, few studies  
2 focus on factors affecting service and antibiotics use for RTIs or investigate reasons  
3 for variations in service use and antibiotic prescribing for RTIs in China. Although a  
4 number of papers on reasons for health service utilization in general did include  
5 RTIs as a subcomponent, they addressed only demand and supply side factors, with  
6 little attention being paid to RTI symptoms among patients in the community and  
7 their effects on decisions about self or professional care. This study aims to  
8 investigate reported RTI symptoms and their effects on use of self and professional  
9 care among patients in the community.

## 10 **Methods**

### 11 *Sites and population*

12 The study used a retrospective cross-sectional household survey design and adopted  
13 a stratified-clustered randomized sampling approach in recruiting site villages and  
14 participating residents. Selection of site villages proceeded in 4 steps. Step 1 divided  
15 all counties in Anhui province into north, middle and south regions. Step 2 randomly  
16 selected 4 counties from each of the three regions and 1 township from each of the  
17 counties selected and then 1 administrative village from each of the site townships  
18 selected above. Step 3 randomly selected 1 household from the village selected as  
19 the starting household and then recruited 180 households that were geographically  
20 closest to the starting household. Step 4 randomly selected one household member  
21 from each of these households according to preset eligibility criteria, i.e., men and  
22 women who were aged 18 years and over, were registered as rural residents and  
23 were actually living in the sampled villages when this study was conducted, and  
24 were willing and able to participate in the survey.

### 25 *Questionnaire*

26 The study used a structured questionnaire consisting of questions about four  
27 categories of variables: a) social demographics (e.g., gender, age and education); b)  
28 last episode of symptomatic RTI, including symptoms experienced and day on  
29 which each specific symptom occurred (DSO), reached its peak or became most  
30 serious (DSP) and recovery (DSR); c) responses to the RTI, including taking  
31 leftover medicines, buying any type of medicine OTC from medicine shops (here  
32 after referred to as buying medicine) and seeking treatment from clinics; d)  
33 antibiotics obtained from clinics and medicine shops. In China, a pharmacy  
34 generally refers to a department within a hospital or clinic that dispenses medicines  
35 to patients according to prescriptions by the clinicians working for the same  
36 hospital/clinic; while a medicine shop is an independent business that sells  
37 medicines to customers with or without prescriptions from clinicians. 'Seeking help  
38 from clinics' refers to visiting a local health facility staffed by a qualified health  
39 professional and is thus largely equivalent to 'seeking professional care' in western  
40 countries. Conversely, the use of antibiotics does not necessarily mean that  
41 professional care was sought. Antibiotics may be purchased from medicine shops

1 directly without prescription or kept at home for subsequent use. Almost all  
2 medicine shops in China sell both OTC and non-OTC medicines, including  
3 antibiotics. Although they may be displayed in separate cabinets, in practice  
4 non-OTC medicines may be purchased directly without prescription and customers  
5 generally do not distinguish these two types of medicines.

#### 6 *Data collection*

7 Field data collection took place from 30 April-12 May 2016 via face-to-face  
8 interviews using the structured questionnaire. Twenty-six under graduate students  
9 from Anhui Medical University performed the interviews. Measures taken to ensure  
10 data quality included: a) training and examination of the data collectors; b) daily  
11 checks by a quality control supervisor of all questionnaires completed each day; c)  
12 retest of 5% randomly selected subjects; d) feedback of errors found via daily  
13 checks and readministering of the questionnaire; e) elimination of disqualified field  
14 data collectors.

#### 15 *Data analysis*

16 Data were double-entered using EPI DATA 3.1 and SPSS 10.01 and Microsoft Excel  
17 2010 were used to analyze the data. Data analysis included: a) distribution of  
18 respondents by gender, age and education; b) multivariate logistic regression of  
19 healthcare-seeking and antibiotics use using social demographics and common  
20 symptoms as the independent variables; c) relationships between number of  
21 symptoms experienced by a single patient and his or her healthcare-seeking and  
22 antibiotics use. Cases with missing data were excluded from the data analyses.

#### 23 *Ethical review*

24 The study protocol was reviewed and approved by the Biomedical Ethics Committee  
25 of Anhui Medical University (reference number: 201500800) prior to the study  
26 commencing. Participation of rural residents was voluntary and written informed  
27 consent was obtained from all participants.

## 28 **Results**

### 29 **Overview of participants, symptoms and healthcare-seeking**

30 As shown in Figure 1 and Table 1, a total of 2160 residents were accessed and 1968  
31 completed the survey, resulting in a response rate of 91.1%. The mean age of  
32 respondents was 50.39 years (SD=13.04 years). The majority (68.0%) were females  
33 and around one third (29.6%) had no formal school education. The high proportion  
34 of female respondents in this random sample results from the fact that in this rural  
35 area the majority of male residents have moved to cities to obtain temporary work  
36 [33]. Over 80% of reported infections had occurred within nine months prior to the  
37 survey. Dry cough (58.9%, 1159), rhinorrhea without pus (51.7%, 1017) and sore  
38 throat (49.8%, 980) were the most common symptoms. 55.7% of respondents  
39 reported seeking professional help from clinics, 13.4% bought medicine from  
40 medicine shops, 23.1% used leftover medicine from previous illnesses and 20.8%  
41 did nothing. Altogether, 81.3% of respondents reported having used antibiotics to

1  
2  
3 1 treat their RTI. As shown in Table 2, Time interval between onset of infection and  
4 2 when the data were collected was not associated with any statistical differences  
5 3 between in healthcare-seeking behavior except use of leftover medicines, suggesting  
6 4 that recall bias had limited effects (see also Discussion and Limitations sections).

### 5 **Individual symptoms and treatment-seeking**

6 Table 3 displays logistic regression modeling between service use and individual  
7 symptoms and socio-demographic characteristics. Education was negatively  
8 associated with seeking help from clinics (OR=0.790[0.697-0.896]), but positively  
9 related with buying medicine (OR=1.230[1.068-1.417]) and using leftover medicine  
10 (OR=1.283[1.073-1.535]); Females were more likely to use leftover medicine than  
11 males (OR=2.016[1.411-2.881]), while age had no effects on any treatment-seeking  
12 behavior. When controlled for social demographic characteristics, buying medicine  
13 was positively related with cough (OR=1.452[1.124-1.875]); taking leftover  
14 medicine, with headache and soreness (OR=1.581[1.169-2.138]); and seeking help  
15 from clinics, with sore throat (OR=1.355[1.109-1.654]), cough  
16 (OR=1.492[1.198-1.859]), shortness of breath (OR=1.707[1.287-2.265]) and fever  
17 (OR=2.142[1.654-2.775]). Being prescribed antibiotics at clinics was related  
18 positively only to with earache and/or tinnitus (OR=4.884[1.162-20.522]), while  
19 purchasing antibiotics OTC from medicine shops was positively linked with  
20 productive cough (OR=1.971[1.125-3.453]). Rhinorrhea with or without pus are not  
21 associated with any specific treatment-seeking behavior.

### 22 **Concurrent symptoms and service use**

23 Figure 2 and Appendices 1-2 display the relationships between service-seeking and  
24 number of concurrent symptoms in total and by demographic characteristics. Overall,  
25 seeking help from clinics and getting antibiotics at clinics show a clear increasing  
26 trend with number of symptoms. Only 37.5% of respondents who had experienced  
27 one symptom had sought help from a clinic, while 75.0% those who had  
28 experienced over seven symptoms had done so. Similarly, the use of antibiotics at  
29 clinics increased from 77.7% for patients with one symptom to 96.4% for those with  
30 over seven symptoms. However buying medicine from shops, taking leftover  
31 medicine and getting antibiotics from shops showed no statistically significant trend  
32 as the number of symptoms increased. The relationships between number of  
33 symptoms and service-seeking were consistent across all gender, age and education  
34 subgroups. This inter-subgroup consistency was also observed in the null trend of  
35 getting antibiotics at clinics or at medicine shops by patients with increasing number  
36 of symptoms.

### 37 **Discussion**

38 This study has uncovered useful data for better understanding the experience of RTIs  
39 among patients in the community and their relations with healthcare seeking and



1 antibiotics use. The study showed selective associations between service use and  
2 socio-demographic characteristics. Education was negatively related to seeking help  
3 from clinics but positively associated with taking leftover medicine and buying  
4 medicine from shops; while females are more likely than males to take leftover  
5 medicine. However, specifically using antibiotics obtained from clinics and  
6 medicine shops did not show any statistically significant socio-demographic  
7 differences. These findings may suggest that decisions on whether or not to visit a  
8 clinic, take leftover medicine or buy medicine from a shop is made by patients  
9 themselves and is thus amenable to the influence of patients' socio-demographic  
10 characteristics; while the decision on whether or not to provide antibiotics to patients  
11 is determined mainly by the doctors at clinics or staff at medicine shops and thus is  
12 not affected by these characteristics.

13  
14 The study documented strong and consistent relations between symptoms and  
15 service-seeking. As the number of concurrent symptoms increased from 1 to 7 or  
16 more, the proportion of patients who had sought help from clinics increased from  
17 37.5% to 75.0% and the proportion of service seekers who had been prescribed  
18 antibiotics increased from 77.7% to 96.4%. These findings suggest that clustering of  
19 symptoms affect both patient- and doctor-led behavior and thus merit particular  
20 attention in future interventions. Interestingly, the difference in the percentage of  
21 service-seeking for patients with 1 symptom (37.5%) versus that for those with 7+  
22 symptoms (75.0%) is substantially greater than that of antibiotics prescribing (77.7%  
23 versus 96.4%). One possible explanation for this difference is that patients directly  
24 suffer from symptoms while professionals are only told about them by their patients,  
25 so patient-led behaviors (i.e. health service-seeking) may be more sensitive to  
26 symptoms than professional-led ones (i.e. antibiotics prescribing). [34,35] In  
27 addition, as lay persons, patients may not be as capable as doctors of distinguishing  
28 important from non-important symptoms, and so numbers of symptoms have closer  
29 links with perceptions of acute or serious illness among patients than among health  
30 professionals. As for the lack of correlation between number of symptoms and  
31 purchase of medicines from shops, this may reflect the combined effects of two  
32 drivers. On the one hand, more symptoms serve as a greater driver for patients to  
33 seek professional help from clinics as well as medicine shops. On the other, seeking  
34 help from clinics and shops are competitive behaviors and as patients experience  
35 more symptoms they are more likely to visit clinics than shops.

36  
37 In addition, positive relationships were found between a number of specific  
38 symptoms and service-seeking. Seeking help from clinics was linked to, in order of  
39 magnitude of logistic regression coefficient, fever ( $B=0.76$ ), shortness of breath  
40 ( $B=0.54$ ), cough ( $B=0.40$ ) and soreness ( $B=0.30$ ). These coefficients and their rank  
41 order reveal useful information about the perceived importance, suffering and  
42 urgency of each of the corresponding symptoms for patients. Compared with

1 seeking help from clinics, the driving symptoms for buying medicine from shops  
2 may be milder in nature and fewer in number, with only 1 symptom, dry cough,  
3 being positively associated with the latter behavior. This indicates that patients with  
4 equal access to the two kinds of help tend to choose clinics rather than shops if they  
5 have more and severer symptoms and vice versa. In addition, being given antibiotics  
6 at clinics was linked with earache and/or tinnitus and at medicine shops, with  
7 productive cough. These findings are consistent with published evidence.[36]

## 8 **Study Limitations**

9 The study has a number of limitations. First, the study relied on subjective  
10 perceptions and self-reports. Individuals are poor at accurately reporting certain  
11 health behaviors and feelings and inherent tendencies to respond in ways that make  
12 them appear healthier or otherwise conform to social norms may introduce bias.  
13 However, these characteristics are typically apparent across the board, reducing the  
14 effects of this threat to internal validity. More importantly, the long recall period  
15 between last experienced episode and survey data collection is likely to have led to  
16 recall bias; milder RTIs in particular, exact patterns of symptom experience and  
17 details of associated treatment-seeking behavior may have been forgotten. Our  
18 findings do suggest some extent of recall/memory bias, but Table 1 shows that there  
19 was no statistical relationship between time interval from onset of infection and data  
20 collection for any healthcare-seeking behavior except for use of leftover medicines,  
21 which was reported as 9.6% among patients with a time interval of over 9 months  
22 compared with 16.2% among patients with a less than 3 month time interval. Second,  
23 given the broad symptom-based definition of RTIs used in the study, seasonal and  
24 other influences on symptom occurrence may have affected the frequency of  
25 symptoms. Third, the overrepresentation of females may raise concerns about  
26 selection biases. However, our analysis revealed no significant differences by gender  
27 in terms of symptom-related treatment-seeking except for taking leftover medicines,  
28 which was more commonly reported by females.

29  
30 **Contributors** Mengjie Diao participated in data collection and drafted the  
31 manuscript. Xingrong Shen and Rui Feng designed the instruments and performed  
32 data analysis. Jing Cheng and Jing Chai implemented field data collection, trained  
33 data collectors and controlled data quality. Rongyao Zhou and Panpan Zhang  
34 implemented the data collection. Debin Wang provided expertise for overall design  
35 of the study and revised and finalized the manuscript. Helen Lambert contributed to  
36 the interpretation of data and revised and finalized the manuscript. All authors  
37 approved the final version to be published and agree to be accountable for all aspects  
38 of the work in ensuring that questions related to the accuracy or integrity of any part  
39 of the work are appropriately investigated and resolved.

40  
41 **Funding** This study was supported partly by China-UK Prosperity Found (Grant



number PPYCHN1590/15SS19) and partly by the National Nature Science Foundation of China and the Medical Research Council of the United Kingdom (Grant number 81661138001 and 71704003).

**Declaration of Conflicting Interests** The authors declare no potential conflicts of interest with respect to the research, authors and/or publication of this article.

**Data sharing statement** Anonymised participant data used in the preparation of this article will be made available on request from the lead author.

## References

1. Leder K, Sinclair M I, Mitakakis T Z, et al. A community-based study of respiratory episodes in Melbourne, Australia[J]. *Aust N Z J Public Health*.2003;27(4): 399–404.DOI: 10.1111/j.1467-842X.2003.tb00416.x [PubMed:14705301]
2. Hull J D, Barton I P, Torgersen J, et al. A Survey of the Experience and Impact of Acute Upper Respiratory Tract Infections on People in Six Countries in the 2011/2012 Common Cold and Flu Season[J]. *Open Journal of Respiratory Diseases*, 2013,03(4):175-187.DOI: 10.4236/ojrd.2013.34026
3. Collaborators M C O D. Global, regional, and national age-sex specific all-cause and cause-specific mortality for 240 causes of death, 1990-2013: a systematic analysis for the Global Burden of Disease Study 2013.[J]. *Lancet*, 2015, 385(9963):117-171.DOI: 10.1016/S0140-6736(14)61682-2. [PubMed: 25530442]
4. More than 1.2 million adolescents die every year, nearly all preventable.<http://www.who.int/mediacentre/news/releases/2017/yearly-adolescent-deaths/en/> (accessed 5 Jul 2017).
5. Adam PF, Hendershot GE, Marano MA. Current estimates from the National Health Interview Survey [J]. *Vital Health Stat*, 1999, 10(6):59-66. [Pubmed:15782448]
6. Opping R, Coast J, Hood K, et al. Resource use and costs of treating acute cough/lower respiratory tract infections in 13 European countries: results and challenges[J]. *European Journal of Health Economics*, 2011, 12(4):319-329. DOI: 10.1007/s10198-010-0239-1. [Pubmed:20364288]
7. Thompson M, Vodicka T A, Blair P S, et al. Duration of symptoms of respiratory tract infections in children: systematic review[J]. *Bmj British Medical Journal*, 2013, 347(dec11 1):f7027.DOI: 1136/bmj.f7027 [PubMed: 24335668]
8. Petersen I, Hayward A C. Antibacterial prescribing in primary care[J]. *Journal of Antimicrobial Chemotherapy*, 2007, 60 Suppl 1(Supplement 1):i43.DOI:10.1093/jac/dkm156[PubMed: 17656380]
9. Gulliford M C, Dregan A, Moore M V, et al. Continued high rates of antibiotic prescribing to adults with respiratory tract infection: survey of 568 UK general practices[J]. *Bmj Open*, 2014, 4(10):e006245.DOI: 10.1136/bmjopen-2014-006245.[PubMed:PMC4212213]
10. Costelloe C, Metcalfe C, Lovering A, et al. Effect of antibiotic prescribing in primary care on antimicrobial resistance in individual patients: systematic review and meta-analysis[J]. *Bmj*, 2010, 340(7756):1120-1120.DOI: 10.1136/bmj.c2096.[PubMed: 20483949]
11. Lu Y, Tong J, Pei F, et al. Viral aetiology in adults with acute upper respiratory tract infection in Jinan, Northern China.[J]. *Clinical & Developmental Immunology*, 2013, 2013(2):

- 1 869521-869521. DOI: 10.1155/2013/869521.[PubMed:PMC3649347 ]
- 2
- 3 12. Kochen M M, Susanne F, Thomas F, et al. Influence of patient symptoms and physical
- 4 findings on general practitioners' treatment of respiratory tract infections: a direct
- 5 observation study[J]. *Bmc Family Practice*, 2005, 6(1):1-7.DOI:10.1186/1471-2296-6-6
- 6 [PubMed:PMC550651 ]
- 7
- 8 13. Halvorsen P A, Godycki-Cwirko M, Wennevold K, et al. Would GPs advise patients with
- 9 respiratory tract infections to refrain from exercise, stay indoors or stay in bed? Survey of
- 10 GPs in Poland and Norway[J]. *European Journal of General Practice*, 2013,
- 11 20(3):209-213.DOI: 10.3109/13814788.2013.848339.[PubMed: 24219344 ]
- 12
- 13 14. Ahmad A, Patel I, Mohanta G P, et al. Evaluation of Self Medication Practices in Rural Area
- 14 of Town Sahaswan at Northern India[J]. *Annals of medical and health sciences research*,
- 15 2014, 4(2):73-8.DOI: 10.4103/2141-9248.138012.[PubMed: PMC4145522 ]
- 16
- 17 15. Courtenay M, Rowbotham S, Lim R, et al. Antibiotics for acute respiratory tract infections: a
- 18 mixed-methods study of patient experiences of non-medical prescriber management[J]. *Bmj*
- 19 *Open*, 2017, 7(3):e013515.DOI: 10.1136/bmjopen-2016-013515.[PubMed: PMC5353344]
- 20
- 21 16. Essack S, Pignatari A C. A framework for the non-antibiotic management of upper
- 22 respiratory tract infections: towards a global change in antibiotic resistance.[J]. *International*
- 23 *Journal of Clinical Practice*, 2013, 67(Supplement s180):4-9.DOI:10.1111/ijcp.12335.
- 24 [PubMed: 24238424]
- 25
- 26 17. Wang X, Liu Z. Prevention and treatment of viral respiratory infections by traditional
- 27 Chinese herbs[J]. *Chinese medical journal*, 2014, 127(7):1344-1350.DOI: 10.3760/
- 28 *cma.j.issn.0366-6999.20132029* [PubMed: 24709192]
- 29
- 30 18. Wun Y T, Tai P L, Lam K F, et al. Comparison of the knowledge, attitudes and practice with
- 31 antibiotic use between traditional Chinese medicine and western medicine usual attenders in
- 32 Hong Kong[J]. *Complementary Therapies in Medicine*, 2014, 22(1):99-106.DOI:
- 33 10.1016/j.ctim.2013.11.004.[PubMed: 24559824]
- 34
- 35 19. Blaiss M, Dicipinigaitis P, Eccles R, et al. Consumer Attitudes on Cough and Cold: US
- 36 (ACHOO) Survey Results.[J]. *Current Medical Research & Opinion*, 2015(8):1527-
- 37 1538.DOI: 10.1185/03007995.2014.1002558.[PubMed: 25535904]
- 38
- 39 20. Birk H O, Gut R, Henriksen L O. Patients' experience of choosing an outpatient clinic in one
- 40 county in Denmark: results of a patient survey[J]. *BMC Health Serv Res.*, 2011,
- 41 11(1):262.DOI: 10.1186/1472-6963-11-262.[PubMed: PMC3205034]
- 42
- 43 22. Kaae S, Malaj A, Hoxha I. Antibiotic knowledge, attitudes and behaviours of Albanian health
- 44 care professionals and patients – a qualitative interview study[J]. *J Pharm Policy Pract.* ,
- 45 2017, 10(1):13.DOI: 10.1186/s40545-017-0102-1. [PubMed: PMC5379499]
- 46
- 47 23. Hawking M K, Lecky D M, Lundgren P T, et al. Attitudes and behaviours of adolescents
- 48 towards antibiotics and self-care for respiratory tract infections: a qualitative study[J]. *Bmj*
- 49 *Open*, 2017, 7(5):e015308.DOI: 1136/bmjopen-2016-015308. [PubMed: 28592579]
- 50
- 51 24. Rebnord I K, Sandvik H, Mjelle A B, et al. Factors predicting antibiotic prescription and
- 52 referral to hospital for children with respiratory symptoms: secondary analysis of a
- 53 randomised controlled study at out-of-hours services in primary care[J]. *Bmj Open*, 2017,
- 54 7(1):e012992.
- 55
- 56
- 57
- 58
- 59
- 60

- 1  
2  
3 1 25. Rebnord I K, Sandvik H, Mjelle A B, et al. Out-of-hours antibiotic prescription after  
4 2 screening with C reactive protein: a randomised controlled study[J]. *Bmj Open*, 2016,  
5 3 6(5):e011231.  
6  
7 4 26. Hopkins S. Cultural and Socioeconomic Determinants of Antibiotic Use[M]// *Antibiotic*  
8 5 *Policies: Fighting Resistance*. Springer US, 2008:29-40.  
9  
10 6 27. Gach O, Troisfontaines P, Legrand V. Identification of cultural determinants of antibiotic use  
11 7 cited in primary care in Europe: a mixed research synthesis study of integrated design  
12 8 “Culture is all around us”[J]. *Bmc Public Health*, 2015, 15(1):1-9.DOI:10.1186/  
13 9 s12889-015-2254-8. [Pubmed: PMC4574721]  
14  
15 10 28. Reynolds L, Mckee M. Factors influencing antibiotic prescribing in China: An exploratory  
16 11 analysis[J]. *Health Policy*, 2009, 90(1):32.DOI: 10.1016/j.healthpol.2008.09. 002. [Pubmed:  
17 12 18849089]  
18  
19 13 29. Cho HJ, Hong SJ, Park S. Knowledge and beliefs of primary care physicians, pharmacists,  
20 14 and parents on antibiotic use for the pediatric common cold. *Soc Sci Med* 2004; 58:623–  
21 15 9.DOI:org/10.1016/S0277-9536(03)00231-4 [Pubmed:14652058]  
22  
23 16 30. Ning R G, Min K, Zhen H Z. Analysis of the incidence and treatment of common cold in  
24 17 Guangzhou residents in 2006[J]. *Southern China preventive medicine*, 2008, 34(4):  
25 18 46-48.DOI: 1671 -5039( 2008) 04 -0046 -03  
26  
27 19 31. Dong L, Yan H, Wang D. Antibiotic prescribing patterns in village health clinics across 10  
28 20 provinces of Western China[J]. *Antimicrob Chemother* 2008;62:410–5.DOI: 10.1093/  
29 21 jac/dkn153. [Pubmed:18400805]  
30  
31 22 32. Wang J, Wang P, Wang X et al. Use and prescription of antibiotics in primary health care  
32 23 settings in China. *JAMA Intern Med*2014;174:1914–20.DOI: 10.1001/jamainternmed.  
33 24 2014.5214. [Pubmed:25285394]  
34  
35 25 33. Chai J, Chen P, Feng R, et al. Life events and chronic physical conditions among left-behind  
36 26 farmers in rural China a cross-sectional study[J]. *Bmc Public Health*, 2015, 15(1):594.  
37  
38 27 34. Tan Y S, Hong C Y, Chong P N, et al. Knowledge that upper respiratory tract infection  
39 28 resolves on its own is associated with more appropriate health-seeking behavior and  
40 29 antibiotic cognition.[J]. *Singapore Medical Journal*, 2006, 47(6):518.DOI: 10.1016/  
41 30 j.socscimed.2015.05.027. [Pubmed: 16752021]  
42  
43 31 35. Grigoryan L, Burgerhof J G M, Haaijerruskamp F M, et al. Is self-medication with  
44 32 antibiotics in Europe driven by prescribed use?[J]. *Journal of Antimicrobial Chemotherapy*,  
45 33 2007, 59(1):152-6.DOI:10.1093/jac/dkl457 [Pubmed: 17124192]  
46  
47 34 36. Chang A B, Oppenheimer J J, Weinberger M, et al. Children With Chronic Wet or Productive  
48 35 Cough—Treatment and Investigations:A Systematic Review[J]. *Chest*, 2016, 149(1):120-142.  
49 36 DOI: 10.1378/chest.15-2065. [Pubmed: 26757284]

50 37 Table 1 Characteristics of 1968 adults with respiratory tract infection

51  
52  
53 38 Figure 1 Flow chart describing symptoms, healthcare-seeking and antibiotics use among study  
54 39 population

- 1
- 2
- 3 1 Table2 Service use by time interval in between onset of infection and data collection
- 4
- 5 2 Table3 Multivariate logistic regression models between service-seeking and specific symptoms
- 6
- 7
- 8 3 Figure 2 Service-seeking by number of symptoms in total and by genders
- 9

For peer review only

1  
2  
3  
4  
5  
6  
7 1 Table 1 Characteristics of 1968 adults with respiratory tract infection

|           | Male      | Female    | Total     |
|-----------|-----------|-----------|-----------|
| Age       |           |           |           |
| 18-40y    | 128(20.3) | 317(23.7) | 445(22.6) |
| 41-50y    | 152(24.1) | 360(26.9) | 512(26.0) |
| 51-60y    | 134(21.3) | 323(24.1) | 457(23.3) |
| ≥61y      | 216(34.3) | 338(25.3) | 554(28.2) |
| Education |           |           |           |
| 0y        | 95(15.1)  | 487(36.4) | 582(29.6) |
| 1-6y      | 195(31.0) | 390(29.1) | 585(29.7) |
| 7-9y      | 269(42.7) | 360(26.9) | 629(32.0) |
| ≥10y      | 71(11.3)  | 101(7.5)  | 172(8.7)  |
| Total     | 630       | 1338      | 1968      |

23  
24  
25 Table 2 Service use by time interval between onset of infection and data collection

| Time interval (Days) | Total      | Buying medicine from medicine shops | Taking leftover medicine | Seeking help from clinics | Getting antibiotics at clinics | Getting antibiotics at medicine shops |
|----------------------|------------|-------------------------------------|--------------------------|---------------------------|--------------------------------|---------------------------------------|
| ≤90                  | 844(44.6%) | 196(23.3%)                          | 136(16.2%)               | 475(56.3%)                | 315(86.1%)                     | 144(77.4%)                            |
| 91-180               | 494(26.1%) | 107(21.8%)                          | 60(12.2%)                | 276(55.9%)                | 177(85.9%)                     | 67(67.0%)                             |
| 181-270              | 192(10.2%) | 51(26.6%)                           | 18(9.4%)                 | 110(57.3%)                | 72(85.7%)                      | 38(80.9%)                             |
| ≥271                 | 361(19.1%) | 80(22.2%)                           | 34(9.6%)                 | 198(54.8%)                | 116(84.7%)                     | 59(78.7%)                             |
| $\chi^2$             |            | 1.907                               | 13.438                   | 0.355                     | 0.165                          | 5.409                                 |
| <i>P</i>             |            | 0.592                               | <b>0.004</b>             | 0.949                     | 0.983                          | 0.144                                 |

Table 3 Multivariate logistic regression models between service-seeking and specific symptoms

|                             | buying medicine from shops (n1=1484,n2=445) |                    | taking leftover medicine (n1=1668, n2=257) |                    | Seeking help from clinics (n1=857,n2=1078) |                    | Getting antibiotics at clinics (n1=117, n2=692) |                     | Getting antibiotics at shops (n1=103, n2=313) |                    |
|-----------------------------|---------------------------------------------|--------------------|--------------------------------------------|--------------------|--------------------------------------------|--------------------|-------------------------------------------------|---------------------|-----------------------------------------------|--------------------|
|                             | OR                                          | 95%CI              | OR                                         | 95%CI              | OR                                         | 95%CI              | OR                                              | 95%CI               | OR                                            | 95%CI              |
| Gender                      | 1.085                                       | 0.840-1.400        | <b>2.016</b>                               | <b>1.411-2.881</b> | 0.819                                      | 0.653-1.027        | 0.952                                           | 0.592-1.532         | 0.863                                         | 0.497-1.498        |
| Age                         | 0.984                                       | 0.873-1.109        | 0.866                                      | 0.742-1.011        | 1.104                                      | 0.993-1.227        | 0.887                                           | 0.704-1.118         | 1.022                                         | 0.789-1.324        |
| Education                   | <b>1.23</b>                                 | <b>1.068-1.417</b> | <b>1.283</b>                               | <b>1.073-1.535</b> | <b>0.79</b>                                | <b>0.697-0.896</b> | 0.849                                           | 0.646-1.114         | 1.133                                         | 0.842-1.523        |
| Sore throat                 | 1.016                                       | 0.810-1.275        | 1.303                                      | 0.971-1.748        | <b>1.355</b>                               | <b>1.109-1.654</b> | <b>2.05</b>                                     | <b>1.337-3.143</b>  | 1.604                                         | 0.990-2.599        |
| Rhinorrhea without pus      | 0.838                                       | 0.669-1.051        | 1.057                                      | 0.791-1.411        | 1.045                                      | 0.856-1.276        | 1.25                                            | 0.816-1.915         | 0.792                                         | 0.486-1.290        |
| Rhinorrhea with pus         | 0.96                                        | 0.714-1.292        | 0.78                                       | 0.531-1.145        | 1.045                                      | 0.804-1.359        | 1.013                                           | 0.566-1.813         | 1.796                                         | 0.869-3.711        |
| Dry cough                   | <b>1.452</b>                                | <b>1.124-1.875</b> | 0.809                                      | 0.587-1.114        | <b>1.492</b>                               | <b>1.198-1.859</b> | 1.318                                           | 0.812-2.140         | 1.328                                         | 0.777-2.269        |
| Productive cough            | 1.026                                       | 0.798-1.318        | 1.28                                       | 0.926-1.770        | 1.115                                      | 0.891-1.395        | 0.907                                           | 0.561-1.466         | <b>1.971</b>                                  | <b>1.125-3.453</b> |
| Shortness of breath,        | 0.782                                       | 0.571-1.071        | 0.695                                      | 0.458-1.054        | <b>1.707</b>                               | <b>1.287-2.265</b> | 0.927                                           | 0.533-1.613         | 1.049                                         | 0.488-2.255        |
| Earache/tinnitus            | 1.421                                       | 0.979-2.063        | 1.305                                      | 0.825-2.063        | 0.757                                      | 0.535-1.072        | <b>4.884</b>                                    | <b>1.162-20.522</b> | 1.489                                         | 0.608-3.648        |
| Headache general discomfort | 1.102                                       | 0.875-1.389        | 1.581                                      | 1.169-2.138        | 1.178                                      | 0.962-1.443        | 1.184                                           | 0.765-1.831         | 1.026                                         | 0.623-1.690        |
| Fever                       | 0.778                                       | 0.583-1.037        | 1.223                                      | 0.866-1.725        | <b>2.142</b>                               | <b>1.654-2.775</b> | 1.33                                            | 0.791-2.236         | 1.74                                          | 0.833-3.633        |

Note: n1 and n2 stands for the number of no and yes response respectively to each service use behavior; for each service use behavior, no (n1) was coded as 0 and yes(n2), as 1. Gender: 1=male,2=female; Age group: 1= ≤40y, 2=41-50y, 3=51-60y,4= ≥61y; Educatio: 1=0 years,2=1-6 years ,3=7-9 years ,4=≥10 years. Symptoms: no= 0 and yes= 1; Medicines comprise all kinds of drugs used for treating illnesses and antibiotics are one kind of medicines.



Figure 1 Flow chart describing symptoms, healthcare-seeking and antibiotics use among study population

224x136mm (300 x 300 DPI)

Review only

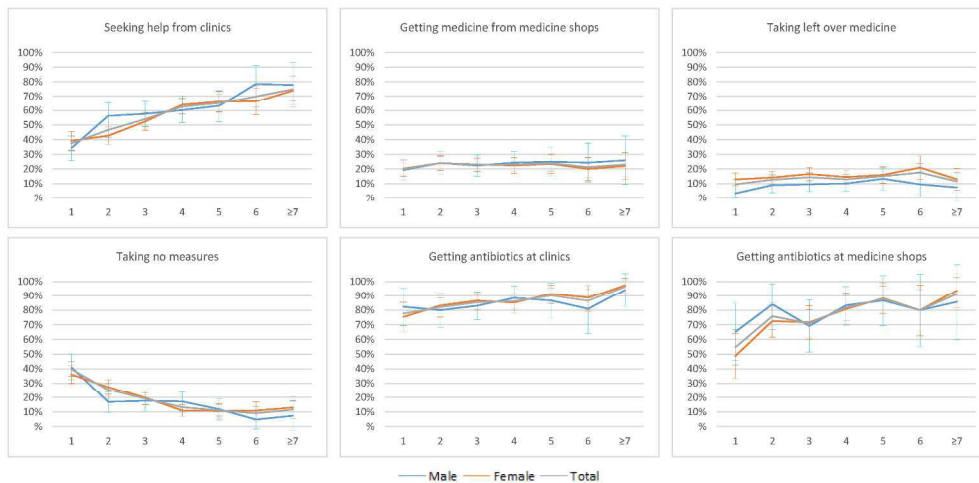

Figure 2 Healthcare-seeking by number of symptoms in total and by genders  
 Note: The numbers along the horizontal axis stand for numbers of symptoms; medicines comprise all kinds of drugs used for treating illnesses and antibiotics are one kind of medicines.

251x121mm (300 x 300 DPI)



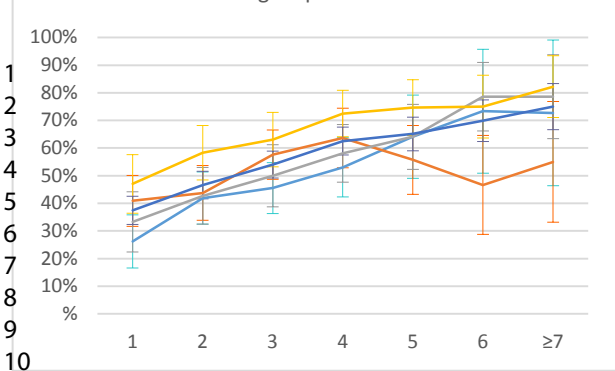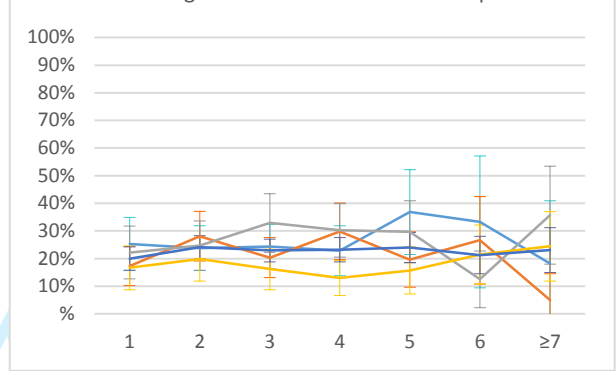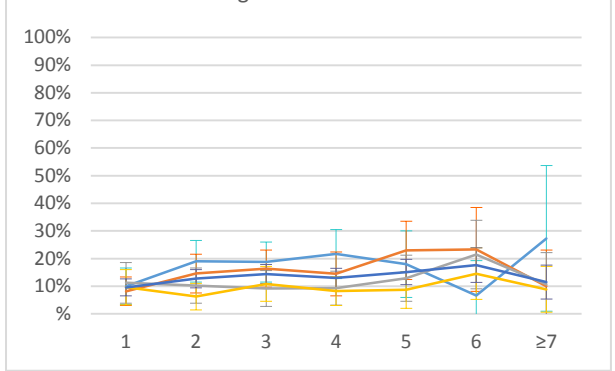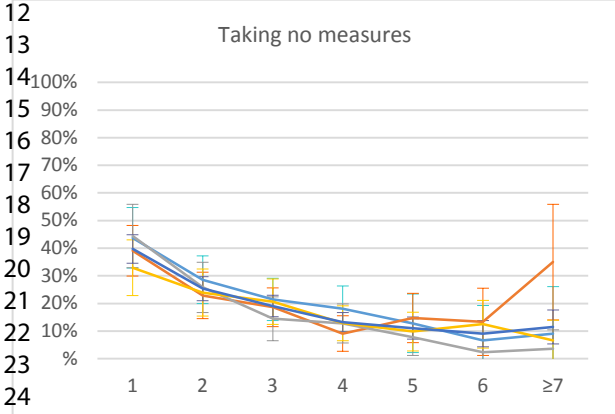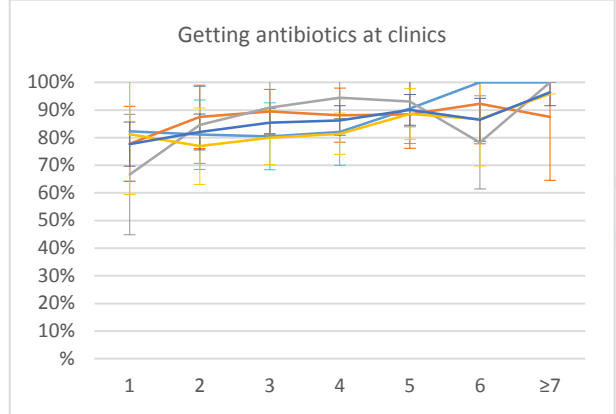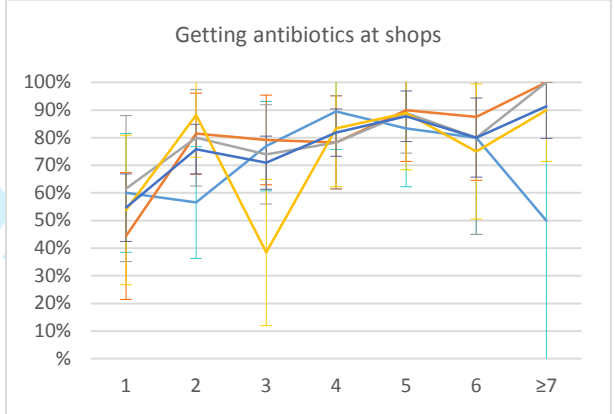

— 18-40 — 41-50 — 51-60 — ≥61 — Total

Appendix 1 Service-seeking by number of symptoms in total and by age

For peer review only - <http://bmjopen.bmj.com/site/about/guidelines.xhtml>

(Note: The numbers along the horizontal axis stand for numbers of symptoms; medicines comprise all kinds of drugs used for treating illnesses and antibiotics are one kind of medicines)

Seeking help from clinics

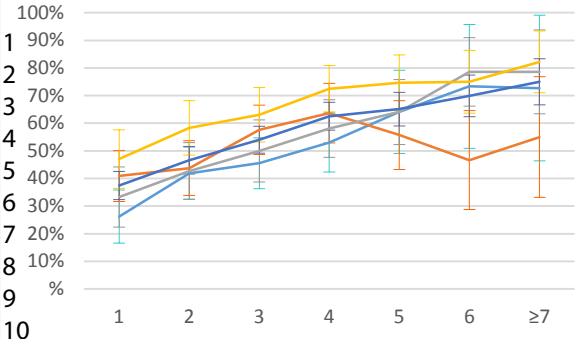

Getting medicine from medicine shops

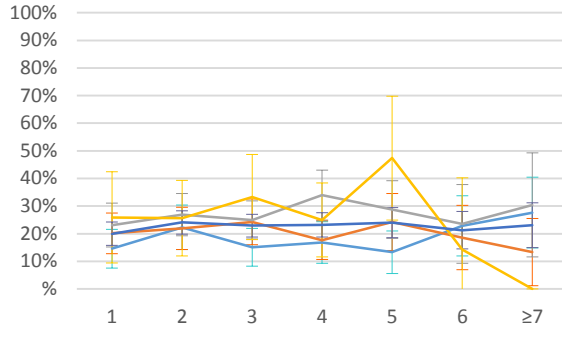

Taking left over medicine

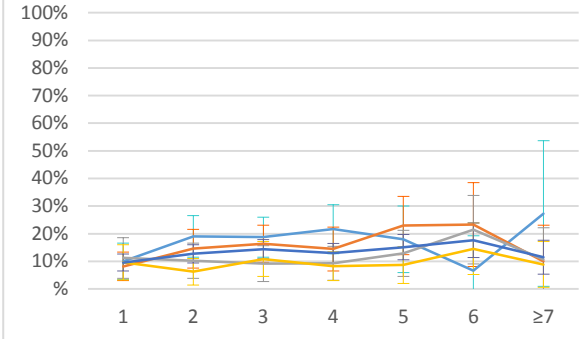

Taking no measures

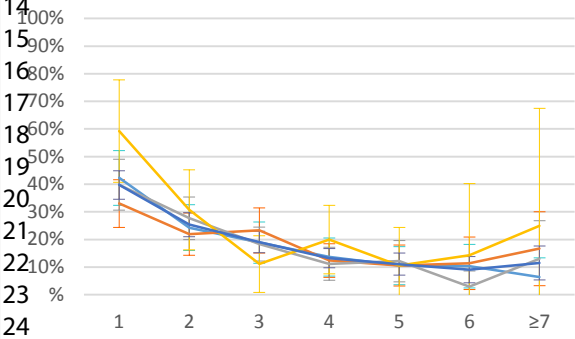

buying medicine from clinics

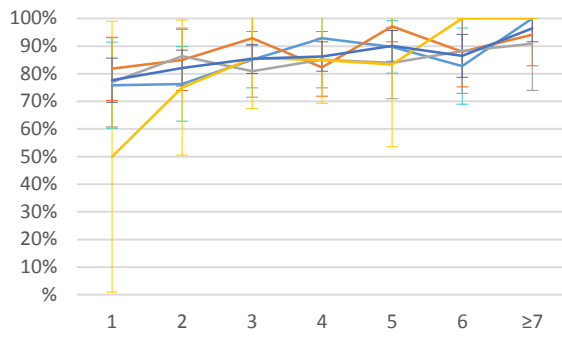

buying medicine from medicing shops

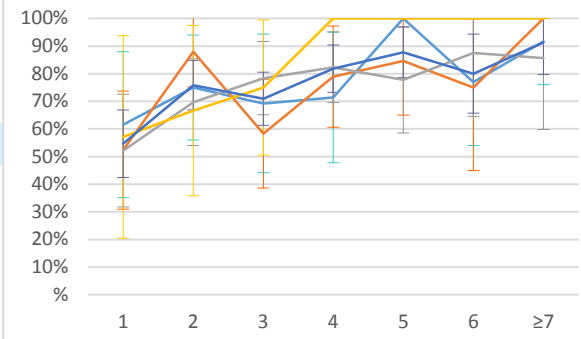

— 0 years — 1-6 years — 7-9 years — ≥10 years — Total

Appendix 2 Healthcare-seeking by number of symptoms in total and by education

For peer review only - <http://bmjopen.bmj.com/site/about/guidelines.xhtml>

(Note: The numbers along the horizontal axis stand for numbers of symptoms; medicines comprise all kinds of drugs used for treating illnesses and antibiotics are

one kind of medicines)

**STROBE 2007 (v4) Statement—Checklist of items that should be included in reports of *cross-sectional studies***

| Section/Topic                | Item # | Recommendation                                                                                                                                                                       | Reported on page # |
|------------------------------|--------|--------------------------------------------------------------------------------------------------------------------------------------------------------------------------------------|--------------------|
| <b>Title and abstract</b>    | 1      | (a) Indicate the study's design with a commonly used term in the title or the abstract                                                                                               | P1,2               |
|                              |        | (b) Provide in the abstract an informative and balanced summary of what was done and what was found                                                                                  | P2                 |
| <b>Introduction</b>          |        |                                                                                                                                                                                      |                    |
| Background/rationale         | 2      | Explain the scientific background and rationale for the investigation being reported                                                                                                 | P3-4               |
| Objectives                   | 3      | State specific objectives, including any prespecified hypotheses                                                                                                                     | P4                 |
| <b>Methods</b>               |        |                                                                                                                                                                                      |                    |
| Study design                 | 4      | Present key elements of study design early in the paper                                                                                                                              | P4-5               |
| Setting                      | 5      | Describe the setting, locations, and relevant dates, including periods of recruitment, exposure, follow-up, and data collection                                                      | P4-5               |
| Participants                 | 6      | (a) Give the eligibility criteria, and the sources and methods of selection of participants                                                                                          | P4-5               |
| Variables                    | 7      | Clearly define all outcomes, exposures, predictors, potential confounders, and effect modifiers. Give diagnostic criteria, if applicable                                             | P4-5               |
| Data sources/<br>measurement | 8*     | For each variable of interest, give sources of data and details of methods of assessment (measurement). Describe comparability of assessment methods if there is more than one group | P5-6               |
| Bias                         | 9      | Describe any efforts to address potential sources of bias                                                                                                                            | P8                 |
| Study size                   | 10     | Explain how the study size was arrived at                                                                                                                                            | P4                 |
| Quantitative variables       | 11     | Explain how quantitative variables were handled in the analyses. If applicable, describe which groupings were chosen and why                                                         | P4                 |
| Statistical methods          | 12     | (a) Describe all statistical methods, including those used to control for confounding                                                                                                | P4                 |
|                              |        | (b) Describe any methods used to examine subgroups and interactions                                                                                                                  | NA                 |
|                              |        | (c) Explain how missing data were addressed                                                                                                                                          | P5                 |
|                              |        | (d) If applicable, describe analytical methods taking account of sampling strategy                                                                                                   | P4                 |
|                              |        | (e) Describe any sensitivity analyses                                                                                                                                                | NA                 |
| <b>Results</b>               |        |                                                                                                                                                                                      |                    |

|                          |     |                                                                                                                                                                                                              |      |
|--------------------------|-----|--------------------------------------------------------------------------------------------------------------------------------------------------------------------------------------------------------------|------|
| Participants             | 13* | (a) Report numbers of individuals at each stage of study—eg numbers potentially eligible, examined for eligibility, confirmed eligible, included in the study, completing follow-up, and analysed            | P5   |
|                          |     | (b) Give reasons for non-participation at each stage                                                                                                                                                         | P5   |
|                          |     | (c) Consider use of a flow diagram                                                                                                                                                                           | P5   |
| Descriptive data         | 14* | (a) Give characteristics of study participants (eg demographic, clinical, social) and information on exposures and potential confounders                                                                     | P5   |
|                          |     | (b) Indicate number of participants with missing data for each variable of interest                                                                                                                          | P5   |
| Outcome data             | 15* | Report numbers of outcome events or summary measures                                                                                                                                                         | P5   |
| Main results             | 16  | (a) Give unadjusted estimates and, if applicable, confounder-adjusted estimates and their precision (eg, 95% confidence interval). Make clear which confounders were adjusted for and why they were included | P6   |
|                          |     | (b) Report category boundaries when continuous variables were categorized                                                                                                                                    | P5,6 |
|                          |     | (c) If relevant, consider translating estimates of relative risk into absolute risk for a meaningful time period                                                                                             | P6   |
| Other analyses           | 17  | Report other analyses done—eg analyses of subgroups and interactions, and sensitivity analyses                                                                                                               | NA   |
| <b>Discussion</b>        |     |                                                                                                                                                                                                              |      |
| Key results              | 18  | Summarise key results with reference to study objectives                                                                                                                                                     | P7   |
| Limitations              | 19  | Discuss limitations of the study, taking into account sources of potential bias or imprecision. Discuss both direction and magnitude of any potential bias                                                   | P8   |
| Interpretation           | 20  | Give a cautious overall interpretation of results considering objectives, limitations, multiplicity of analyses, results from similar studies, and other relevant evidence                                   | P7-8 |
| Generalisability         | 21  | Discuss the generalisability (external validity) of the study results                                                                                                                                        | P8   |
| <b>Other information</b> |     |                                                                                                                                                                                                              |      |
| Funding                  | 22  | Give the source of funding and the role of the funders for the present study and, if applicable, for the original study on which the present article is based                                                | P9   |

\*Give information separately for cases and controls in case-control studies and, if applicable, for exposed and unexposed groups in cohort and cross-sectional studies.

**Note:** An Explanation and Elaboration article discusses each checklist item and gives methodological background and published examples of transparent reporting. The STROBE checklist is best used in conjunction with this article (freely available on the Web sites of PLoS Medicine at <http://www.plosmedicine.org/>, Annals of Internal Medicine at <http://www.annals.org/>, and Epidemiology at <http://www.epidem.com/>). Information on the STROBE Initiative is available at [www.strobe-statement.org](http://www.strobe-statement.org).

**STROBE 2007 (v4) Statement—Checklist of items that should be included in reports of *cross-sectional studies***

| Section/Topic             | Item # | Recommendation                                                                                                                                                                       | Reported on page # |
|---------------------------|--------|--------------------------------------------------------------------------------------------------------------------------------------------------------------------------------------|--------------------|
| Title and abstract        | 1      | (a) Indicate the study’s design with a commonly used term in the title or the abstract                                                                                               | P1,2               |
|                           |        | (b) Provide in the abstract an informative and balanced summary of what was done and what was found                                                                                  | P2                 |
| <b>Introduction</b>       |        |                                                                                                                                                                                      |                    |
| Background/rationale      | 2      | Explain the scientific background and rationale for the investigation being reported                                                                                                 | P3-4               |
| Objectives                | 3      | State specific objectives, including any prespecified hypotheses                                                                                                                     | P4                 |
| <b>Methods</b>            |        |                                                                                                                                                                                      |                    |
| Study design              | 4      | Present key elements of study design early in the paper                                                                                                                              | P4-5               |
| Setting                   | 5      | Describe the setting, locations, and relevant dates, including periods of recruitment, exposure, follow-up, and data collection                                                      | P4-5               |
| Participants              | 6      | (a) Give the eligibility criteria, and the sources and methods of selection of participants                                                                                          | P4-5               |
| Variables                 | 7      | Clearly define all outcomes, exposures, predictors, potential confounders, and effect modifiers. Give diagnostic criteria, if applicable                                             | P4-5               |
| Data sources/ measurement | 8*     | For each variable of interest, give sources of data and details of methods of assessment (measurement). Describe comparability of assessment methods if there is more than one group | P4-5               |
| Bias                      | 9      | Describe any efforts to address potential sources of bias                                                                                                                            | P4-5               |
| Study size                | 10     | Explain how the study size was arrived at                                                                                                                                            | P4-5               |
| Quantitative variables    | 11     | Explain how quantitative variables were handled in the analyses. If applicable, describe which groupings were chosen and why                                                         | P17                |
| Statistical methods       | 12     | (a) Describe all statistical methods, including those used to control for confounding                                                                                                | P4                 |
|                           |        | (b) Describe any methods used to examine subgroups and interactions                                                                                                                  | NA                 |
|                           |        | (c) Explain how missing data were addressed                                                                                                                                          | P5                 |
|                           |        | (d) If applicable, describe analytical methods taking account of sampling strategy                                                                                                   | P4                 |
|                           |        | (e) Describe any sensitivity analyses                                                                                                                                                | NA                 |
| <b>Results</b>            |        |                                                                                                                                                                                      |                    |

|                          |     |                                                                                                                                                                                                              |        |
|--------------------------|-----|--------------------------------------------------------------------------------------------------------------------------------------------------------------------------------------------------------------|--------|
| Participants             | 13* | (a) Report numbers of individuals at each stage of study—eg numbers potentially eligible, examined for eligibility, confirmed eligible, included in the study, completing follow-up, and analysed            | P4, 15 |
|                          |     | (b) Give reasons for non-participation at each stage                                                                                                                                                         | P15    |
|                          |     | (c) Consider use of a flow diagram                                                                                                                                                                           | P15    |
| Descriptive data         | 14* | (a) Give characteristics of study participants (eg demographic, clinical, social) and information on exposures and potential confounders                                                                     | P6     |
|                          |     | (b) Indicate number of participants with missing data for each variable of interest                                                                                                                          | P5,15  |
| Outcome data             | 15* | Report numbers of outcome events or summary measures                                                                                                                                                         | P6-7   |
| Main results             | 16  | (a) Give unadjusted estimates and, if applicable, confounder-adjusted estimates and their precision (eg, 95% confidence interval). Make clear which confounders were adjusted for and why they were included | P18,21 |
|                          |     | (b) Report category boundaries when continuous variables were categorized                                                                                                                                    | P16-19 |
|                          |     | (c) If relevant, consider translating estimates of relative risk into absolute risk for a meaningful time period                                                                                             | P19    |
| Other analyses           | 17  | Report other analyses done—eg analyses of subgroups and interactions, and sensitivity analyses                                                                                                               | NA     |
| <b>Discussion</b>        |     |                                                                                                                                                                                                              |        |
| Key results              | 18  | Summarise key results with reference to study objectives                                                                                                                                                     | P7     |
| Limitations              | 19  | Discuss limitations of the study, taking into account sources of potential bias or imprecision. Discuss both direction and magnitude of any potential bias                                                   | P10    |
| Interpretation           | 20  | Give a cautious overall interpretation of results considering objectives, limitations, multiplicity of analyses, results from similar studies, and other relevant evidence                                   | P7-10  |
| Generalisability         | 21  | Discuss the generalisability (external validity) of the study results                                                                                                                                        | P10    |
| <b>Other information</b> |     |                                                                                                                                                                                                              |        |
| Funding                  | 22  | Give the source of funding and the role of the funders for the present study and, if applicable, for the original study on which the present article is based                                                | P11    |

\*Give information separately for cases and controls in case-control studies and, if applicable, for exposed and unexposed groups in cohort and cross-sectional studies.

**Note:** An Explanation and Elaboration article discusses each checklist item and gives methodological background and published examples of transparent reporting. The STROBE checklist is best used in conjunction with this article (freely available on the Web sites of PLoS Medicine at <http://www.plosmedicine.org/>, Annals of Internal Medicine at <http://www.annals.org/>, and Epidemiology at <http://www.epidem.com/>). Information on the STROBE Initiative is available at [www.strobe-statement.org](http://www.strobe-statement.org).

# BMJ Open

## How patients' experiences of respiratory tract infections affect healthcare seeking and antibiotic use: Insights from a cross sectional survey in rural Anhui, China

|                                 |                                                                                                                                                                                                                                                                                                                                                                                                                                                                                                                                                                                                                                                                                                                                                |
|---------------------------------|------------------------------------------------------------------------------------------------------------------------------------------------------------------------------------------------------------------------------------------------------------------------------------------------------------------------------------------------------------------------------------------------------------------------------------------------------------------------------------------------------------------------------------------------------------------------------------------------------------------------------------------------------------------------------------------------------------------------------------------------|
| Journal:                        | <i>BMJ Open</i>                                                                                                                                                                                                                                                                                                                                                                                                                                                                                                                                                                                                                                                                                                                                |
| Manuscript ID                   | bmjopen-2017-019492.R3                                                                                                                                                                                                                                                                                                                                                                                                                                                                                                                                                                                                                                                                                                                         |
| Article Type:                   | Research                                                                                                                                                                                                                                                                                                                                                                                                                                                                                                                                                                                                                                                                                                                                       |
| Date Submitted by the Author:   | 19-Dec-2017                                                                                                                                                                                                                                                                                                                                                                                                                                                                                                                                                                                                                                                                                                                                    |
| Complete List of Authors:       | Diao, MengJie; Anhui Medical University School of Health Service Management<br>Shen, Xingrong; Anhui Medical University, School of Health Service Management<br>Cheng, Jing; Anhui Medical University, School of Health Service Management<br>Chai, Jing; Anhui Medical University, School of Health Service Management<br>Feng, Rui; Anhui Medical University, Library Department of Literature Retrieval and Analysis<br>Panpan, Zhang; Anhui Medical University, School of Health Service Management<br>Rongyao, Zhou; Anhui Medical University, Anhui Medical University<br>Lambert, Helen; University of Bristol, Department of Population Health Sciences<br>Wang, DeBin; Anhui Medical University, School of Health Services Management |
| <b>Primary Subject Heading</b>: | Health services research                                                                                                                                                                                                                                                                                                                                                                                                                                                                                                                                                                                                                                                                                                                       |
| Secondary Subject Heading:      | Public health, Health services research, General practice / Family practice                                                                                                                                                                                                                                                                                                                                                                                                                                                                                                                                                                                                                                                                    |
| Keywords:                       | Respiratory tract infection, Antibiotics, Rural residents, healthcare seeking                                                                                                                                                                                                                                                                                                                                                                                                                                                                                                                                                                                                                                                                  |
|                                 |                                                                                                                                                                                                                                                                                                                                                                                                                                                                                                                                                                                                                                                                                                                                                |

SCHOLARONE™  
Manuscripts

1           **How patients' experiences of respiratory tract infections affect**  
2           **healthcare seeking and antibiotic use: Insights from a cross sectional**  
3           **survey in rural Anhui, China**

4 Mengjie Diao\*, Xingrong Shen, Jing Cheng, Jing Chai, Rui Feng, Panpan zhang,  
5 Rongyao Zhou, Helen Lambert, Debin Wang<sup>#</sup>

6 **Corresponding author: Debin Wang.**

7 Post address: 81 Meishan Road, Hefei, Anhui, China, 230032.

8 Email: [dbwang@vip.sina.com](mailto:dbwang@vip.sina.com);

9 Tel/Fax: (0086) 0551-6511-6395.

10 **Mengjie Diao:** School of Health Service Management, Anhui Medical University,  
11 Hefei, Anhui, China.

12 **Xingrong Shen:** School of Health Service Management, Anhui Medical University,  
13 Hefei, Anhui, China.

14 **Jing Cheng:** School of Health Service Management, Anhui Medical University,  
15 Hefei, Anhui, China.

16 **Jing Chai:** School of Health Service Management, Anhui Medical University, Hefei,  
17 Anhui, China.

18 **Rui Feng:** Library Department of Literature Retrieval and Analysis, Anhui Medical  
19 University, Hefei, Anhui, China.

20 **Panpan zhang:** School of Health Service Management, Anhui Medical University,  
21 Hefei, Anhui, China.

22 **Rongyao Zhou:** School of Health Service Management, Anhui Medical University,  
23 Hefei, Anhui, China.

24 **Helen Lambert:** Department of Population Health Sciences, University of Bristol,  
25 Bristol, UK

26 **Debin Wang:** School of Health Service Management, Anhui Medical University,  
27 Hefei, Anhui, China.

28 **Word count: 2848**



## 1 Abstract

2 **Objective:** To investigate the occurrence of reported RTI symptoms and their effects on use  
3 of self and professional care among patients in the community.

4 **Design:** A cross sectional retrospective household survey.

5 **Setting:** 12 administrative villages from rural Anhui, China.

6 **Participants:** 2160 rural adult residents aged  $\geq 18$  years registered as rural residents and  
7 actually living in the sampled villages when this study was conducted.

8 **Method:** The respondents were recruited using stratified-clustered randomized sampling. A  
9 structured questionnaire was deployed to solicit information about social demographics,  
10 symptoms of last respiratory tract infection (RTI) and healthcare-seeking following the RTI.  
11 Descriptive analyses were performed to investigate the reported symptoms and multivariate  
12 logistic regression models were developed to identify relationships between number of  
13 concurrent symptoms and healthcare-seeking and antibiotics use.

14 **Results:** A total of 1968 residents completed the survey, resulting in a response rate of  
15 91.1%. The number of concurrent symptoms showed a clear increasing trend with seeking  
16 help from clinics and being prescribed antibiotics. Multivariate regression revealed  
17 statistically significant associations between: a) visiting clinics and education(OR=0.790),  
18 sore throat(OR=1.355), cough(OR=1.492), shortness of breath(OR=1.707) and fever(OR=  
19 2.142); b) buying medicine from shops without prescription and education(OR=1.230) and  
20 cough(OR=1.452); c) getting antibiotics at clinics and sore throat(OR=2.05) and earache  
21 and/or tinnitus(OR=4.884) and d) obtaining antibiotics at medicine shops and productive  
22 cough(OR=1.971).

23 **Conclusions:** Reported RTI symptoms play an important role in shaping both patient- and  
24 doctor-led responses.

### 25 Strengths and limitations of this study

- 26 ● This study demonstrates relationships between patient-reported symptoms and  
27 RTI-related healthcare-seeking.
- 28 ● The study is the first to describe the collective effects of concurrent symptoms as  
29 perceived by patients experiencing them.
- 30 ● The study relies on subjective retrospective perceptions or self-reports and therefore  
31 may be biased by potential under- or over-reporting and recall bias.
- 32 ● The study used a broad definition of RTIs and the occurrence of symptoms may be  
33 distorted by seasonal and other variations when the study was conducted.

## 1 Background

2 Respiratory tract infections (RTIs) are the most common diseases in humans. Studies  
3 have demonstrated that adults usually experience 1–3 episodes of upper respiratory  
4 tract infection per year.[1,2] RTIs claim over 3 million lives annually and are the  
5 leading cause of death for children under 5 years.[3,4] Although many RTIs are mild  
6 and self-limiting, they are associated with a significant burden in terms of medical  
7 visits as well as work and school absenteeism.[5,6] The median duration of an  
8 episode of non-influenza-related viral respiratory tract infection (the most common  
9 but least serious kind of RTIs) is estimated to be 7.4 days, with 25% of cases lasting  
10 for 2 weeks.[7] In addition to the heavy burden on patients and health systems, RTIs  
11 are closely linked to antibiotic use and hence the development of antibiotic  
12 resistance. RTIs account for up to 60% of all antibiotic prescribing in UK primary  
13 care.[8,9] Excessive use of antibiotics is recognized as one of the most serious  
14 public health issues worldwide.[10]

15 According to the 10th edition of the International Classification of Diseases, RTIs  
16 comprise as many as 34 kinds of infections. However their symptoms are relatively  
17 limited, consisting mainly of sore throat, fever, cough, productive cough, rhinorrhea  
18 with or without pus, shortness of breath, headache and/or general discomfort,  
19 earache and/or tinnitus.[11,12] When faced with symptoms, patients' responses vary  
20 greatly. Some patients manage their symptoms by simply resting, drinking warm  
21 water etc. without using any medicines;[13] others buy medicines from medicine  
22 shops or pharmacies or seek professional help from doctors;[14-16] still others opt  
23 for traditional remedies.[17,18] A 2014 study of consumer attitudes on cough and  
24 cold in USA indicated that 36.1% of those surveyed reported beginning  
25 over-the-counter (OTC) treatment at the first sign of a cough or cold, 42.6% waited  
26 until cold symptoms 'get bad enough' (i.e. to cause distress) and another 20.2%  
27 waited until they had more than one symptom before beginning treatment.  
28 Altogether, 55% sought professional care eventually [19]. These varied responses  
29 have been attributed to a wide range of reasons including: features of the disease,  
30 such as severity of symptoms and their patterns of progression;[2] 'demand side'  
31 issues such as age, gender, education,[20] knowledge and attitudes about RTIs and  
32 RTI-related services,[21-25] cultural expectations and social norms;[26,27] and  
33 'supply side' factors such as perverse financial incentives, systemic pressures on  
34 healthcare providers and professional standards.[26,28,29]

35 RTIs are very common in China with an incidence rate ranging from 84.13% to  
36 120.83% in 2006.[30] This translates to 1.16 to 1.67 billion person-times of RTIs  
37 annually in the whole country. Data about service use for RTIs among China  
38 residents are scarce, but the limited research available reports huge discrepancies  
39 between different populations and very high use of antibiotics in various medical  
40 settings. An earlier study in rural primary care settings of 10 provinces in Western  
41 China found that nearly 50% of patients were prescribed antibiotics.[31] Another  
42 recent study found that antibiotics were prescribed for 78% of colds and 93.5% of

1 acute bronchitis cases.[32] According to our systemic literature review, few studies  
2 focus on factors affecting service and antibiotics use for RTIs or investigate reasons  
3 for variations in service use and antibiotic prescribing for RTIs in China. Although a  
4 number of papers on reasons for health service utilization in general did include  
5 RTIs as a subcomponent, they addressed only demand and supply side factors, with  
6 little attention being paid to RTI symptoms among patients in the community and  
7 their effects on decisions about self or professional care. This study aims to  
8 investigate reported RTI symptoms and their effects on use of self and professional  
9 care among patients in the community.

## 10 **Methods**

### 11 *Sites and population*

12 The study used a retrospective cross-sectional household survey design and adopted  
13 a stratified-clustered randomized sampling approach in recruiting site villages and  
14 participating residents. Selection of site villages proceeded in 4 steps. Step 1 divided  
15 all counties in Anhui province into north, middle and south regions. Step 2 randomly  
16 selected 4 counties from each of the three regions and 1 township from each of the  
17 counties selected and then 1 administrative village from each of the site townships  
18 selected above. Step 3 randomly selected 1 household from the village selected as  
19 the starting household and then recruited 180 households that were geographically  
20 closest to the starting household. Step 4 randomly selected one household member  
21 from each of these households according to preset eligibility criteria, i.e., men and  
22 women who were aged 18 years and over, were registered as rural residents and  
23 were actually living in the sampled villages when this study was conducted, and  
24 were willing and able to participate in the survey.

### 25 *Questionnaire*

26 The study used a structured questionnaire consisting of questions about four  
27 categories of variables: a) social demographics (e.g., gender, age and education); b)  
28 last episode of symptomatic RTI, including symptoms experienced; c) responses to  
29 the RTI, including taking leftover medicines, buying any type of medicine OTC  
30 from medicine shops (here after referred to as buying medicine) and seeking  
31 treatment from clinics; d) antibiotics obtained from clinics and medicine shops. In  
32 China, a pharmacy generally refers to a department within a hospital or clinic that  
33 dispenses medicines to patients according to prescriptions by the clinicians working  
34 for the same hospital/clinic; while a medicine shop is an independent business that  
35 sells medicines to customers with or without prescriptions from clinicians. 'Seeking  
36 help from clinics' refers to visiting a local health facility staffed by a qualified health  
37 professional and is thus largely equivalent to 'seeking professional care' in western  
38 countries. Conversely, the use of antibiotics does not necessarily mean that  
39 professional care was sought. Antibiotics may be purchased from medicine shops  
40 directly without prescription or kept at home for subsequent use. Almost all  
41 medicine shops in China sell both OTC and non-OTC medicines, including

1 antibiotics. Although they may be displayed in separate cabinets, in practice  
2 non-OTC medicines may be purchased directly without prescription and customers  
3 generally do not distinguish these two types of medicines.

#### 4 *Data collection*

5 Field data collection took place from 30 April-12 May 2016 via face-to-face  
6 interviews using the structured questionnaire. Twenty-six under graduate students  
7 from Anhui Medical University performed the interviews. Measures taken to ensure  
8 data quality included: a) training and examination of the data collectors; b) daily  
9 checks by a quality control supervisor of all questionnaires completed each day; c)  
10 retest of 5% randomly selected subjects; d) feedback of errors found via daily  
11 checks and readministering of the questionnaire; e) elimination of disqualified field  
12 data collectors.

#### 13 *Data analysis*

14 Data were double-entered using EPI DATA 3.1 and SPSS 10.01 and Microsoft Excel  
15 2010 were used to analyze the data. Data analysis included: a) distribution of  
16 respondents by gender, age and education; b) multivariate logistic regression of  
17 healthcare-seeking and antibiotics use using social demographics and common  
18 symptoms as the independent variables; c) relationships between number of  
19 symptoms experienced by a single patient and his or her healthcare-seeking and  
20 antibiotics use. Cases with missing data were excluded from the data analyses.

#### 21 *Ethical review*

22 The study protocol was reviewed and approved by the Biomedical Ethics Committee  
23 of Anhui Medical University (reference number: 201500800) prior to the study  
24 commencing. Participation of rural residents was voluntary and written informed  
25 consent was obtained from all participants.

## 26 **Results**

### 27 **Overview of participants, symptoms and healthcare-seeking**

28 As shown in Figure 1 and Table 1, a total of 2160 residents were accessed and 1968  
29 completed the survey, resulting in a response rate of 91.1%. The mean age of  
30 respondents was 50.39 years (SD=13.04 years). The majority (68.0%) were females  
31 and around one third (29.6%) had no formal school education. The high proportion  
32 of female respondents in this random sample results from the fact that in this rural  
33 area the majority of male residents have moved to cities to obtain temporary work  
34 [33]. Over 80% of reported infections had occurred within nine months prior to the  
35 survey. Dry cough (58.9%, 1159), rhinorrhea without pus (51.7%, 1017) and sore  
36 throat (49.8%, 980) were the most common symptoms. 55.7% of respondents  
37 reported seeking professional help from clinics, 13.4% bought medicine from  
38 medicine shops, 23.1% used leftover medicine from previous illnesses and 20.8%  
39 did nothing. Altogether, 81.3% of respondents reported having used antibiotics to  
40 treat their RTI. As shown in Table 2, Time interval between onset of infection and  
41 when the data were collected was not associated with any statistical differences

1 between in healthcare-seeking behavior except use of leftover medicines, suggesting  
2 that recall bias had limited effects (see also Discussion and Limitations sections).

### 3 **Individual symptoms and treatment-seeking**

4 Table 3 displays logistic regression modeling between service use and individual  
5 symptoms and socio-demographic characteristics. Education was negatively  
6 associated with seeking help from clinics (OR=0.790[0.697-0.896]), but positively  
7 related with buying medicine (OR=1.230[1.068-1.417]) and using leftover medicine  
8 (OR=1.283[1.073-1.535]); Females were more likely to use leftover medicine than  
9 males (OR=2.016[1.411-2.881]), while age had no effects on any treatment-seeking  
10 behavior. When controlled for social demographic characteristics, buying medicine  
11 was positively related with cough (OR=1.452[1.124-1.875]); taking leftover  
12 medicine, with headache and soreness (OR=1.581[1.169-2.138]); and seeking help  
13 from clinics, with sore throat (OR=1.355[1.109-1.654]), cough  
14 (OR=1.492[1.198-1.859]), shortness of breath (OR=1.707[1.287-2.265]) and fever  
15 (OR=2.142[1.654-2.775]). Being prescribed antibiotics at clinics was related  
16 positively only to with earache and/or tinnitus (OR=4.884[1.162-20.522]), while  
17 purchasing antibiotics OTC from medicine shops was positively linked with  
18 productive cough (OR=1.971[1.125-3.453]). Rhinorrhea with or without pus are not  
19 associated with any specific treatment-seeking behavior.

### 20 **Concurrent symptoms and service use**

21 Figure 2 and Appendices 1-2 display the relationships between service-seeking and  
22 number of concurrent symptoms in total and by demographic characteristics. Overall,  
23 seeking help from clinics and getting antibiotics at clinics show a clear increasing  
24 trend with number of symptoms. Only 37.5% of respondents who had experienced  
25 one symptom had sought help from a clinic, while 75.0% those who had  
26 experienced over seven symptoms had done so. Similarly, the use of antibiotics at  
27 clinics increased from 77.7% for patients with one symptom to 96.4% for those with  
28 over seven symptoms. However buying medicine from shops, taking leftover  
29 medicine and getting antibiotics from shops showed no statistically significant trend  
30 as the number of symptoms increased. The relationships between number of  
31 symptoms and service-seeking were consistent across all gender, age and education  
32 subgroups. This inter-subgroup consistency was also observed in the null trend of  
33 getting antibiotics at clinics or at medicine shops by patients with increasing number  
34 of symptoms.

### 35 **Discussion**

36 This study has uncovered useful data for better understanding the experience of RTIs  
37 among patients in the community and their relations with healthcare seeking and  
38 antibiotics use. The study showed selective associations between service use and  
39 socio-demographic characteristics. Education was negatively related to seeking help



1 from clinics but positively associated with taking leftover medicine and buying  
2 medicine from shops; while females are more likely than males to take leftover  
3 medicine. However, specifically using antibiotics obtained from clinics and  
4 medicine shops did not show any statistically significant socio-demographic  
5 differences. These findings may suggest that decisions on whether or not to visit a  
6 clinic, take leftover medicine or buy medicine from a shop is made by patients  
7 themselves and is thus amenable to the influence of patients' socio-demographic  
8 characteristics; while the decision on whether or not to provide antibiotics to patients  
9 is determined mainly by the doctors at clinics or staff at medicine shops and thus is  
10 not affected by these characteristics.

11  
12 The study documented strong and consistent relations between symptoms and  
13 service-seeking. As the number of concurrent symptoms increased from 1 to 7 or  
14 more, the proportion of patients who had sought help from clinics increased from  
15 37.5% to 75.0% and the proportion of service seekers who had been prescribed  
16 antibiotics increased from 77.7% to 96.4%. These findings suggest that clustering of  
17 symptoms affect both patient- and doctor-led behavior and thus merit particular  
18 attention in future interventions. Interestingly, the difference in the percentage of  
19 service-seeking for patients with 1 symptom (37.5%) versus that for those with 7+  
20 symptoms (75.0%) is substantially greater than that of antibiotics prescribing (77.7%  
21 versus 96.4%). One possible explanation for this difference is that patients directly  
22 suffer from symptoms while professionals are only told about them by their patients,  
23 so patient-led behaviors (i.e. health service-seeking) may be more sensitive to  
24 symptoms than professional-led ones (i.e. antibiotics prescribing). [34,35] In  
25 addition, as lay persons, patients may not be as capable as doctors of distinguishing  
26 important from non-important symptoms, and so numbers of symptoms have closer  
27 links with perceptions of acute or serious illness among patients than among health  
28 professionals. As for the lack of correlation between number of symptoms and  
29 purchase of medicines from shops, this may reflect the combined effects of two  
30 drivers. On the one hand, more symptoms serve as a greater driver for patients to  
31 seek professional help from clinics as well as medicine shops. On the other, seeking  
32 help from clinics and shops are competitive behaviors and as patients experience  
33 more symptoms they are more likely to visit clinics than shops.

34  
35 In addition, positive relationships were found between a number of specific  
36 symptoms and service-seeking. Seeking help from clinics was linked to, in order of  
37 magnitude of logistic regression coefficient, fever ( $B=0.76$ ), shortness of breath  
38 ( $B=0.54$ ), cough ( $B=0.40$ ) and soreness ( $B=0.30$ ). These coefficients and their rank  
39 order reveal useful information about the perceived importance, suffering and  
40 urgency of each of the corresponding symptoms for patients. Compared with  
41 seeking help from clinics, the driving symptoms for buying medicine from shops  
42 may be milder in nature and fewer in number, with only 1 symptom, dry cough,

1 being positively associated with the latter behavior. This indicates that patients with  
2 equal access to the two kinds of help tend to choose clinics rather than shops if they  
3 have more and severer symptoms and vice versa. In addition, being given antibiotics  
4 at clinics was linked with earache and/or tinnitus and at medicine shops, with  
5 productive cough. These findings are consistent with published evidence.[36]

## 6 **Study Limitations**

7 The study has a number of limitations. First, the study relied on subjective  
8 perceptions and self-reports. Individuals are poor at accurately reporting certain  
9 health behaviors and feelings and inherent tendencies to respond in ways that make  
10 them appear healthier or otherwise conform to social norms may introduce bias.  
11 However, these characteristics are typically apparent across the board, reducing the  
12 effects of this threat to internal validity. More importantly, the long recall period  
13 between last experienced episode and survey data collection is likely to have led to  
14 recall bias; milder RTIs in particular, exact patterns of symptom experience and  
15 details of associated treatment-seeking behavior may have been forgotten. Our  
16 findings do suggest some extent of recall/memory bias, but Table 1 shows that there  
17 was no statistical relationship between time interval from onset of infection and data  
18 collection for any healthcare-seeking behavior except for use of leftover medicines,  
19 which was reported as 9.6% among patients with a time interval of over 9 months  
20 compared with 16.2% among patients with a less than 3 month time interval. Second,  
21 given the broad symptom-based definition of RTIs used in the study, seasonal and  
22 other influences on symptom occurrence may have affected the frequency of  
23 symptoms. Third, the overrepresentation of females may raise concerns about  
24 selection biases. However, our analysis revealed no significant differences by gender  
25 in terms of symptom-related treatment-seeking except for taking leftover medicines,  
26 which was more commonly reported by females.

27  
28 **Contributors** Mengjie Diao participated in data collection and drafted the  
29 manuscript. Xingrong Shen and Rui Feng designed the instruments and performed  
30 data analysis. Jing Cheng and Jing Chai implemented field data collection, trained  
31 data collectors and controlled data quality. Rongyao Zhou and Panpan Zhang  
32 implemented the data collection. Debin Wang provided expertise for overall design  
33 of the study and revised and finalized the manuscript. Helen Lambert contributed to  
34 the interpretation of data and revised and finalized the manuscript. All authors  
35 approved the final version to be published and agree to be accountable for all aspects  
36 of the work in ensuring that questions related to the accuracy or integrity of any part  
37 of the work are appropriately investigated and resolved.

38  
39 **Funding** This study was supported partly by China-UK Prosperity Found (Grant  
40 number PPYCHN1590/15SS19) and partly by the National Nature Science  
41 Foundation of China and the Medical Research Council of the United Kingdom

1 (Grant number 81661138001 and 71704003).

2 **Declaration of Conflicting Interests** The authors declare no potential conflicts of  
3 interest with respect to the research, authors and/or publication of this article.

4 **Data sharing statement** Anonymised participant data used in the preparation of this  
5 article will be made available on request from the lead author.

## 6 **References**

- 7 1. Leder K, Sinclair M I, Mitakakis T Z, et al. A community-based study of respiratory episodes  
8 in Melbourne, Australia[J]. *Aust N Z J Public Health*.2003;27(4): 399–404.DOI:  
9 10.1111/j.1467-842X.2003.tb00416.x [PubMed:14705301]
- 10 2. Hull J D, Barton I P, Torgersen J, et al. A Survey of the Experience and Impact of Acute Upper  
11 Respiratory Tract Infections on People in Six Countries in the 2011/2012 Common Cold and  
12 Flu Season[J]. *Open Journal of Respiratory Diseases*, 2013,03(4):175-187.DOI:  
13 10.4236/ojrd.2013.34026
- 14 3. Collaborators M C O D. Global, regional, and national age-sex specific all-cause and  
15 cause-specific mortality for 240 causes of death, 1990-2013: a systematic analysis for the  
16 Global Burden of Disease Study 2013.[J]. *Lancet*, 2015, 385(9963):117-171.DOI:  
17 10.1016/S0140-6736(14)61682-2. [PubMed: 25530442]
- 18 4. More than 1.2 million adolescents die every year, nearly all preventable.[http://www.who.int/  
19 mediacentre/news/releases/2017/yearly-adolescent-deaths/en/](http://www.who.int/mediacentre/news/releases/2017/yearly-adolescent-deaths/en/) (accessed 5 Jul 2017).
- 20 5. Adam PF, Hendershot GE, Marano MA. Current estimates from the National Health Interview  
21 Survey [J]. *Vital Health Stat*, 1999, 10(6):59-66. [Pubmed:15782448]
- 22 6. Oppong R, Coast J, Hood K, et al. Resource use and costs of treating acute cough/lower  
23 respiratory tract infections in 13 European countries: results and challenges[J]. *European  
24 Journal of Health Economics*, 2011, 12(4):319-329. DOI: 10.1007/s10198-010-0239-1.  
25 [Pubmed:20364288]
- 26 7. Thompson M, Vodicka T A, Blair P S, et al. Duration of symptoms of respiratory tract  
27 infections in children: systematic review[J]. *Bmj British Medical Journal*, 2013, 347(dec11  
28 1):f7027.DOI: 1136/bmj.f7027 [PubMed: 24335668]
- 29 8. Petersen I, Hayward A C. Antibacterial prescribing in primary care[J]. *Journal of  
30 Antimicrobial Chemotherapy*, 2007, 60 Suppl 1(Supplement 1):i43.DOI:10.1093/jac/  
31 dkm156[PubMed: 17656380]
- 32 9. Gulliford M C, Dregan A, Moore M V, et al. Continued high rates of antibiotic prescribing to  
33 adults with respiratory tract infection: survey of 568 UK general practices[J]. *Bmj Open*,  
34 2014, 4(10):e006245.DOI: 10.1136/bmjopen-2014-006245.[PubMed:PMC4212213]
- 35 10. Costelloe C, Metcalfe C, Lovering A, et al. Effect of antibiotic prescribing in primary care on  
36 antimicrobial resistance in individual patients: systematic review and meta-analysis[J]. *Bmj*,  
37 2010, 340(7756):1120-1120.DOI: 10.1136/bmj.c2096.[PubMed: 20483949]
- 38 11. Lu Y, Tong J, Pei F, et al. Viral aetiology in adults with acute upper respiratory tract infection  
39 in Jinan, Northern China.[J]. *Clinical & Developmental Immunology*, 2013, 2013(2):  
40 869521-869521. DOI: 10.1155/2013/869521.[PubMed:PMC3649347 ]
- 41 12. Kochen M M, Susanne F, Thomas F, et al. Influence of patient symptoms and physical



- 1 findings on general practitioners' treatment of respiratory tract infections: a direct  
2 observation study[J]. *Bmc Family Practice*, 2005, 6(1):1-7.DOI:10.1186/1471-2296-6-6  
3 [PubMed:PMC550651 ]
- 4 13. Halvorsen P A, Godycki-Cwirko M, Wennevold K, et al. Would GPs advise patients with  
5 respiratory tract infections to refrain from exercise, stay indoors or stay in bed? Survey of  
6 GPs in Poland and Norway[J]. *European Journal of General Practice*, 2013,  
7 20(3):209-213.DOI: 10.3109/13814788.2013.848339.[PubMed: 24219344 ]
- 8 14. Ahmad A, Patel I, Mohanta G P, et al. Evaluation of Self Medication Practices in Rural Area  
9 of Town Sahaswan at Northern India[J]. *Annals of medical and health sciences research*,  
10 2014, 4(2):73-8.DOI: 10.4103/2141-9248.138012.[PubMed: PMC4145522 ]
- 11 15. Courtenay M, Rowbotham S, Lim R, et al. Antibiotics for acute respiratory tract infections: a  
12 mixed-methods study of patient experiences of non-medical prescriber management[J]. *Bmj*  
13 *Open*, 2017, 7(3):e013515.DOI: 10.1136/bmjopen-2016-013515.[PubMed: PMC5353344]
- 14 16. Essack S, Pignatari A C. A framework for the non-antibiotic management of upper  
15 respiratory tract infections: towards a global change in antibiotic resistance.[J]. *International*  
16 *Journal of Clinical Practice*, 2013, 67(Supplement s180):4-9.DOI:10.1111/ijcp.12335.  
17 [PubMed: 24238424]
- 18 17. Wang X, Liu Z. Prevention and treatment of viral respiratory infections by traditional  
19 Chinese herbs[J]. *Chinese medical journal*, 2014, 127(7):1344-1350.DOI: 10.3760/  
20 *cma.j.issn.0366-6999.20132029* [PubMed: 24709192]
- 21 18. Wun Y T, Tai P L, Lam K F, et al. Comparison of the knowledge, attitudes and practice with  
22 antibiotic use between traditional Chinese medicine and western medicine usual attenders in  
23 Hong Kong[J]. *Complementary Therapies in Medicine*, 2014, 22(1):99-106.DOI:  
24 10.1016/j.ctim.2013.11.004.[PubMed: 24559824]
- 25 19. Blaiss M, Dicipinigitis P, Eccles R, et al. Consumer Attitudes on Cough and Cold: US  
26 (ACHOO) Survey Results.[J]. *Current Medical Research & Opinion*, 2015(8):1527-  
27 1538.DOI: 10.1185/03007995.2014.1002558.[PubMed: 25535904]
- 28 20. Birk H O, Gut R, Henriksen L O. Patients' experience of choosing an outpatient clinic in one  
29 county in Denmark: results of a patient survey[J]. *BMC Health Serv Res.*, 2011,  
30 11(1):262.DOI: 10.1186/1472-6963-11-262.[PubMed: PMC3205034]
- 31 22. Kaae S, Malaj A, Hoxha I. Antibiotic knowledge, attitudes and behaviours of Albanian health  
32 care professionals and patients – a qualitative interview study[J]. *J Pharm Policy Pract.* ,  
33 2017, 10(1):13.DOI: 10.1186/s40545-017-0102-1. [PubMed: PMC5379499]
- 34 23. Hawking M K, Lecky D M, Lundgren P T, et al. Attitudes and behaviours of adolescents  
35 towards antibiotics and self-care for respiratory tract infections: a qualitative study[J]. *Bmj*  
36 *Open*, 2017, 7(5):e015308.DOI: 1136/bmjopen-2016-015308. [PubMed: 28592579]
- 37 24. Rebnord I K, Sandvik H, Mjelle A B, et al. Factors predicting antibiotic prescription and  
38 referral to hospital for children with respiratory symptoms: secondary analysis of a  
39 randomised controlled study at out-of-hours services in primary care[J]. *Bmj Open*, 2017,  
40 7(1):e012992.
- 41 25. Rebnord I K, Sandvik H, Mjelle A B, et al. Out-of-hours antibiotic prescription after  
42 screening with C reactive protein: a randomised controlled study[J]. *Bmj Open*, 2016,

- 1 6(5):e011231.
- 2 26. Hopkins S. Cultural and Socioeconomic Determinants of Antibiotic Use[M]// Antibiotic
- 3 Policies: Fighting Resistance. Springer US, 2008:29-40.
- 4 27. Gach O, Troisfontaines P, Legrand V. Identification of cultural determinants of antibiotic use
- 5 cited in primary care in Europe: a mixed research synthesis study of integrated design
- 6 “Culture is all around us”[J]. *Bmc Public Health*, 2015, 15(1):1-9.DOI:10.1186/
- 7 s12889-015-2254-8. [Pubmed: PMC4574721]
- 8 28. Reynolds L, Mckee M. Factors influencing antibiotic prescribing in China: An exploratory
- 9 analysis[J]. *Health Policy*, 2009, 90(1):32.DOI: 10.1016/j.healthpol.2008.09. 002. [Pubmed:
- 10 18849089]
- 11 29. Cho HJ, Hong SJ, Park S. Knowledge and beliefs of primary care physicians, pharmacists,
- 12 and parents on antibiotic use for the pediatric common cold. *Soc Sci Med* 2004; 58:623–
- 13 9.DOI:org/10.1016/S0277-9536(03)00231-4 [Pubmed:14652058]
- 14 30. Ning R G, Min K, Zhen H Z. Analysis of the incidence and treatment of common cold in
- 15 Guangzhou residents in 2006[J]. *Southern China preventive medicine*, 2008, 34(4):
- 16 46-48.DOI: 1671 -5039( 2008) 04 -0046 -03
- 17 31. Dong L, Yan H, Wang D. Antibiotic prescribing patterns in village health clinics across 10
- 18 provinces of Western China[J]. *Antimicrob Chemother* 2008;62:410–5.DOI: 10.1093/
- 19 jac/dkn153. [Pubmed:18400805]
- 20 32. Wang J, Wang P, Wang X et al. Use and prescription of antibiotics in primary health care
- 21 settings in China. *JAMA Intern Med*2014;174:1914–20.DOI: 10.1001/jamainternmed.
- 22 2014.5214. [Pubmed:25285394]
- 23 33. Chai J, Chen P, Feng R, et al. Life events and chronic physical conditions among left-behind
- 24 farmers in rural China a cross-sectional study[J]. *Bmc Public Health*, 2015, 15(1):594.
- 25 34. Tan Y S, Hong C Y, Chong P N, et al. Knowledge that upper respiratory tract infection
- 26 resolves on its own is associated with more appropriate health-seeking behavior and
- 27 antibiotic cognition.[J]. *Singapore Medical Journal*, 2006, 47(6):518.DOI: 10.1016/
- 28 j.socscimed.2015.05.027. [Pubmed: 16752021]
- 29 35. Grigoryan L, Burgerhof J G M, Haaijerruskamp F M, et al. Is self-medication with
- 30 antibiotics in Europe driven by prescribed use?[J]. *Journal of Antimicrobial Chemotherapy*,
- 31 2007, 59(1):152-6.DOI:10.1093/jac/dk1457 [Pubmed: 17124192]
- 32 36. Chang A B, Oppenheimer J J, Weinberger M, et al. Children With Chronic Wet or Productive
- 33 Cough—Treatment and Investigations:A Systematic Review[J]. *Chest*, 2016, 149(1):120-142.
- 34 DOI: 10.1378/chest.15-2065. [Pubmed: 26757284]

35 Table 1 Characteristics of 1968 adults with respiratory tract infection

36 Figure 1 Flow chart describing symptoms, healthcare-seeking and antibiotics use among study

37 population

38 Table2 Service use by time interval in between onset of infection and data collection

1  
2  
3 1 Table3 Multivariate logistic regression models between service-seeking and specific symptoms  
4

5 2 Figure 2 Service-seeking by number of symptoms in total and by genders  
6  
7  
8  
9  
10  
11  
12  
13  
14  
15  
16  
17  
18  
19  
20  
21  
22  
23  
24  
25  
26  
27  
28  
29  
30  
31  
32  
33  
34  
35  
36  
37  
38  
39  
40  
41  
42  
43  
44  
45  
46  
47  
48  
49  
50  
51  
52  
53  
54  
55  
56  
57  
58  
59  
60

For peer review only

1  
2  
3  
4  
5  
6  
7 1 Table 1 Characteristics of 1968 adults with respiratory tract infection

|           | Male      | Female    | Total     |
|-----------|-----------|-----------|-----------|
| Age       |           |           |           |
| 18-40y    | 128(20.3) | 317(23.7) | 445(22.6) |
| 41-50y    | 152(24.1) | 360(26.9) | 512(26.0) |
| 51-60y    | 134(21.3) | 323(24.1) | 457(23.3) |
| ≥61y      | 216(34.3) | 338(25.3) | 554(28.2) |
| Education |           |           |           |
| 0y        | 95(15.1)  | 487(36.4) | 582(29.6) |
| 1-6y      | 195(31.0) | 390(29.1) | 585(29.7) |
| 7-9y      | 269(42.7) | 360(26.9) | 629(32.0) |
| ≥10y      | 71(11.3)  | 101(7.5)  | 172(8.7)  |
| Total     | 630       | 1338      | 1968      |

23  
24  
25 Table 2 Service use by time interval between onset of infection and data collection

| Time interval (Days) | Total      | Buying medicine from medicine shops | Taking leftover medicine | Seeking help from clinics | Getting antibiotics at clinics | Getting antibiotics at medicine shops |
|----------------------|------------|-------------------------------------|--------------------------|---------------------------|--------------------------------|---------------------------------------|
| ≤90                  | 844(44.6%) | 196(23.3%)                          | 136(16.2%)               | 475(56.3%)                | 315(86.1%)                     | 144(77.4%)                            |
| 91-180               | 494(26.1%) | 107(21.8%)                          | 60(12.2%)                | 276(55.9%)                | 177(85.9%)                     | 67(67.0%)                             |
| 181-270              | 192(10.2%) | 51(26.6%)                           | 18(9.4%)                 | 110(57.3%)                | 72(85.7%)                      | 38(80.9%)                             |
| ≥271                 | 361(19.1%) | 80(22.2%)                           | 34(9.6%)                 | 198(54.8%)                | 116(84.7%)                     | 59(78.7%)                             |
| $\chi^2$             |            | 1.907                               | 13.438                   | 0.355                     | 0.165                          | 5.409                                 |
| <i>P</i>             |            | 0.592                               | <b>0.004</b>             | 0.949                     | 0.983                          | 0.144                                 |

Table 3 Multivariate logistic regression models between service-seeking and specific symptoms

|                             | buying medicine from shops (n1=1484,n2=445) |                    | taking leftover medicine (n1=1668, n2=257) |                    | Seeking help from clinics (n1=857,n2=1078) |                    | Getting antibiotics at clinics (n1=117, n2=692) |                     | Getting antibiotics at shops (n1=103, n2=313) |                    |
|-----------------------------|---------------------------------------------|--------------------|--------------------------------------------|--------------------|--------------------------------------------|--------------------|-------------------------------------------------|---------------------|-----------------------------------------------|--------------------|
|                             | OR                                          | 95%CI              | OR                                         | 95%CI              | OR                                         | 95%CI              | OR                                              | 95%CI               | OR                                            | 95%CI              |
| Gender                      | 1.085                                       | 0.840-1.400        | <b>2.016</b>                               | <b>1.411-2.881</b> | 0.819                                      | 0.653-1.027        | 0.952                                           | 0.592-1.532         | 0.863                                         | 0.497-1.498        |
| Age                         | 0.984                                       | 0.873-1.109        | 0.866                                      | 0.742-1.011        | 1.104                                      | 0.993-1.227        | 0.887                                           | 0.704-1.118         | 1.022                                         | 0.789-1.324        |
| Education                   | <b>1.23</b>                                 | <b>1.068-1.417</b> | <b>1.283</b>                               | <b>1.073-1.535</b> | <b>0.79</b>                                | <b>0.697-0.896</b> | 0.849                                           | 0.646-1.114         | 1.133                                         | 0.842-1.523        |
| Sore throat                 | 1.016                                       | 0.810-1.275        | 1.303                                      | 0.971-1.748        | <b>1.355</b>                               | <b>1.109-1.654</b> | <b>2.05</b>                                     | <b>1.337-3.143</b>  | 1.604                                         | 0.990-2.599        |
| Rhinorrhea without pus      | 0.838                                       | 0.669-1.051        | 1.057                                      | 0.791-1.411        | 1.045                                      | 0.856-1.276        | 1.25                                            | 0.816-1.915         | 0.792                                         | 0.486-1.290        |
| Rhinorrhea with pus         | 0.96                                        | 0.714-1.292        | 0.78                                       | 0.531-1.145        | 1.045                                      | 0.804-1.359        | 1.013                                           | 0.566-1.813         | 1.796                                         | 0.869-3.711        |
| Dry cough                   | <b>1.452</b>                                | <b>1.124-1.875</b> | 0.809                                      | 0.587-1.114        | <b>1.492</b>                               | <b>1.198-1.859</b> | 1.318                                           | 0.812-2.140         | 1.328                                         | 0.777-2.269        |
| Productive cough            | 1.026                                       | 0.798-1.318        | 1.28                                       | 0.926-1.770        | 1.115                                      | 0.891-1.395        | 0.907                                           | 0.561-1.466         | <b>1.971</b>                                  | <b>1.125-3.453</b> |
| Shortness of breath,        | 0.782                                       | 0.571-1.071        | 0.695                                      | 0.458-1.054        | <b>1.707</b>                               | <b>1.287-2.265</b> | 0.927                                           | 0.533-1.613         | 1.049                                         | 0.488-2.255        |
| Earache/tinnitus            | 1.421                                       | 0.979-2.063        | 1.305                                      | 0.825-2.063        | 0.757                                      | 0.535-1.072        | <b>4.884</b>                                    | <b>1.162-20.522</b> | 1.489                                         | 0.608-3.648        |
| Headache general discomfort | 1.102                                       | 0.875-1.389        | 1.581                                      | 1.169-2.138        | 1.178                                      | 0.962-1.443        | 1.184                                           | 0.765-1.831         | 1.026                                         | 0.623-1.690        |
| Fever                       | 0.778                                       | 0.583-1.037        | 1.223                                      | 0.866-1.725        | <b>2.142</b>                               | <b>1.654-2.775</b> | 1.33                                            | 0.791-2.236         | 1.74                                          | 0.833-3.633        |

Note: n1 and n2 stands for the number of no and yes response respectively to each service use behavior; for each service use behavior, no (n1) was coded as 0 and yes(n2), as 1. Gender: 1=male,2=female; Age group: 1= ≤40y, 2=41-50y, 3=51-60y,4= ≥61y; Educatio: 1=0 years,2=1-6 years ,3=7-9 years ,4=≥10 years. Symptoms: no= 0 and yes= 1; Medicines comprise all kinds of drugs used for treating illnesses and antibiotics are one kind of medicines.

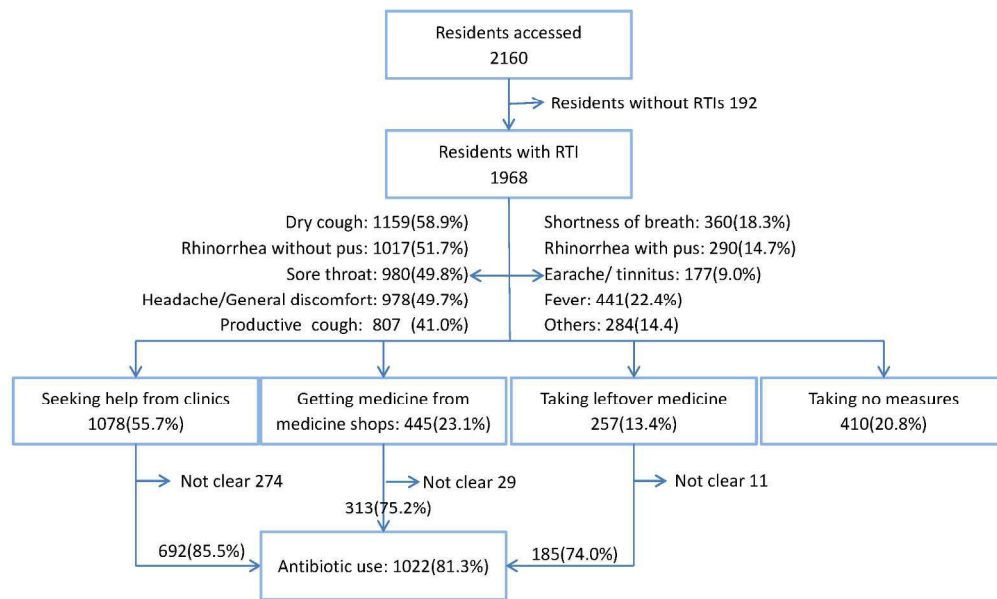

Figure 1 Flow chart describing symptoms, healthcare-seeking and antibiotics use among study population

224x136mm (300 x 300 DPI)



Figure 2 Healthcare-seeking by number of symptoms in total and by genders  
 Note: The numbers along the horizontal axis stand for numbers of symptoms; medicines comprise all kinds of drugs used for treating illnesses and antibiotics are one kind of medicines.

251x121mm (300 x 300 DPI)

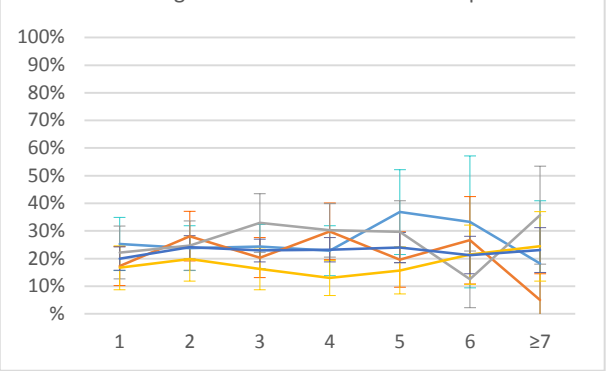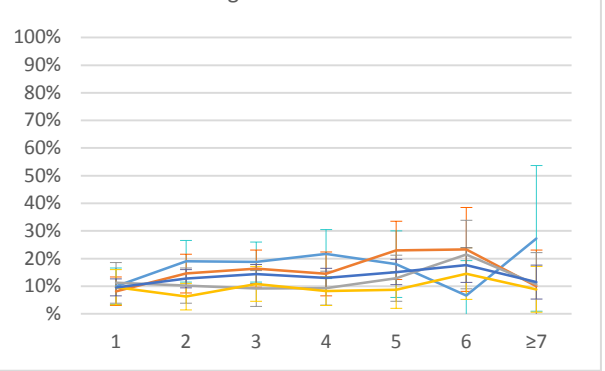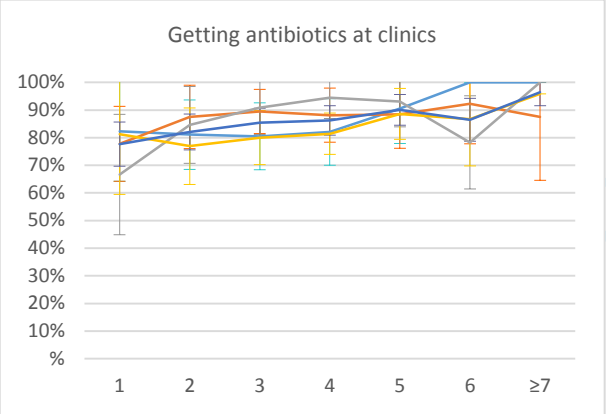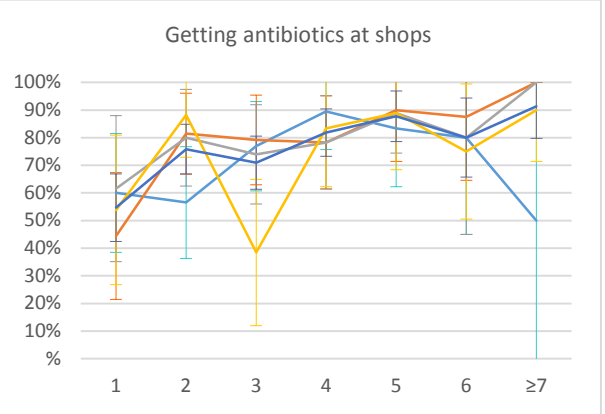

— 18-40 — 41-50 — 51-60 — ≥61 — Total

Appendix 1 Service-seeking by number of symptoms in total and by age

For peer review only - <http://bmjopen.bmj.com/site/about/guidelines.xhtml>

(Note: The numbers along the horizontal axis stand for numbers of symptoms; medicines comprise all kinds of drugs used for treating illnesses and antibiotics are one kind of medicines)



Seeking help from clinics

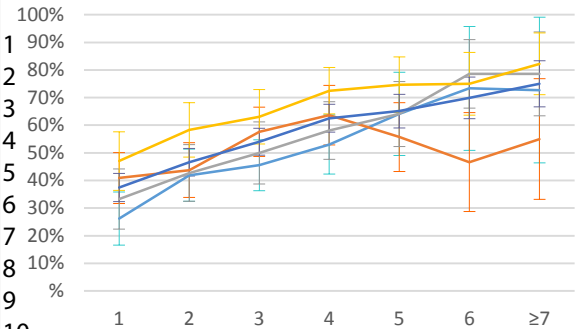

Getting medicine from medicine shops

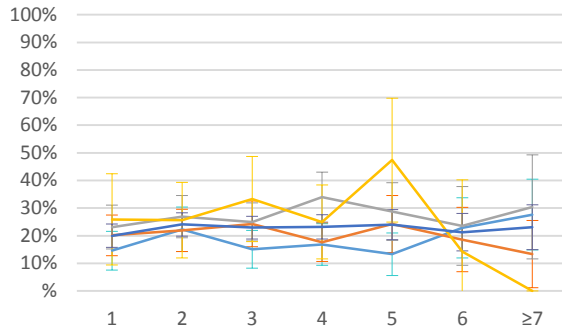

Taking left over medicine

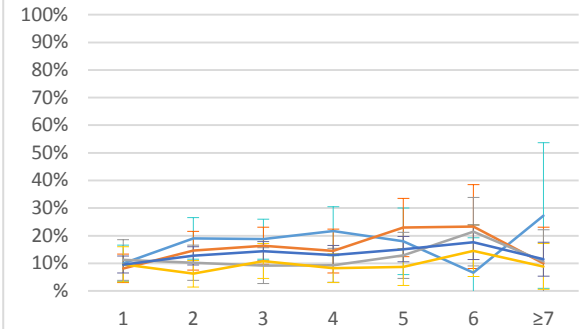

Taking no measures

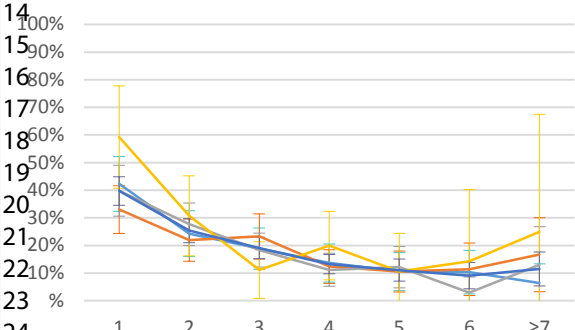

buying medicine from clinics

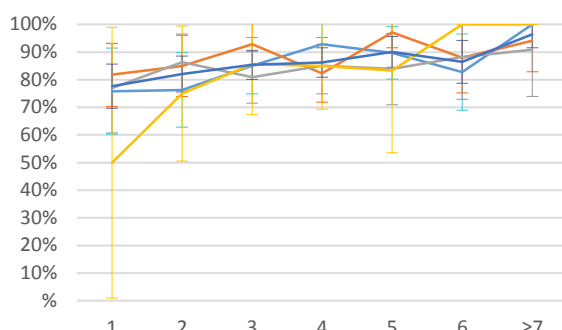

buying medicine from medicing shops

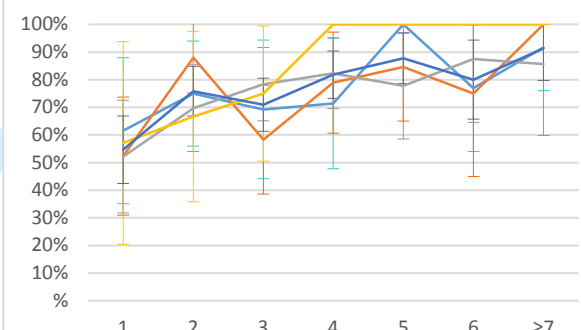

— 0 years — 1-6 years — 7-9 years — ≥10 years — Total

Appendix 2 Healthcare-seeking by number of symptoms in total and by education

For peer review only - <http://bmjopen.bmj.com/site/about/guidelines.xhtml>

Note: The numbers along the horizontal axis stand for numbers of symptoms; medicines comprise all kinds of drugs used for treating illnesses and antibiotics are

(the kind of medicines)

**STROBE 2007 (v4) Statement—Checklist of items that should be included in reports of *cross-sectional studies***

| Section/Topic             | Item # | Recommendation                                                                                                                                                                       | Reported on page # |
|---------------------------|--------|--------------------------------------------------------------------------------------------------------------------------------------------------------------------------------------|--------------------|
| Title and abstract        | 1      | (a) Indicate the study’s design with a commonly used term in the title or the abstract                                                                                               | P1,2               |
|                           |        | (b) Provide in the abstract an informative and balanced summary of what was done and what was found                                                                                  | P2                 |
| <b>Introduction</b>       |        |                                                                                                                                                                                      |                    |
| Background/rationale      | 2      | Explain the scientific background and rationale for the investigation being reported                                                                                                 | P3-4               |
| Objectives                | 3      | State specific objectives, including any prespecified hypotheses                                                                                                                     | P4                 |
| <b>Methods</b>            |        |                                                                                                                                                                                      |                    |
| Study design              | 4      | Present key elements of study design early in the paper                                                                                                                              | P4-5               |
| Setting                   | 5      | Describe the setting, locations, and relevant dates, including periods of recruitment, exposure, follow-up, and data collection                                                      | P4-5               |
| Participants              | 6      | (a) Give the eligibility criteria, and the sources and methods of selection of participants                                                                                          | P4-5               |
| Variables                 | 7      | Clearly define all outcomes, exposures, predictors, potential confounders, and effect modifiers. Give diagnostic criteria, if applicable                                             | P4-5               |
| Data sources/ measurement | 8*     | For each variable of interest, give sources of data and details of methods of assessment (measurement). Describe comparability of assessment methods if there is more than one group | P5-6               |
| Bias                      | 9      | Describe any efforts to address potential sources of bias                                                                                                                            | P8                 |
| Study size                | 10     | Explain how the study size was arrived at                                                                                                                                            | P4                 |
| Quantitative variables    | 11     | Explain how quantitative variables were handled in the analyses. If applicable, describe which groupings were chosen and why                                                         | P4                 |
| Statistical methods       | 12     | (a) Describe all statistical methods, including those used to control for confounding                                                                                                | P4                 |
|                           |        | (b) Describe any methods used to examine subgroups and interactions                                                                                                                  | NA                 |
|                           |        | (c) Explain how missing data were addressed                                                                                                                                          | P5                 |
|                           |        | (d) If applicable, describe analytical methods taking account of sampling strategy                                                                                                   | P4                 |
|                           |        | (e) Describe any sensitivity analyses                                                                                                                                                | NA                 |
| <b>Results</b>            |        |                                                                                                                                                                                      |                    |

|                          |     |                                                                                                                                                                                                              |      |
|--------------------------|-----|--------------------------------------------------------------------------------------------------------------------------------------------------------------------------------------------------------------|------|
| Participants             | 13* | (a) Report numbers of individuals at each stage of study—eg numbers potentially eligible, examined for eligibility, confirmed eligible, included in the study, completing follow-up, and analysed            | P5   |
|                          |     | (b) Give reasons for non-participation at each stage                                                                                                                                                         | P5   |
|                          |     | (c) Consider use of a flow diagram                                                                                                                                                                           | P5   |
| Descriptive data         | 14* | (a) Give characteristics of study participants (eg demographic, clinical, social) and information on exposures and potential confounders                                                                     | P5   |
|                          |     | (b) Indicate number of participants with missing data for each variable of interest                                                                                                                          | P5   |
| Outcome data             | 15* | Report numbers of outcome events or summary measures                                                                                                                                                         | P5   |
| Main results             | 16  | (a) Give unadjusted estimates and, if applicable, confounder-adjusted estimates and their precision (eg, 95% confidence interval). Make clear which confounders were adjusted for and why they were included | P6   |
|                          |     | (b) Report category boundaries when continuous variables were categorized                                                                                                                                    | P5,6 |
|                          |     | (c) If relevant, consider translating estimates of relative risk into absolute risk for a meaningful time period                                                                                             | P6   |
| Other analyses           | 17  | Report other analyses done—eg analyses of subgroups and interactions, and sensitivity analyses                                                                                                               | NA   |
| <b>Discussion</b>        |     |                                                                                                                                                                                                              |      |
| Key results              | 18  | Summarise key results with reference to study objectives                                                                                                                                                     | P7   |
| Limitations              | 19  | Discuss limitations of the study, taking into account sources of potential bias or imprecision. Discuss both direction and magnitude of any potential bias                                                   | P8   |
| Interpretation           | 20  | Give a cautious overall interpretation of results considering objectives, limitations, multiplicity of analyses, results from similar studies, and other relevant evidence                                   | P7-8 |
| Generalisability         | 21  | Discuss the generalisability (external validity) of the study results                                                                                                                                        | P8   |
| <b>Other information</b> |     |                                                                                                                                                                                                              |      |
| Funding                  | 22  | Give the source of funding and the role of the funders for the present study and, if applicable, for the original study on which the present article is based                                                | P9   |

\*Give information separately for cases and controls in case-control studies and, if applicable, for exposed and unexposed groups in cohort and cross-sectional studies.

**Note:** An Explanation and Elaboration article discusses each checklist item and gives methodological background and published examples of transparent reporting. The STROBE checklist is best used in conjunction with this article (freely available on the Web sites of PLoS Medicine at <http://www.plosmedicine.org/>, Annals of Internal Medicine at <http://www.annals.org/>, and Epidemiology at <http://www.epidem.com/>). Information on the STROBE Initiative is available at [www.strobe-statement.org](http://www.strobe-statement.org).
