# Supplementary material for: How patients’ experiences of respiratory tract infections affect healthcare-seeking and antibiotic use: insights from a cross-sectional survey in rural Anhui, China
Source: PubMed Central journal article supplement — BMJ Open. 2018 Feb 3;8(2):e019492. doi: 10.1136/bmjopen-2017-019492 (PMC5829932; doi:10.1136/bmjopen-2017-019492), 2018-02-03
Supplement: bmjopen-2017-019492supp001.pdf [file bmjopen-2017-019492supp001.pdf]

Seeking help from clinics

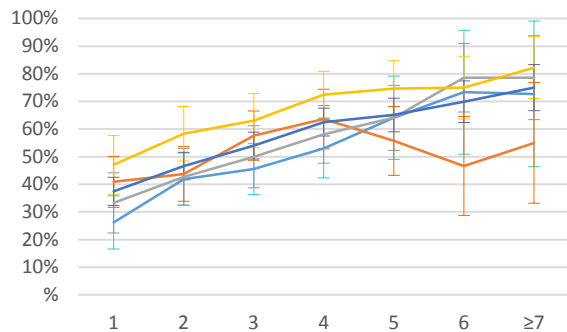

Getting medicine from medicine shops

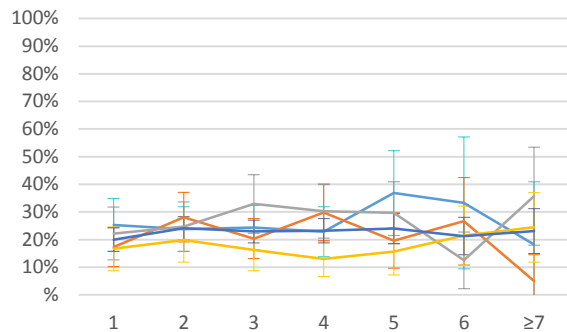

Taking left over medicine

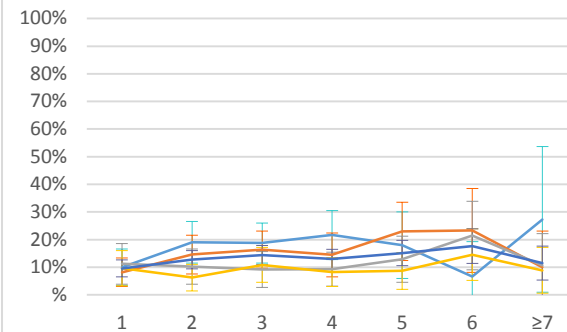

Taking no measures

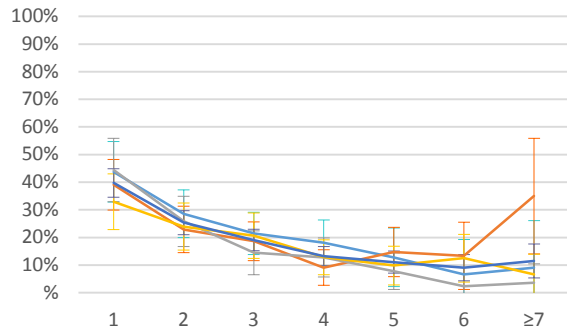

Getting antibiotics at clinics

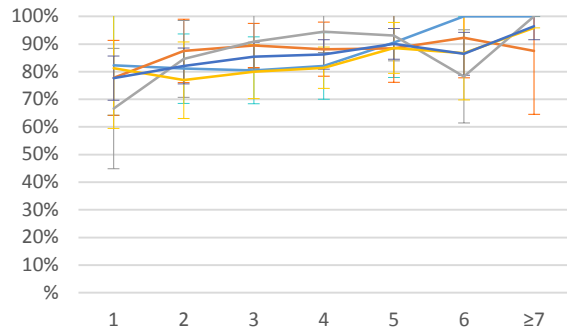

Getting antibiotics at shops

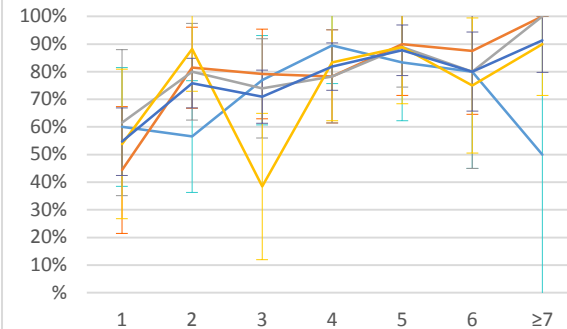

— 18-40 — 41-50 — 51-60 — ≥61 — Total

Appendix 1 Service-seeking by number of symptoms in total and by age

(Note: The numbers along the horizontal axis stand for numbers of symptoms; medicines comprise all kinds of drugs used for treating illnesses and antibiotics are one kind of medicines)

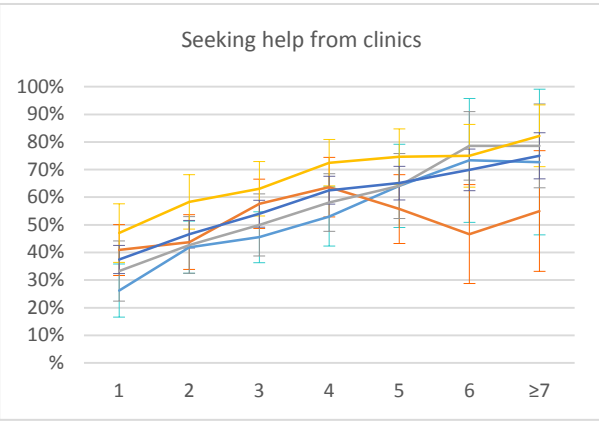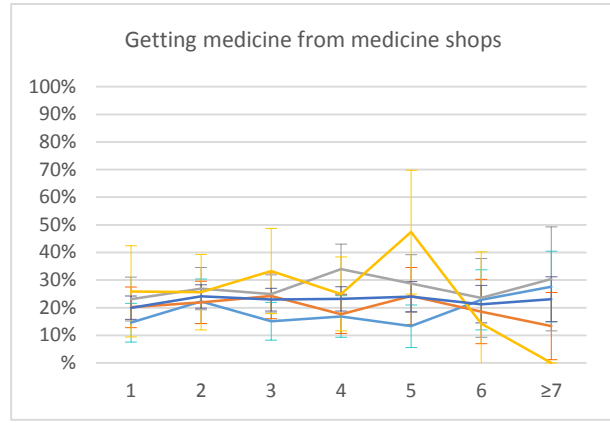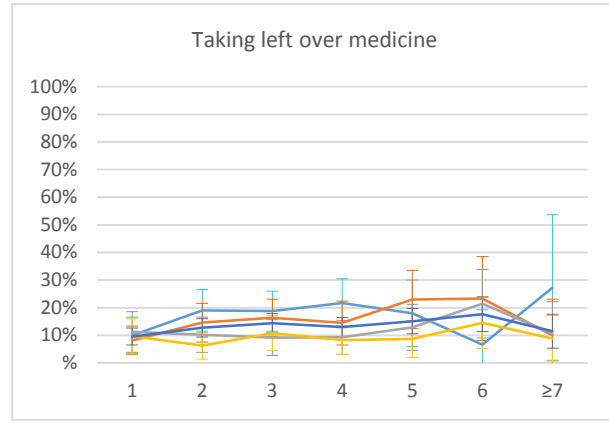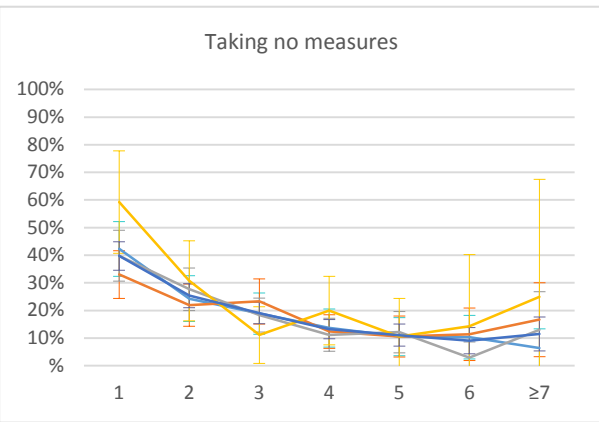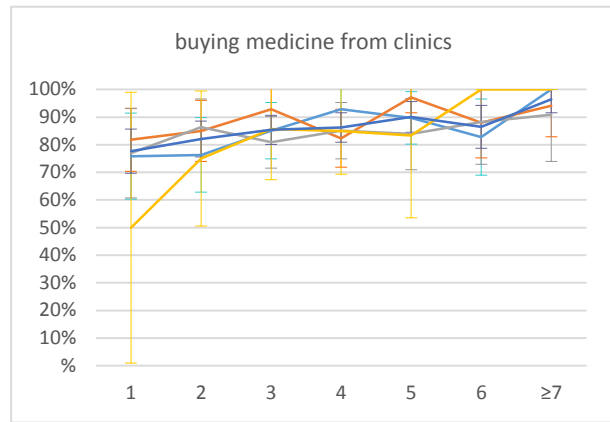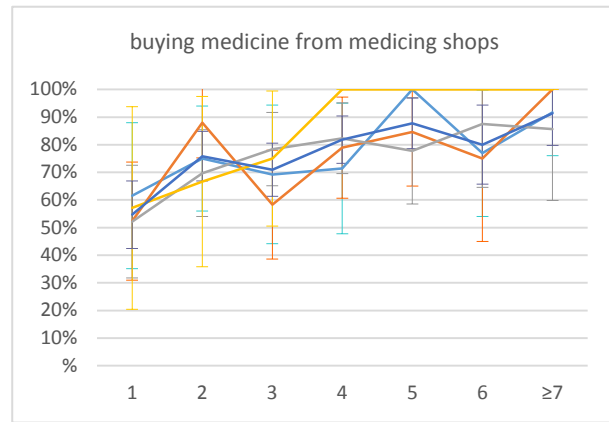

— 0 years — 1-6 years — 7-9 years — ≥10 years — Total

Appendix 2 Healthcare-seeking by number of symptoms in total and by education

(Note: The numbers along the horizontal axis stand for numbers of symptoms; medicines comprise all kinds of drugs used for treating illnesses and antibiotics are one kind of medicines)
